# Supplementary material for: Asymmetric sequential Au(i)/chiral tertiary amine catalysis: an enone-formation/cyanosilylation sequence to synthesize optically active 3-alkenyloxindoles from diazooxindoles
Source: Royal Society of Chemistry journal article supplement (doi:10.1039/c6cc00333h), 2016-01-01
Supplement: c6cc00333h1.pdf [file c6cc00333h1.pdf]

**Asymmetric sequential Au(I)/chiral tertiary amine catalysis: an enone-formation/cyanosilylation sequence to optically active 3-alkenyloxindoles from diazooxindoles**

Yu-Lei Zhao,<sup>a</sup> Zhong-Yan Cao,<sup>a</sup> Xing-Ping Zeng<sup>a</sup> Jia-Meng Shi,<sup>b</sup> Yi-Hua Yu<sup>b</sup> and Jian Zhou<sup>\*a,c</sup>

<sup>a</sup> Shanghai Key Laboratory of Green Chemistry and Chemical Processes, School of Chemistry and Molecular Engineering, East China Normal University, 3663N, Zhongshan Road, Shanghai 200062, China. E-mail: jzhou@chem.ecnu.edu.cn.

<sup>b</sup> Shanghai Key Laboratory of Magnetic Resonance, Department of Physics, East China Normal University, 3663N, Shanghai 200062, P. R. China.

<sup>c</sup> State Key Laboratory of Organometallic Chemistry, Shanghai Institute of Organic Chemistry, CAS, Shanghai 200032, P. R. China.

**Supporting Information**

|    | <b>Contents</b>                                                                                                | <b>Page</b> |
|----|----------------------------------------------------------------------------------------------------------------|-------------|
|    | General information                                                                                            | 2           |
| 1) | The Au(I)-catalyzed enone formation from diazo reagents <b>1a</b> or <b>5</b> and 2,5-dimethyl furan <b>2a</b> | 3           |
| 2) | The assignment of the configuration of enone <b>6</b> by NMR analysis                                          | 4-6         |
| 3) | Condition optimization for the asymmetric cyanosilylation reaction                                             | 7-8         |
| 4) | General procedure for the one-pot enone-formation/cyanosilylation sequence                                     | 9-14        |
| 5) | The synthesis of product <b>8</b>                                                                              | 14          |
| 6) | Single-Crystal X-ray Crystallography of <b>4i</b>                                                              | 15-31       |
| 7) | NMR spectra                                                                                                    | 32-62       |
| 8) | HPLC spectra                                                                                                   | 63-75       |

**General:** Reactions were monitored by thin layer chromatography using UV light to visualize the course of reaction. Purification of reaction products was carried out by flash chromatography on silica gel. Chemical yields refer to pure isolated substances. The  $[\alpha]_D$  was recorded using PolAAr 3005 High Accuracy Polarimeter. Infrared (IR) spectra were obtained using a Bruker tensor 27 infrared spectrometer.  $^1\text{H}$ ,  $^{13}\text{C}$ , and  $^{19}\text{F}$  NMR spectra were obtained using a Bruker DPX-300, 400 or 500 spectrometer. Chemical shifts are reported in ppm from  $\text{CDCl}_3$ ,  $(\text{CD}_3)_2\text{CO}$  or  $\text{DMSO-d}_6$  with the solvent resonance as the internal standard. The following abbreviations were used to designate chemical shift multiplicities: s = singlet, d = doublet, t = triplet, q = quartet, m = multiplet, br = broad.

Anhydrous  $\text{CH}_2\text{Cl}_2$  was prepared by first distillation over  $\text{P}_2\text{O}_5$  and then from  $\text{CaH}_2$ . AgOTf and 2,5-dimethyl furan **2a** were purchased from TCI Company. 2,5-Diethylfuran was purchased from Beijing Donghualituo Technology Development Co. Ltd.  $\text{Ph}_3\text{PAuCl}$  was synthesized according to the literature method.<sup>1</sup> 3-Diazooxindoles **1**,<sup>2</sup> *p*-methoxyphenyldiazoacetate **5**<sup>3</sup> and chiral thiourea catalyst **C4**<sup>4</sup> were synthesized according to the literature procedures. TMSCN was purchased from Energy Chemical and was distilled before use.

---

<sup>1</sup> T. N. Hooper, C. P. Butts, M. Green, M. F. Haddow, J. E. McGrady and C. A. Russell, *Chem. Eur. J.*, 2009, **15**, 12196.

<sup>2</sup> R. Augusti and C. Kascheres, *J. Org. Chem.*, 1993, **58**, 7079.

<sup>3</sup> C. C. Jing, D. Xing, Y. Qian, T.-D. Shi, Y. Zhao and W. H. Hu, *Angew. Chem., Int. Ed.*, 2013, **52**, 9289.

<sup>4</sup> a) A. Berkessel, S. Mukherjee, T. N. Müller, F. Cleemann, K. Roland, M. Brandenburg, J.-M. Neudörfel and J. Lex, *Org. Biomol. Chem.*, 2006, **4**, 4319; b) G. Tárkányi, P. Király, S. Varga, B. Vakulya and T. Soós, *Chem. Eur. J.*, 2008, **14**, 6078; c) B. Vakulya, S. Varga and T. Soós, *J. Org. Chem.*, 2008, **73**, 3475; d) A. Peschiulli, C. Quigley, S. Tallon, Y. K. Gun'ko and S. J. Connon, *J. Org. Chem.*, 2008, **73**, 6409; e) B. Vakulya, S. Varga, A. Csámpai and T. Soós, *Org. Lett.*, 2005, **7**, 1967.

### 1) The Au(I)-catalyzed enone formation from diazo reagents **1a** or **5** and 2,5-dimethyl furan **2a**.

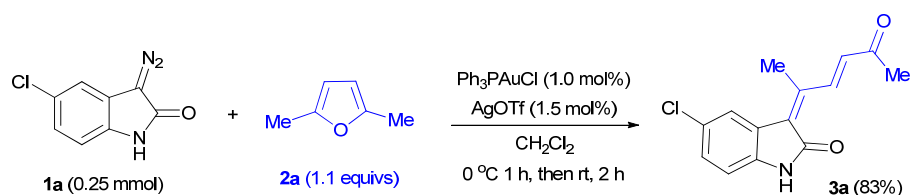

Under an atmosphere of nitrogen, to a Schlenk tube were added  $\text{Ph}_3\text{PAuCl}$  (1.2 mg, 0.0025 mmol) and  $\text{AgOTf}$  (1.0 mg, 0.0038 mmol), followed by anhydrous  $\text{CH}_2\text{Cl}_2$  (2.5 mL). The resulting mixture was stirred at room temperature for 15-20 minutes, and then cooled down to  $0^\circ\text{C}$ , followed by the successive addition of 2,5-dimethylfuran **2a** (0.28 mmol) and diazooxindole **1a** (0.25 mmol, 48.4 mg) in one portion. The reaction was kept stirring at  $-0^\circ\text{C}$  for 1.0 h, and then at rt for 2 h. Column chromatographic purification using  $\text{CH}_2\text{Cl}_2$ /acetone (from 100:1 to 20:1) as the eluent gave product **3a** as red solid (m.p.  $131\text{-}133^\circ\text{C}$ ).  $^1\text{H}$  NMR (400 MHz,  $\text{DMSO-d}_6$ ):  $\delta$  10.81 (s, 1H), 9.23 (d,  $J = 16.4$  Hz, 1H), 7.63 (d,  $J = 2.0$  Hz, 1H), 7.30 (d,  $J = 2.0$  Hz, 1H), 6.85 (d,  $J = 8.0$  Hz, 1H), 6.75 (d,  $J = 2.0$  Hz, 1H), 2.42 (s, 3H), 2.34 (s, 3H);  $^{13}\text{C}$  NMR (100 MHz,  $\text{DMSO-d}_6$ ):  $\delta$  198.54, 167.72, 146.40, 140.91, 139.26, 133.44, 129.35, 127.43, 125.45, 125.17, 124.62, 110.84, 27.83, 16.58; IR (ATR): 3085, 2853, 1674, 1647, 1603, 1251, 1308, 1080; HRMS (ESI): Exact mass calcd for  $\text{C}_{14}\text{H}_{13}\text{NO}_2^{35}\text{Cl}$   $[\text{M}+\text{H}]^+$ : 262.0629, Found: 262.0630.

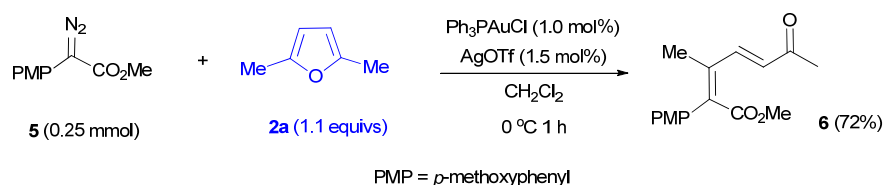

The procedure was similar to that of previous experiment expect that the diazo **5** was added using syringe pump within one hour. The product **6** was obtained as green oil.  $^1\text{H}$  NMR (300 MHz,  $\text{CDCl}_3$ ):  $\delta$  7.76 (ABd,  $J = 16.0$  Hz, 1H), 7.14 (ABd,  $J = 8.5$  Hz, 2H), 6.88 (ABd,  $J = 9.0$  Hz, 2H), 6.31 (ABd,  $J = 16.0$  Hz, 1H), 3.80 (s, 3H), 3.76 (s, 3H), 2.32 (s, 3H), 1.87 (s, 3H);  $^{13}\text{C}$  NMR (100 MHz,  $\text{CDCl}_3$ ):  $\delta$  198.73, 168.60, 159.38, 141.87, 139.33, 136.94, 130.35, 130.17, 128.43, 113.74, 55.15, 52.28, 27.09, 15.94; IR (ATR): 3003, 2952, 2838, 1723, 1593, 1510, 1360, 1248, 1204; GC-MS: 274 ( $\text{M}^+$ , 3), 215 (100), 172 (13), 128 (10), 231 (7), 157 (6), 243 (3), 200 (3); HRMS (EI): Exact mass calcd for  $\text{C}_{16}\text{H}_{18}\text{O}_4$   $[\text{M}]^+$ : 274.1205, Found: 274.1201.

## 2) The assignment of the configuration of enone 6 by NMR analysis

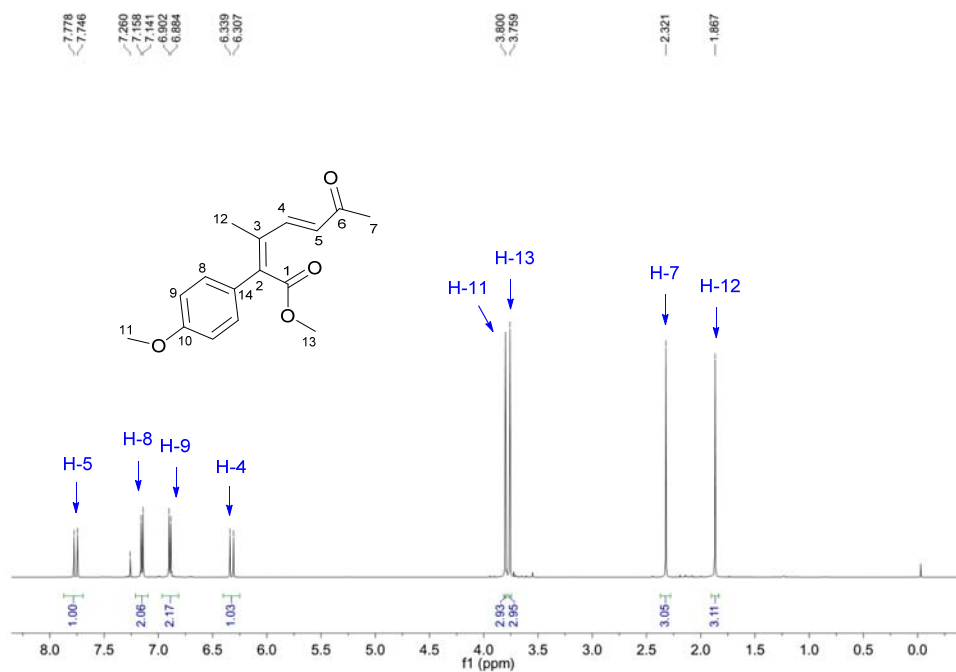

**Figure 1.** <sup>1</sup>H NMR spectrum of **6** (CDCl<sub>3</sub>, 500M HZ)

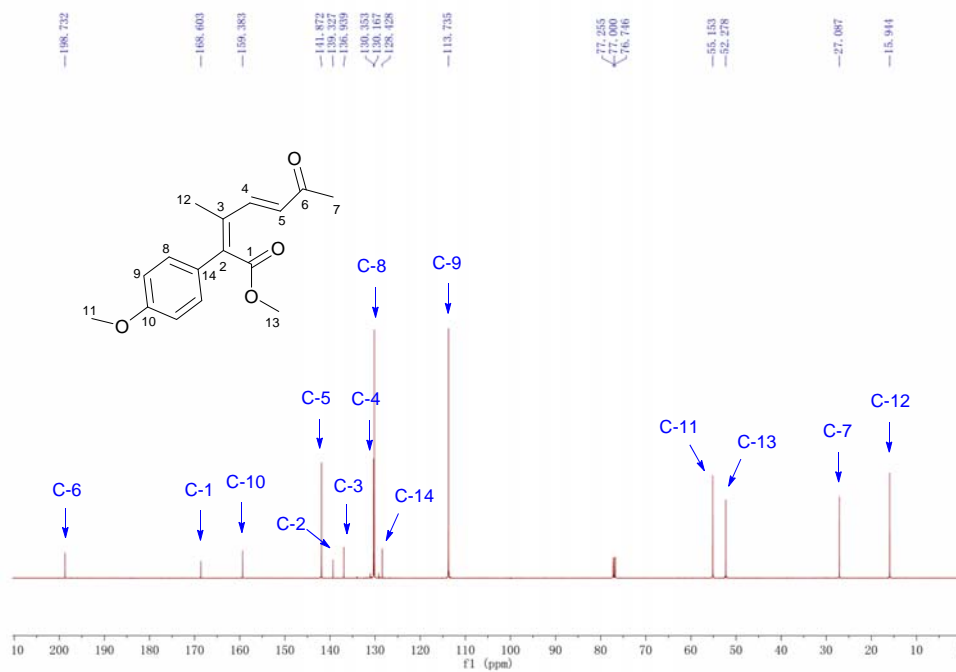

**Figure 2.** <sup>13</sup>C NMR spectrum of **6** (CDCl<sub>3</sub>, 500M HZ)

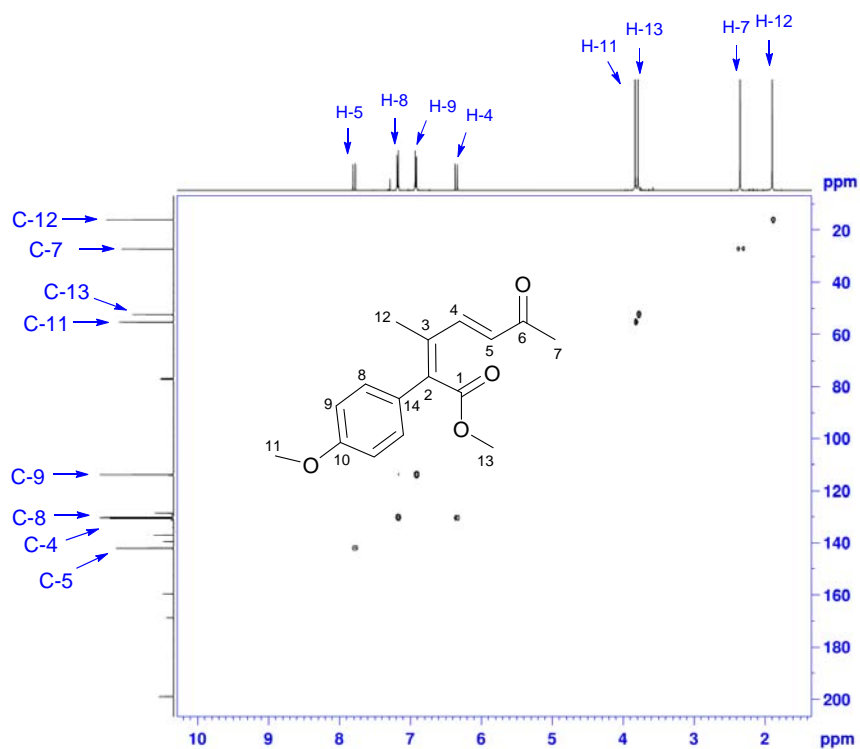

**Figure 3.** HSQC spectrum of 6 (CDCl<sub>3</sub>, 500M HZ)

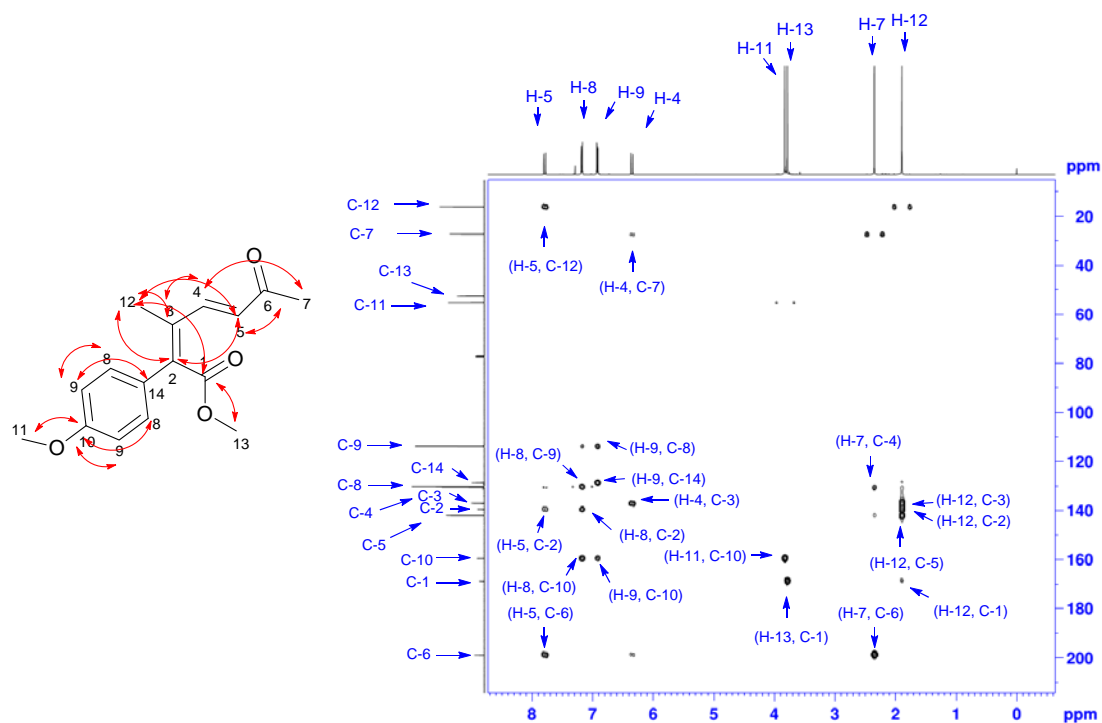

**Figure 4.** HMBC spectrum of 6 (CDCl<sub>3</sub>, 500M HZ)

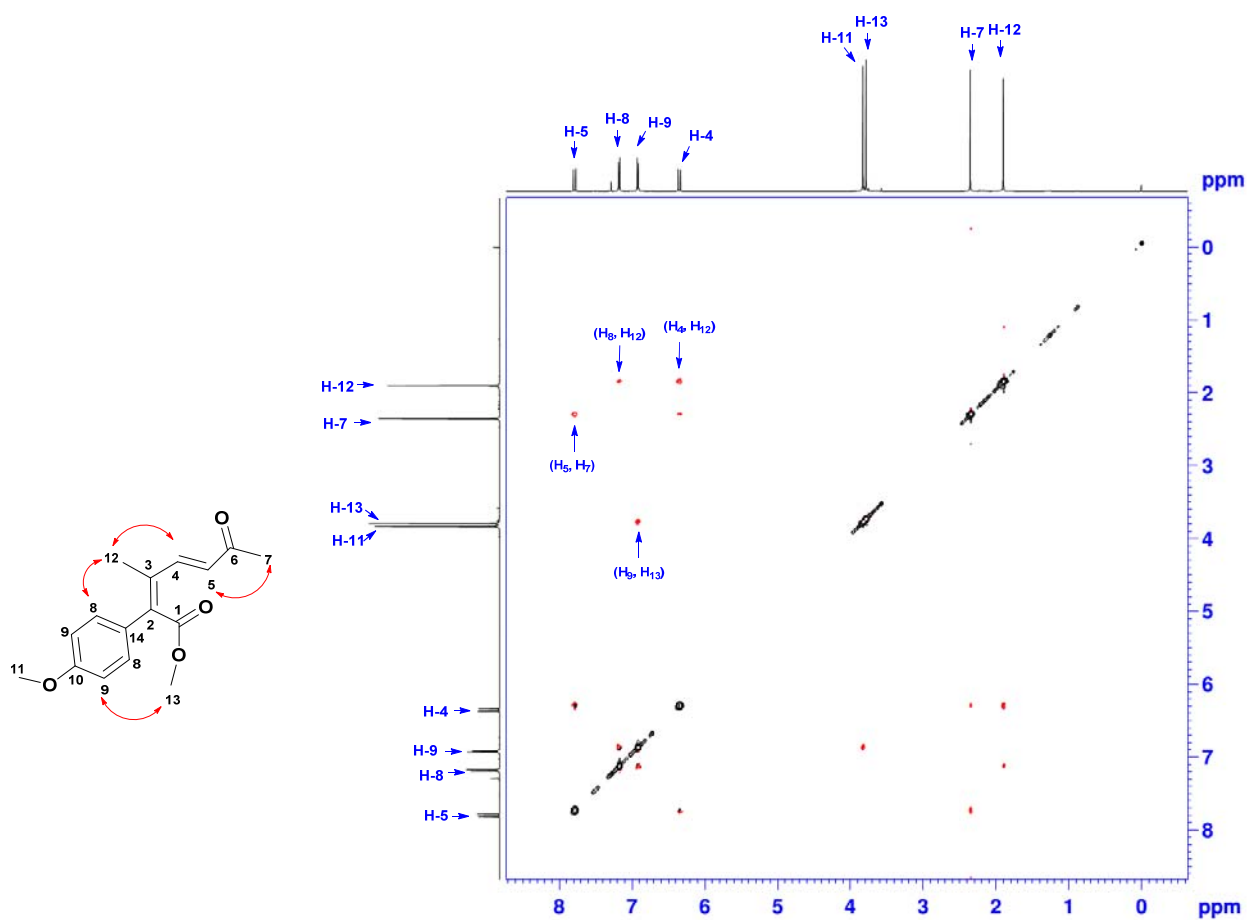

**Figure 5.** Key NOESY correlations of **6** (CDCl<sub>3</sub>, 500M HZ)

### 3) Condition optimization for the asymmetric cyanosilylation reaction.

The asymmetric cyanosilylation reaction of enone **3a** using TMSCN was studied by using a variety of cinchona alkaloid derivatives, see Table S1. For a quick optimization of a suitable catalyst, all the reactions were run in CH<sub>2</sub>Cl<sub>2</sub> at 25 °C using 3.0 equivs of TMSCN, and took a sample for preparative TLC separation to get some product for HPLC analysis after 36 h, no matter the reaction was completed or not. So the conversion was not detected.

**Table S1.** The optimization of chiral catalysts for asymmetric cyanosilylation reaction<sup>a,b</sup>

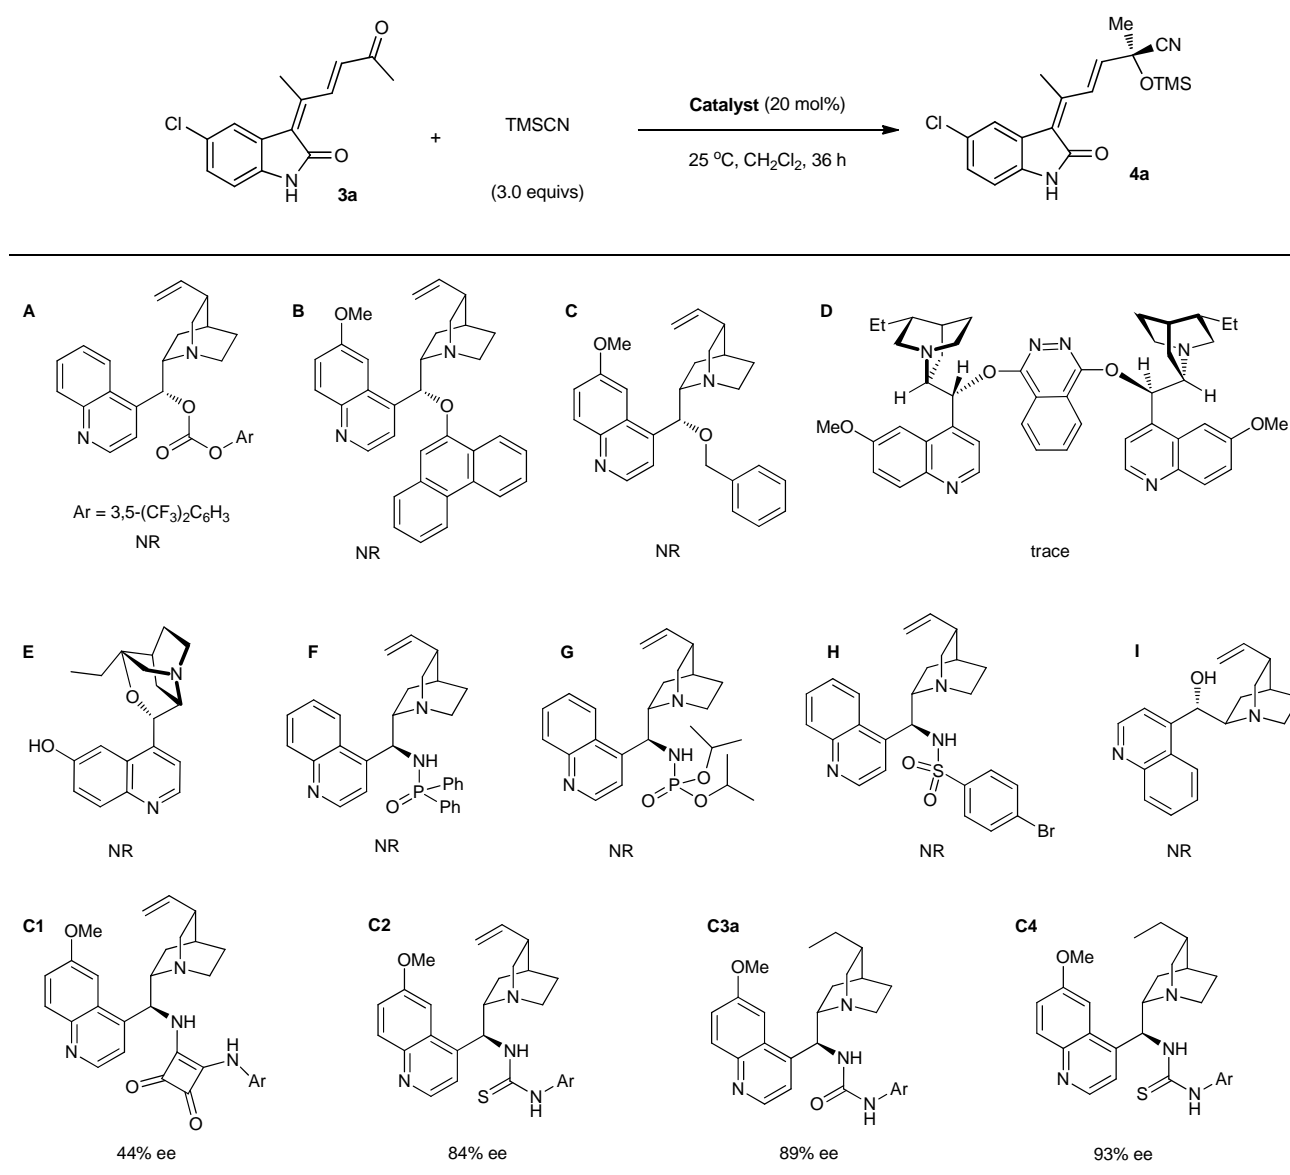

a) 0.05 mmol scale in 0.5 mL of CH<sub>2</sub>Cl<sub>2</sub>; b) Ee value was determined by HPLC analysis.

After screening of a variety of chiral tertiary amine based Lewis bases, cinchona alkaloid derived bifunctional thiourea **C4** proved to be a promising catalyst, which could achieve 93% ee for the desired product **4a**. A similar urea catalyst **C3a** afforded the product **4a** in slightly lower 89% ee, but it could catalyze the reaction in a faster rate. So we use **C3a** for the optimization of reaction solvent, and CH<sub>2</sub>Cl<sub>2</sub> still proved to be the best choice, allowing the reaction to finish within 36 h to give afford product **4a** in 69% yield with 90% ee (entry 1 vs entries 2-6, Table S2). On the other hand, when the corresponding chiral thiourea **C4** was used as the catalyst, the reaction could finish with 60 h, giving the desired product **4a** in 68% yield with 93% ee (entry 7).

**Table S2.** Solvent effects for the asymmetric cyanosilylation reaction

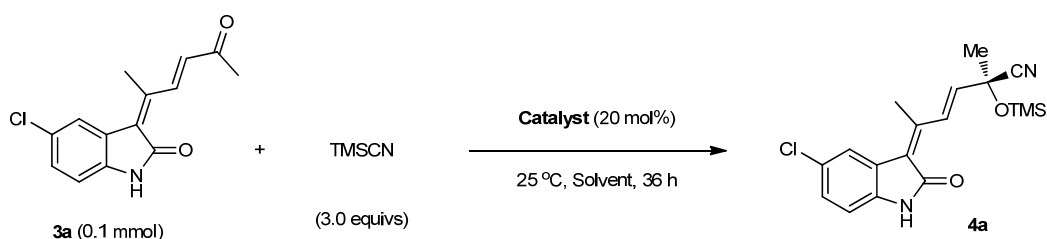

| Entry | Catalyst   | Solvent                         | Yield (%) <sup>a</sup> | Ee (%) <sup>b</sup> |
|-------|------------|---------------------------------|------------------------|---------------------|
| 1     | <b>C3a</b> | CH <sub>2</sub> Cl <sub>2</sub> | 69                     | 90                  |
| 2     | <b>C3a</b> | CH <sub>3</sub> CN              | 68                     | -35                 |
| 3     | <b>C3a</b> | THF                             | trace                  | ND                  |
| 4     | <b>C3a</b> | PhMe                            | 27                     | 71                  |
| 5     | <b>C3a</b> | acetone                         | NR                     | ND                  |
| 6     | <b>C3a</b> | Et <sub>2</sub> O               | NR                     | ND                  |
| 7     | <b>C4</b>  | CH <sub>2</sub> Cl <sub>2</sub> | 68 <sup>c</sup>        | 93                  |

a) Isolated yield; b) Determined by HPLC analysis; c) 60 h.

The above results suggested that the best solvent for the **C4** catalyzed asymmetric cyanosilylation was CH<sub>2</sub>Cl<sub>2</sub>. We further tried using CH<sub>2</sub>Cl<sub>2</sub> as the solvent for the Au(I) catalyzed reaction of 5-chlorodiazooxindole **1a** with 2,5-dimethylfuran **2a**. It was found that under the catalysis of 1.0 mol% of Ph<sub>3</sub>PAuOTf, **1a** worked well with 2,5-dimethylfuran **2a** (1.1 equivs), and the reaction could finish within 2 hours (1 h at 0 °C and 1 h at 25 °C), to afford oxindole based enone **3a** in 83% yield. Therefore, a convenient one-pot cyclopropanation/ring-opening/asymmetric cyanosilylation was developed, without changing the reaction solvent.



#### 4) General procedure for the one-pot enone-formation/cyanosilylation sequence.

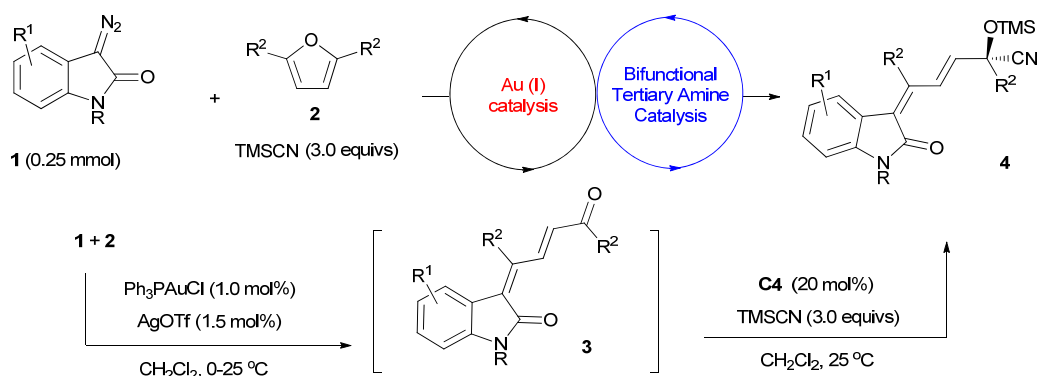

Under nitrogen atmosphere, to a Schlenk tube were added Ph<sub>3</sub>PAuCl (1.2 mg, 0.0025 mmol) and AgOTf (1.0 mg, 0.00375 mmol), followed by anhydrous CH<sub>2</sub>Cl<sub>2</sub> (2.5 mL). The resulting mixture was stirred at room temperature for 15-20 minutes. The reaction was cooled down to 0 °C, followed by the addition of substituted furan **2** (0.28 mmol) and diazooxindole **1** (0.25 mmol). The reaction was kept stirring at 0 °C for about 1 h, and then was warmed to 25 °C for 1-8 hours. Then chiral catalyst **C4** (29.8 mg, 0.05 mmol) and TMSCN (94.0 uL, 0.75 mmol) were added sequentially. The resulting mixture was stirring at 25 °C about 1.5 to 6.5 days till almost full conversion of oxindole-enone **3** by TLC analysis. The mixture was carefully concentrated under reduced pressure. The residue was subjected to column chromatography for purification, using acetone/CH<sub>2</sub>Cl<sub>2</sub> (from 0:1 to 1:100, v:v) or petroleum ether/CH<sub>2</sub>Cl<sub>2</sub> (from 2:1 to 0:1, v:v) as the eluent.

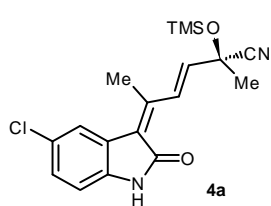

The total reaction time was 7 days. Product **4a** was obtained in 59% yield as yellow solid.  $[\alpha]_D^{25} = -29.0$  ( $c = 0.65$ , CH<sub>2</sub>Cl<sub>2</sub>), m.p. 147-149 °C; HPLC analysis (Chiralpak AD-H, <sup>i</sup>PrOH/hexane = 10/90, 1.0 mL/min, 230 nm;  $t_r$  (major) = 7.79 min,  $t_r$  (minor) = 9.21 min) gave the isomeric composition of the product: 94% ee; <sup>1</sup>H NMR (400 MHz, acetone-d<sub>6</sub>):  $\delta$  9.61 (s, 1H), 8.95 (d,  $J = 16.0$  Hz, 1H), 7.64 (d,  $J = 1.6$  Hz, 1H), 7.24 (d,  $J = 2.0$  Hz, 1H), 6.93 (d,  $J = 8.4$  Hz, 1H), 6.58 (d,  $J = 16.0$  Hz, 1H), 2.51 (s, 3H), 1.78 (s, 3H), 0.28 (s, 9H); <sup>13</sup>C NMR (100 MHz, acetone-d<sub>6</sub>):  $\delta$  168.82, 147.92, 141.40, 139.21, 129.91, 129.39, 126.98, 126.51, 125.78, 125.55, 121.40, 111.44, 70.78, 30.90, 17.39, 1.49; IR (ATR): 3159, 2960, 1684, 1584, 1449, 1254, 1208, 1129; HRMS (ESI): Exact mass calcd for C<sub>18</sub>H<sub>21</sub>N<sub>2</sub>O<sub>2</sub>NaSi<sup>35</sup>Cl

$[M+Na]^+$ : 383.0959, Found: 383.0964.

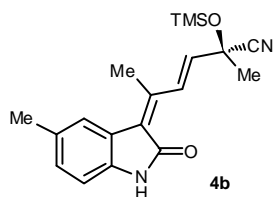

The total reaction time was 3 days. Product **4b** was obtained in 77% yield as yellow solid.  $[\alpha]_D^{25} = -13.3$  ( $c = 0.54$ ,  $CH_2Cl_2$ ), m.p. 203-205 °C; HPLC analysis (Chiralpak AD-H,  $iPrOH$ /hexane = 10/90, 1.0 mL/min, 230 nm;  $t_r$  (major) = 9.06 min,  $t_r$  (minor) = 11.58 min) gave the isomeric composition of the product: 96%

ee;  $^1H$  NMR (400 MHz, acetone- $d_6$ ):  $\delta$  9.38 (s, 1H), 8.99 (d,  $J = 16.0$  Hz, 1H), 7.52 (s, 1H), 7.05 (d,  $J = 8.0$  Hz, 1H), 6.81 (d,  $J = 8.0$  Hz, 1H), 6.47 (d,  $J = 16.0$  Hz, 1H), 2.48 (s, 3H), 2.33 (s, 3H), 1.77 (s, 3H), 0.27 (s, 9H);  $^{13}C$  NMR (100 MHz, acetone- $d_6$ ):  $\delta$  169.23, 145.33, 140.52, 137.69, 131.27, 130.30, 130.26, 126.79, 126.65, 125.09, 121.48, 109.99, 70.78, 30.90, 21.36, 17.20, 1.46; IR (ATR): 3160, 2997, 1681, 1621, 1584, 1453, 1320, 1252; HRMS (ESI): Exact mass calcd for  $C_{19}H_{28}N_3O_2Si$   $[M+NH_4]^+$ : 385.1945, Found: 385.1953.

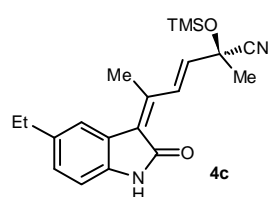

The total reaction time was 3 days. Product **20f** was obtained in 70% yield as yellow solid.  $[\alpha]_D^{25} = -17.4$  ( $c = 0.41$ ,  $CH_2Cl_2$ ), m.p. 178-180 °C; HPLC analysis (Chiralpak AD-H,  $iPrOH$ /hexane = 5/95, 1.0 mL/min, 230 nm;  $t_r$  (major) = 16.04 min,  $t_r$  (minor) = 23.28 min) gave the isomeric composition of the product: 90%

ee;  $^1H$  NMR (400 MHz, acetone- $d_6$ ):  $\delta$  9.39 (s, 1H), 8.99 (d,  $J = 16.0$  Hz, 1H), 7.54 (s, 1H), 7.09 (d,  $J = 8.0$  Hz, 1H), 6.83 (d,  $J = 7.6$  Hz, 1H), 6.47 (d,  $J = 16.0$  Hz, 1H), 2.64 (q,  $J = 7.6$  Hz, 2H), 2.49 (s, 3H), 1.77 (s, 3H), 1.22 (t,  $J = 7.6$  Hz, 3H), 0.27 (s, 9H);  $^{13}C$  NMR (100 MHz, acetone- $d_6$ ):  $\delta$  169.27, 145.29, 140.74, 138.10, 137.66, 130.31, 129.21, 126.72, 125.78, 125.10, 121.48, 110.08, 70.79, 30.90, 17.23, 16.66, 1.47; IR (ATR): 3062, 2932, 1623, 1583, 1457, 1375, 1339, 1209; HRMS (ESI): Exact mass calcd for  $C_{20}H_{30}N_3O_2Si$   $[M+NH_4]^+$ : 372.2102, Found: 372.2108.

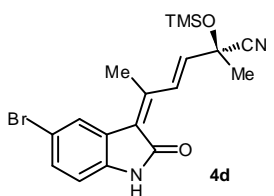

The total reaction time was 5 days. Product **4d** was obtained in 40% yield as yellow solid.  $[\alpha]_D^{25} = -77.4$  ( $c = 0.28$ ,  $CH_2Cl_2$ ), m.p. 206-208 °C; HPLC analysis (Chiralpak AD-H,  $iPrOH$ /hexane = 5/95, 1.0 mL/min, 230 nm;  $t_r$  (major) = 13.53 min,  $t_r$  (minor) = 16.87 min) gave the isomeric composition of the product: 92%

ee;  $^1H$  NMR (400 MHz, acetone- $d_6$ ):  $\delta$  9.63 (s, 1H), 8.95 (d,  $J = 15.6$  Hz, 1H), 7.78 (s, 1H), 7.40 (d,  $J =$

8.0 Hz, 1H), 6.90 (d,  $J = 8.4$  Hz, 1H), 6.58 (d,  $J = 15.6$  Hz, 1H), 2.51 (s, 3H), 1.78 (s, 3H), 0.28 (s, 9H);  $^{13}\text{C}$  NMR (100 MHz, acetone- $d_6$ ):  $\delta$  168.61, 147.91, 141.73, 139.19, 132.24, 129.83, 128.46, 126.93, 125.36, 121.33, 114.21, 111.90, 70.71, 30.84, 17.34, 1.43; IR (ATR): 3084, 1684, 1613, 1564, 1444, 1372, 1308, 1208; HRMS (ESI): Exact mass calcd for  $\text{C}_{18}\text{H}_{25}\text{N}_3\text{O}_2\text{Si}^{79}\text{Br}$   $[\text{M}+\text{NH}_4]^+$ : 422.0894, Found: 422.0898.

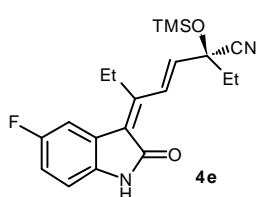

The total reaction time was 3 days. Product **4e** was obtained in 72% yield as yellow solid.  $[\alpha]_{\text{D}}^{25} = -37.3$  ( $c = 0.60$ ,  $\text{CH}_2\text{Cl}_2$ ), m.p. 179-181 °C; HPLC analysis (Chiralpak AD-H,  $i\text{PrOH}/\text{hexane} = 5/95$ , 1.0 mL/min, 230 nm;  $t_{\text{r}}$  (major) = 10.16 min,  $t_{\text{r}}$  (minor) = 13.33 min) gave the isomeric composition of the product: 96%

ee;  $^1\text{H}$  NMR (400 MHz, acetone- $d_6$ ):  $\delta$  9.53 (s, 1H), 8.90 (d,  $J = 16.4$  Hz, 1H), 7.36 (dd,  $J = 10.0, 2.4$  Hz, 1H), 7.03 (td,  $J = 8.4, 2.4$  Hz, 1H), 6.94-6.91 (m, 1H), 6.53 (d,  $J = 16.0$  Hz, 1H), 2.95 (q,  $J = 7.6$  Hz, 2H), 1.97 (q,  $J = 7.6$  Hz, 2H), 1.30 (t,  $J = 7.6$  Hz, 3H), 1.07 (t,  $J = 7.6$  Hz, 3H), 0.28 (s, 9H);  $^{13}\text{C}$  NMR (100 MHz, acetone- $d_6$ ):  $\delta$  169.38, 159.30 (d,  $J_{\text{F-C}} = 233.0$  Hz), 153.30, 139.03, 137.67, 129.48, 125.04 (d,  $J_{\text{F-C}} = 3.0$  Hz), 124.83 (d,  $J_{\text{F-C}} = 8.0$  Hz), 120.50, 115.98 (d,  $J_{\text{F-C}} = 24.0$  Hz), 112.61 (d,  $J_{\text{F-C}} = 26.0$  Hz), 110.85 (d,  $J_{\text{F-C}} = 9.0$  Hz), 75.13, 36.95, 22.41, 13.10, 8.67, 1.36;  $^{19}\text{F}$  NMR (376 MHz, acetone- $d_6$ ):  $\delta$  -123.18; IR (ATR): 3175, 2967, 2933, 1686, 1632, 1491, 1323, 1306, 1276, 1197; HRMS (ESI): Exact mass calcd for  $\text{C}_{20}\text{H}_{29}\text{N}_3\text{O}_2\text{FSi}$   $[\text{M}+\text{NH}_4]^+$ : 390.2008, Found: 390.2014.

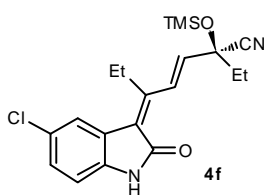

The total reaction time was 3 days. Product **4f** was obtained in 69% yield as yellow solid.  $[\alpha]_{\text{D}}^{25} = -19.2$  ( $c = 0.55$ ,  $\text{CH}_2\text{Cl}_2$ ), m.p. 173-175 °C; HPLC analysis (Chiralpak AD-H,  $i\text{PrOH}/\text{hexane} = 10/90$ , 1.0 mL/min, 230 nm;  $t_{\text{r}}$  (major) = 5.91 min,  $t_{\text{r}}$  (minor) = 7.22 min) gave the isomeric composition of the product: 94% ee;

$^1\text{H}$  NMR (400 MHz, acetone- $d_6$ ):  $\delta$  9.64 (s, 1H), 8.88 (d,  $J = 16.0$  Hz, 1H), 7.56 (d,  $J = 2.0$  Hz, 1H), 7.27 (dd,  $J = 8.0, 1.6$  Hz, 1H), 6.95 (d,  $J = 8.4$  Hz, 1H), 6.54 (d,  $J = 16.0$  Hz, 1H), 2.96 (q, 7.6 Hz, 2H), 1.97 (q,  $J = 7.6$  Hz, 2H), 1.30 (t,  $J = 7.6$  Hz, 3H), 1.07 (t,  $J = 7.6$  Hz, 3H), 0.28 (s, 9H);  $^{13}\text{C}$  NMR (100 MHz, acetone- $d_6$ ):  $\delta$  169.06, 153.60, 141.48, 137.90, 129.47, 129.45, 127.12, 125.45, 125.14, 124.48, 120.50, 111.55, 75.13, 36.96, 23.56, 13.10, 8.67, 1.36; IR (ATR): 3172, 2967, 2873, 1686, 1578, 1419, 1302, 1224, 1127; HRMS (ESI): Exact mass calcd for  $\text{C}_{20}\text{H}_{29}\text{N}_3\text{O}_2\text{Si}^{35}\text{Cl}$   $[\text{M}+\text{NH}_4]^+$ : 406.1712, Found:

406.1717.

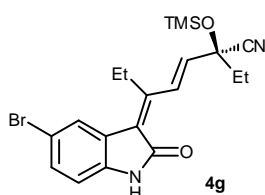

The total reaction time was 3 days. Product **4g** was obtained in 61% yield as yellow solid.  $[\alpha]_D^{25} = -48.9$  ( $c = 0.45$ ,  $\text{CH}_2\text{Cl}_2$ ), m.p. 178-180 °C; HPLC analysis (Chiralpak AD-H,  $^i\text{PrOH}/\text{hexane} = 5/95$ , 1.0 mL/min, 230 nm;  $t_r$  (major) = 9.48 min,  $t_r$  (minor) = 12.11 min) gave the isomeric composition of the product: 93%

ee;  $^1\text{H NMR}$  (400 MHz, acetone- $d_6$ ):  $\delta$  9.67 (s, 1H), 8.88 (d,  $J = 16.0$  Hz, 1H), 7.68 (d,  $J = 1.6$  Hz, 1H), 7.40 (dd,  $J = 8.0, 1.6$  Hz, 1H), 6.91 (d,  $J = 8.4$  Hz, 1H), 6.53 (d,  $J = 16.0$  Hz, 1H), 2.94 (q,  $J = 7.6$  Hz, 2H), 1.97 (q,  $J = 7.6$  Hz, 2H), 1.30 (t,  $J = 7.6$  Hz, 3H), 1.07 (t,  $J = 7.6$  Hz, 3H), 0.28 (s, 9H);  $^{13}\text{C NMR}$  (100 MHz, acetone- $d_6$ ):  $\delta$  168.91, 153.61, 141.81, 137.90, 132.35, 129.39, 127.85, 125.90, 124.31, 120.47, 114.39, 112.05, 75.10, 36.93, 23.56, 13.08, 8.67, 1.36; IR (ATR): 3162, 2971, 1683, 1612, 1482, 1328, 1298, 1251, 1129; HRMS (ESI): Exact mass calcd for  $\text{C}_{20}\text{H}_{29}\text{N}_3\text{O}_2\text{Si}^{79}\text{Br}$   $[\text{M}+\text{NH}_4]^+$ : 450.1207, Found: 450.1211.

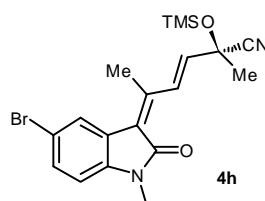

The total reaction time was 1.5 days. Product **4h** was obtained in 87% yield as yellow solid.  $[\alpha]_D^{25} = -4.4$  ( $c = 0.54$ ,  $\text{CH}_2\text{Cl}_2$ ), m.p. 152-154 °C; HPLC analysis (Chiralpak IE,  $^i\text{PrOH}/\text{hexane} = 5/95$ , 1.0 mL/min, 230 nm;  $t_r$  (major) = 27.25 min,  $t_r$  (minor) = 23.69 min) gave the isomeric composition of the product: 95% ee;

$^1\text{H NMR}$  (400 MHz, acetone- $d_6$ ):  $\delta$  8.99 (d,  $J = 15.6$  Hz, 1H), 7.79 (d,  $J = 1.6$  Hz, 1H), 7.48 (dd,  $J = 8.4, 2.0$  Hz, 1H), 6.95 (d,  $J = 8.4$  Hz, 1H), 6.59 (d,  $J = 16.0$  Hz, 1H), 3.22 (s, 3H), 2.52 (s, 3H), 1.79 (s, 3H), 0.28 (s, 9H);  $^{13}\text{C NMR}$  (100 MHz, acetone- $d_6$ ):  $\delta$  167.05, 148.00, 143.31, 139.38, 132.17, 129.84, 128.07, 125.95, 124.66, 121.29, 114.59, 110.45, 70.72, 30.82, 25.95, 17.35, 1.44; IR (ATR): 3435, 2959, 1692, 1606, 1483, 1253, 1214, 1106; HRMS (ESI): Exact mass calcd for  $\text{C}_{19}\text{H}_{27}\text{N}_3\text{O}_2\text{Si}^{79}\text{Br}$   $[\text{M}+\text{NH}_4]^+$ : 436.1050, Found: 436.1053.

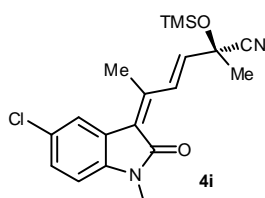

The total reaction time was 2 days. Product **4i** was obtained in 80% yield as yellow solid.  $[\alpha]_D^{25} = -3.6$  ( $c = 0.49$ ,  $\text{CH}_2\text{Cl}_2$ ), m.p. 134-136 °C; HPLC analysis (Chiralpak IE,  $^i\text{PrOH}/\text{hexane} = 10/90$ , 1.0 mL/min, 230 nm;  $t_r$  (major) = 15.39 min,  $t_r$  (minor) = 13.76 min) gave the isomeric composition of the product: 94%

ee;  $^1\text{H NMR}$  (400 MHz, acetone- $d_6$ ):  $\delta$  8.99 (d,  $J = 16.0$  Hz, 1H), 7.66 (d,  $J = 1.6$  Hz, 1H), 7.34 (dd,  $J = 8.4, 2.0$  Hz, 1H), 6.98 (d,  $J = 8.0$  Hz, 1H), 6.60 (d,  $J = 15.6$  Hz, 1H), 3.21 (s, 3H), 2.52 (s, 3H), 1.78 (s,

3H), 0.28 (s, 9H);  $^{13}\text{C}$  NMR (100 MHz, acetone- $d_6$ ):  $\delta$  167.11, 147.89, 142.86, 139.29, 129.87, 129.19, 127.22, 125.45, 125.33, 124.74, 121.29, 109.85, 70.71, 30.82, 25.97, 17.33, 1.45; IR (ATR): 3435, 2961, 1692, 1608, 1485, 1254, 1210, 1141, 1109; HRMS (ESI): Exact mass calcd for  $\text{C}_{19}\text{H}_{27}\text{N}_3\text{O}_2\text{Si}^{35}\text{Cl}$   $[\text{M}+\text{NH}_4]^+$ : 392.1556, Found: 392.1560.

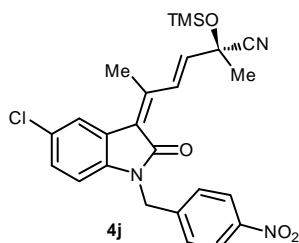

The total reaction time was 3 days. Product **4j** was obtained in 82% yield as yellow solid.  $[\alpha]_D^{25} = -1.4$  ( $c = 0.43$ ,  $\text{CH}_2\text{Cl}_2$ ), m.p. 50-52 °C; HPLC analysis (Chiralpak IE,  $i\text{PrOH}/\text{hexane} = 15/85$ , 1.0 mL/min, 230 nm;  $t_r$  (major) = 27.01 min,  $t_r$  (minor) = 24.89 min) gave the isomeric composition of the product: 92% ee;  $^1\text{H}$  NMR (400 MHz, acetone- $d_6$ ):  $\delta$  9.01 (d,  $J = 16.0$  Hz, 1H), 8.22

(ABd,  $J = 8.8$  Hz, 2H), 7.74 (d,  $J = 2.0$  Hz, 1H), 7.63 (ABd,  $J = 8.8$  Hz, 2H), 7.27 (dd,  $J = 8.4$ , 2.0 Hz, 1H), 6.93 (d,  $J = 8.4$  Hz, 1H), 6.67 (d,  $J = 15.6$  Hz, 1H), 5.19 (s, 2H), 2.59 (s, 3H), 1.80 (s, 3H), 0.29 (s, 9H);  $^{13}\text{C}$  NMR (100 MHz, acetone- $d_6$ ):  $\delta$  167.41, 149.28, 148.36, 145.21, 141.44, 140.08, 129.76, 129.25, 129.19, 127.84, 125.83, 125.77, 124.64, 124.35, 121.26, 110.60, 70.76, 43.12, 30.79, 17.58, 1.45; IR (ATR): 3435, 2960, 1692, 1607, 1525, 1344, 1254, 1109; HRMS (ESI): Exact mass calcd for  $\text{C}_{25}\text{H}_{30}\text{N}_4\text{O}_4\text{Si}^{35}\text{Cl}$   $[\text{M}+\text{NH}_4]^+$ : 513.1719, Found: 513.1719.

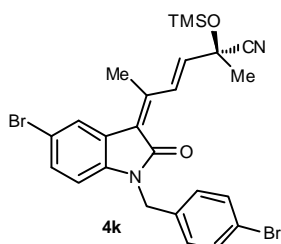

The total reaction time was 2 days. Product **4k** was obtained in 79% yield as yellow oil.  $[\alpha]_D^{25} = +1.9$  ( $c = 0.38$ ,  $\text{CH}_2\text{Cl}_2$ ); HPLC analysis (Chiralpak IE,  $i\text{PrOH}/\text{hexane} = 10/90$ , 1.0 mL/min, 230 nm;  $t_r$  (major) = 12.70 min,  $t_r$  (minor) = 11.94 min) gave the isomeric composition of the product: 94% ee;  $^1\text{H}$  NMR

(400 MHz, acetone- $d_6$ ):  $\delta$  9.01 (d,  $J = 15.6$  Hz, 1H), 7.84 (d,  $J = 1.6$  Hz, 1H), 7.51 (ABd,  $J = 8.4$  Hz, 2H), 7.39 (dd,  $J = 8.4$ , 2.0 Hz, 1H), 7.31 (ABd,  $J = 8.4$  Hz, 2H), 6.87 (d,  $J = 8.4$  Hz, 1H), 6.65 (d,  $J = 16.0$  Hz, 1H), 5.00 (s, 2H), 2.56 (s, 3H), 1.80 (s, 3H), 0.29 (s, 9H);  $^{13}\text{C}$  NMR (100 MHz, acetone- $d_6$ ):  $\delta$  167.21, 148.98, 141.96, 139.87, 136.86, 132.55, 132.09, 130.26, 129.80, 128.35, 126.18, 124.32, 121.70, 121.26, 114.99, 111.16, 70.73, 42.93, 30.79, 17.55, 1.46; IR (ATR): 3466, 2958, 1692, 1604, 1475, 1342, 1254, 1186; HRMS (ESI): Exact mass calcd for  $\text{C}_{25}\text{H}_{30}\text{N}_3\text{O}_2\text{Si}^{79}\text{Br}_2$   $[\text{M}+\text{NH}_4]^+$ : 590.0469, Found: 590.0467.

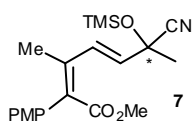

The total reaction time was 4 days. Product **7** was obtained in 75% yield as yellow oil.

$[\alpha]_D^{25} = -4.1$  ( $c = 1.10$ ,  $\text{CH}_2\text{Cl}_2$ ); HPLC analysis (Chiralpak IE,  $i\text{PrOH/hexane} = 3/97$ ,

$1.0 \text{ mL/min}$ ,  $230 \text{ nm}$ ;  $t_r$  (minor) =  $7.13 \text{ min}$ ,  $t_r$  (major) =  $7.45 \text{ min}$ ) gave the isomeric

composition of the product: 46% ee;  $^1\text{H NMR}$  (300 MHz,  $\text{CDCl}_3$ ):  $\delta$  7.26-7.16 (m, 3H), 6.92-6.89 (m,

2H), 5.92-5.86 (m, 1H), 3.82 (s, 3H), 3.77 (s, 3H), 1.85 (s, 3H), 1.72 (s, 3H), 0.26 (s, 9H);  $^{13}\text{C NMR}$

(100 MHz,  $\text{CDCl}_3$ ):  $\delta$  169.01, 159.09, 136.38, 135.23, 132.88, 130.32, 130.19, 128.86, 120.52, 113.68,

69.61, 55.19, 52.13, 30.64, 16.17, 1.27; IR (ATR): 2956, 2841, 1723, 1609, 1151, 1463, 1424, 1304,

1253, 1106; HRMS (ESI): Exact mass calcd for  $\text{C}_{20}\text{H}_{27}\text{NO}_4\text{SiNa}$   $[\text{M}+\text{Na}]^+$ : 396.1607, Found: 396.1607.

## 5) The synthesis of product **8**

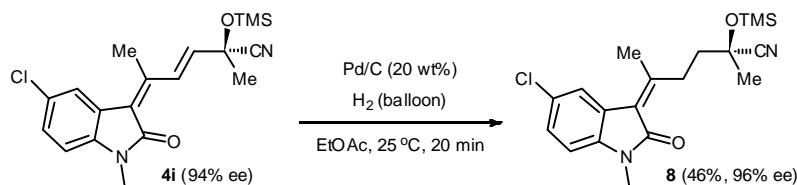

To a stirred solution of **4i** (40 mg, 94% ee) in EtOAc (2.0 mL) was added Pd/C catalyst (10% Pd, 8.0

mg), and back-filled with hydrogen by a  $\text{H}_2$  balloon. The resulting mixture was stirred at  $25 \text{ }^\circ\text{C}$  till

almost full consumption of **4i** by TLC analysis (about 20 min). Then the reaction mixture was directly

subjected to column chromatography using petroleum ether/ $\text{CH}_2\text{Cl}_2$  (from 1:2 to 0:1) as the eluent,

affording 18.3 mg product **8** as yellow oil.  $[\alpha]_D^{25} = -12.1$  ( $c = 0.92$ ,  $\text{CH}_2\text{Cl}_2$ ); HPLC analysis (Chiralpak

OD,  $i\text{PrOH/hexane} = 10/90$ ,  $1.0 \text{ mL/min}$ ,  $230 \text{ nm}$ ;  $t_r$  (major) =  $5.61 \text{ min}$ ,  $t_r$  (minor) =  $6.27 \text{ min}$ ) gave the

isomeric composition of the product: 96% ee;  $^1\text{H NMR}$  (400 MHz,  $\text{CDCl}_3$ ):  $\delta$  7.48 (d,  $J = 2.0 \text{ Hz}$ , 1H),

7.23 (dd,  $J_1 = 8.4 \text{ Hz}$ ,  $J_2 = 2.0 \text{ Hz}$ , 1H), 6.73 (d,  $J = 8.4 \text{ Hz}$ , 1H), 3.36-3.29 (m, 1H), 3.22 (s, 3H),

3.20-3.15 (m, 1H), 2.38 (s, 3H), 2.00-1.95 (m, 2H), 1.69 (s, 3H), 0.25 (s, 9H);  $^{13}\text{C NMR}$  (100 MHz,

$\text{CDCl}_3$ ):  $\delta$  166.76, 157.84, 140.77, 127.51, 126.97, 124.57, 123.77, 122.79, 121.92, 108.33, 69.45, 40.79,

30.94, 28.26, 25.78, 23.54, 1.30; IR (ATR): 2954, 1693, 1806, 1484, 1368, 1335, 1252, 1181, 1104,

1039; HRMS (ESI): Exact mass calcd for  $\text{C}_{19}\text{H}_{25}\text{N}_2\text{O}_2\text{SiNa}^{35}\text{Cl}$   $[\text{M}+\text{Na}]^+$ : 399.1272, Found: 399.1256.

## 6) Single-Crystal X-ray Crystallography of **4i**<sup>5</sup>

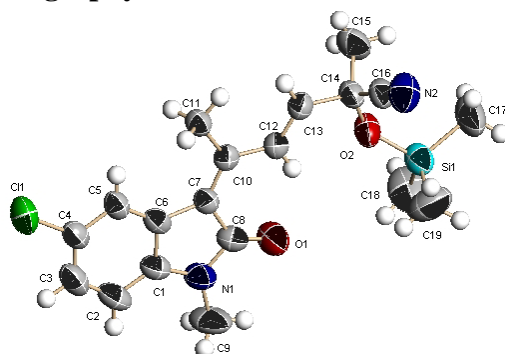

Data intensity of **4i** was collected using a Bruker SMART APEX II (Mo radiation). The X-ray condition of was 50 kV  $\times$  30 mA. Data collection and reduction were done by using the Bruker ApexII software package. The structure was solved by direct methods and refined by full-matrix least-squares on  $F^2$  with anisotropic displacement parameters for non-H atoms using SHELX-97. Hydrogen atoms were added at their geometrically idea positions and refined isotropically. Crystal data for **4i**:  $C_{19}H_{23}ClN_2O_2Si$ ,  $M = 374.93$ ,  $T = 293(2)$  K,  $\lambda = 0.71073$  Å, Orthorhombic, space group P 21 21 2,  $a = 16.4159(14)$  Å,  $b = 36.026(3)$  Å,  $c = 7.0919(6)$  Å,  $V = 4194.2(6)$  Å<sup>3</sup>,  $z = 8$ ,  $d_{\text{calc}} = 1.188$  Mg/m<sup>3</sup>, 24607 reflections measured, 7821 [ $R(\text{int}) = 0.0655$ ],  $R_1 = 0.1189$ ,  $wR_2 = 0.1407$  ( $I > 2\sigma(I)$ ), final  $R_1 = 0.0549$ ,  $wR_2 = 0.1240$ , GOF = 0.900, and 463 parameters.

Table 1. Crystal data and structure refinement for cd214559.

|                      |                            |                  |
|----------------------|----------------------------|------------------|
| Identification code  | cd214559                   |                  |
| Empirical formula    | $C_{19}H_{23}ClN_2O_2Si$   |                  |
| Formula weight       | 374.93                     |                  |
| Temperature          | 293(2) K                   |                  |
| Wavelength           | 0.71073 Å                  |                  |
| Crystal system       | Orthorhombic               |                  |
| Space group          | P 21 21 2                  |                  |
| Unit cell dimensions | $a = 16.4159(14)$ Å        | $a = 90^\circ$ . |
|                      | $b = 36.026(3)$ Å          | $b = 90^\circ$ . |
|                      | $c = 7.0919(6)$ Å          | $g = 90^\circ$ . |
| Volume               | $4194.2(6)$ Å <sup>3</sup> |                  |
| Z                    | 8                          |                  |

<sup>5</sup> Supplementary crystallographic data have been deposited at the Cambridge Crystallographic Data Center. (CCDC1024592).

|                                   |                                                   |
|-----------------------------------|---------------------------------------------------|
| Density (calculated)              | 1.188 Mg/m <sup>3</sup>                           |
| Absorption coefficient            | 0.253 mm <sup>-1</sup>                            |
| F(000)                            | 1584                                              |
| Crystal size                      | 0.211 x 0.154 x 0.112 mm <sup>3</sup>             |
| Theta range for data collection   | 1.678 to 25.500°.                                 |
| Index ranges                      | -19<=h<=19, -43<=k<=40, -8<=l<=8                  |
| Reflections collected             | 24607                                             |
| Independent reflections           | 7821 [R(int) = 0.0655]                            |
| Completeness to theta = 25.242°   | 99.9 %                                            |
| Absorption correction             | Semi-empirical from equivalents                   |
| Max. and min. transmission        | 0.7457 and 0.6323                                 |
| Refinement method                 | Full-matrix least-squares on F <sup>2</sup>       |
| Data / restraints / parameters    | 7821 / 0 / 463                                    |
| Goodness-of-fit on F <sup>2</sup> | 0.900                                             |
| Final R indices [I>2sigma(I)]     | R <sub>1</sub> = 0.0549, wR <sub>2</sub> = 0.1240 |
| R indices (all data)              | R <sub>1</sub> = 0.1189, wR <sub>2</sub> = 0.1407 |
| Absolute structure parameter      | 0.09(6)                                           |
| Extinction coefficient            | n/a                                               |
| Largest diff. peak and hole       | 0.268 and -0.178 e.Å <sup>-3</sup>                |

Table 2. Atomic coordinates ( $\times 10^4$ ) and equivalent isotropic displacement parameters ( $\text{Å}^2 \times 10^3$ ) for cd214559. U(eq) is defined as one third of the trace of the orthogonalized  $U^{ij}$  tensor.

|       | x       | y       | z        | U(eq)  |
|-------|---------|---------|----------|--------|
| Si(1) | 8937(1) | 8638(1) | 9194(3)  | 78(1)  |
| Si(2) | 7844(1) | 82(1)   | 4547(3)  | 93(1)  |
| Cl(1) | 2139(1) | 8130(1) | 10534(3) | 103(1) |
| Cl(2) | 4390(1) | 2775(1) | 5566(3)  | 122(1) |
| N(1)  | 4950(3) | 9122(1) | 9892(7)  | 75(1)  |
| N(2)  | 8564(3) | 7681(2) | 7086(9)  | 98(2)  |
| N(3)  | 4506(3) | 1159(2) | 5003(7)  | 90(2)  |



|       |         |         |           |        |
|-------|---------|---------|-----------|--------|
| N(4)  | 8997(5) | 631(2)  | 8345(11)  | 142(3) |
| O(1)  | 6303(2) | 9005(1) | 9884(7)   | 100(2) |
| O(2)  | 8258(2) | 8374(1) | 10245(6)  | 80(1)  |
| O(3)  | 5590(3) | 758(1)  | 4914(8)   | 112(2) |
| O(4)  | 8010(2) | 526(1)  | 4142(6)   | 87(1)  |
| C(1)  | 4219(3) | 8922(1) | 10020(8)  | 65(1)  |
| C(2)  | 3421(4) | 9055(2) | 10008(8)  | 81(2)  |
| C(3)  | 2789(3) | 8805(2) | 10170(8)  | 81(2)  |
| C(4)  | 2955(3) | 8435(2) | 10357(8)  | 66(1)  |
| C(5)  | 3741(3) | 8296(1) | 10375(7)  | 61(1)  |
| C(6)  | 4390(3) | 8543(1) | 10218(6)  | 54(1)  |
| C(7)  | 5277(2) | 8503(1) | 10169(7)  | 56(1)  |
| C(8)  | 5606(3) | 8893(1) | 9981(8)   | 68(2)  |
| C(9)  | 4993(4) | 9522(1) | 9741(11)  | 114(2) |
| C(10) | 5748(3) | 8191(1) | 10265(6)  | 51(1)  |
| C(11) | 5371(3) | 7815(1) | 10420(8)  | 59(1)  |
| C(12) | 6632(3) | 8222(1) | 10193(7)  | 59(1)  |
| C(13) | 7158(3) | 7949(1) | 10244(7)  | 59(1)  |
| C(14) | 8065(3) | 7997(1) | 10201(8)  | 62(1)  |
| C(15) | 8460(4) | 7794(2) | 11870(9)  | 98(2)  |
| C(16) | 8348(3) | 7818(2) | 8421(10)  | 69(2)  |
| C(17) | 8861(5) | 9075(2) | 10508(14) | 144(3) |
| C(18) | 8659(5) | 8706(2) | 6709(11)  | 140(3) |
| C(19) | 9956(3) | 8427(2) | 9345(12)  | 120(3) |
| C(20) | 4372(3) | 1538(2) | 5151(8)   | 80(2)  |
| C(21) | 3645(3) | 1730(2) | 5214(9)   | 94(2)  |
| C(22) | 3664(4) | 2106(3) | 5343(9)   | 103(2) |
| C(23) | 4391(4) | 2293(2) | 5384(8)   | 82(2)  |
| C(24) | 5131(3) | 2103(2) | 5368(7)   | 70(1)  |
| C(25) | 5137(3) | 1719(2) | 5252(7)   | 66(1)  |
| C(26) | 5779(3) | 1435(1) | 5164(7)   | 63(1)  |
| C(27) | 5322(4) | 1070(2) | 5009(9)   | 85(2)  |
| C(28) | 3865(4) | 876(2)  | 4883(12)  | 138(3) |
| C(29) | 6597(3) | 1470(1) | 5199(7)   | 60(1)  |
| C(30) | 6980(3) | 1847(1) | 5422(9)   | 73(2)  |
| C(31) | 7126(3) | 1148(1) | 5013(7)   | 66(1)  |

|       |         |         |          |        |
|-------|---------|---------|----------|--------|
| C(32) | 7922(3) | 1146(1) | 5287(9)  | 74(2)  |
| C(33) | 8451(3) | 809(2)  | 4982(9)  | 72(2)  |
| C(34) | 9180(4) | 902(2)  | 3756(11) | 113(2) |
| C(35) | 8764(4) | 701(2)  | 6884(12) | 92(2)  |
| C(36) | 8796(5) | -177(2) | 4759(15) | 174(4) |
| C(37) | 7223(6) | 38(3)   | 6715(11) | 166(4) |
| C(38) | 7255(5) | -62(2)  | 2503(11) | 132(3) |

Table 3. Bond lengths [Å] and angles [°] for cd214559.

|             |          |
|-------------|----------|
| Si(1)-O(2)  | 1.646(4) |
| Si(1)-C(17) | 1.832(6) |
| Si(1)-C(18) | 1.837(8) |
| Si(1)-C(19) | 1.840(6) |
| Si(2)-O(4)  | 1.647(4) |
| Si(2)-C(38) | 1.817(7) |
| Si(2)-C(36) | 1.826(7) |
| Si(2)-C(37) | 1.851(8) |
| Cl(1)-C(4)  | 1.737(5) |
| Cl(2)-C(23) | 1.742(6) |
| N(1)-C(8)   | 1.358(6) |
| N(1)-C(1)   | 1.402(6) |
| N(1)-C(9)   | 1.450(6) |
| N(2)-C(16)  | 1.124(7) |
| N(3)-C(27)  | 1.378(7) |
| N(3)-C(20)  | 1.386(7) |
| N(3)-C(28)  | 1.467(7) |
| N(4)-C(35)  | 1.133(9) |
| O(1)-C(8)   | 1.216(6) |
| O(2)-C(14)  | 1.395(5) |
| O(3)-C(27)  | 1.210(7) |
| O(4)-C(33)  | 1.385(6) |
| C(1)-C(2)   | 1.393(7) |
| C(1)-C(6)   | 1.401(6) |
| C(2)-C(3)   | 1.378(7) |
| C(2)-H(2)   | 0.9300   |

|              |          |
|--------------|----------|
| C(3)-C(4)    | 1.367(7) |
| C(3)-H(3)    | 0.9300   |
| C(4)-C(5)    | 1.385(6) |
| C(5)-C(6)    | 1.392(6) |
| C(5)-H(5)    | 0.9300   |
| C(6)-C(7)    | 1.465(6) |
| C(7)-C(10)   | 1.367(6) |
| C(7)-C(8)    | 1.511(7) |
| C(9)-H(9A)   | 0.9600   |
| C(9)-H(9B)   | 0.9600   |
| C(9)-H(9C)   | 0.9600   |
| C(10)-C(12)  | 1.456(6) |
| C(10)-C(11)  | 1.493(6) |
| C(11)-H(11A) | 0.9600   |
| C(11)-H(11B) | 0.9600   |
| C(11)-H(11C) | 0.9600   |
| C(12)-C(13)  | 1.309(6) |
| C(12)-H(12)  | 0.9300   |
| C(13)-C(14)  | 1.499(6) |
| C(13)-H(13)  | 0.9300   |
| C(14)-C(16)  | 1.492(8) |
| C(14)-C(15)  | 1.534(7) |
| C(15)-H(15A) | 0.9600   |
| C(15)-H(15B) | 0.9600   |
| C(15)-H(15C) | 0.9600   |
| C(17)-H(17A) | 0.9600   |
| C(17)-H(17B) | 0.9600   |
| C(17)-H(17C) | 0.9600   |
| C(18)-H(18A) | 0.9600   |
| C(18)-H(18B) | 0.9600   |
| C(18)-H(18C) | 0.9600   |
| C(19)-H(19A) | 0.9600   |
| C(19)-H(19B) | 0.9600   |
| C(19)-H(19C) | 0.9600   |
| C(20)-C(21)  | 1.381(8) |
| C(20)-C(25)  | 1.417(7) |

|              |           |
|--------------|-----------|
| C(21)-C(22)  | 1.357(8)  |
| C(21)-H(21)  | 0.9300    |
| C(22)-C(23)  | 1.371(8)  |
| C(22)-H(22)  | 0.9300    |
| C(23)-C(24)  | 1.394(7)  |
| C(24)-C(25)  | 1.387(7)  |
| C(24)-H(24)  | 0.9300    |
| C(25)-C(26)  | 1.471(7)  |
| C(26)-C(29)  | 1.351(6)  |
| C(26)-C(27)  | 1.516(8)  |
| C(28)-H(28A) | 0.9600    |
| C(28)-H(28B) | 0.9600    |
| C(28)-H(28C) | 0.9600    |
| C(29)-C(31)  | 1.456(6)  |
| C(29)-C(30)  | 1.503(6)  |
| C(30)-H(30A) | 0.9600    |
| C(30)-H(30B) | 0.9600    |
| C(30)-H(30C) | 0.9600    |
| C(31)-C(32)  | 1.321(7)  |
| C(31)-H(31)  | 0.9300    |
| C(32)-C(33)  | 1.508(7)  |
| C(32)-H(32)  | 0.9300    |
| C(33)-C(35)  | 1.495(10) |
| C(33)-C(34)  | 1.518(8)  |
| C(34)-H(34A) | 0.9600    |
| C(34)-H(34B) | 0.9600    |
| C(34)-H(34C) | 0.9600    |
| C(36)-H(36A) | 0.9600    |
| C(36)-H(36B) | 0.9600    |
| C(36)-H(36C) | 0.9600    |
| C(37)-H(37A) | 0.9600    |
| C(37)-H(37B) | 0.9600    |
| C(37)-H(37C) | 0.9600    |
| C(38)-H(38A) | 0.9600    |
| C(38)-H(38B) | 0.9600    |
| C(38)-H(38C) | 0.9600    |

|                   |          |
|-------------------|----------|
| O(2)-Si(1)-C(17)  | 102.7(3) |
| O(2)-Si(1)-C(18)  | 110.0(3) |
| C(17)-Si(1)-C(18) | 110.9(4) |
| O(2)-Si(1)-C(19)  | 110.5(3) |
| C(17)-Si(1)-C(19) | 112.8(4) |
| C(18)-Si(1)-C(19) | 109.7(4) |
| O(4)-Si(2)-C(38)  | 103.0(3) |
| O(4)-Si(2)-C(36)  | 111.5(3) |
| C(38)-Si(2)-C(36) | 112.1(4) |
| O(4)-Si(2)-C(37)  | 108.6(4) |
| C(38)-Si(2)-C(37) | 110.2(4) |
| C(36)-Si(2)-C(37) | 111.1(5) |
| C(8)-N(1)-C(1)    | 111.4(4) |
| C(8)-N(1)-C(9)    | 124.7(4) |
| C(1)-N(1)-C(9)    | 123.8(4) |
| C(27)-N(3)-C(20)  | 112.5(5) |
| C(27)-N(3)-C(28)  | 122.4(6) |
| C(20)-N(3)-C(28)  | 125.1(6) |
| C(14)-O(2)-Si(1)  | 135.0(3) |
| C(33)-O(4)-Si(2)  | 136.6(4) |
| C(2)-C(1)-C(6)    | 121.5(5) |
| C(2)-C(1)-N(1)    | 128.9(5) |
| C(6)-C(1)-N(1)    | 109.5(4) |
| C(3)-C(2)-C(1)    | 118.9(5) |
| C(3)-C(2)-H(2)    | 120.6    |
| C(1)-C(2)-H(2)    | 120.6    |
| C(4)-C(3)-C(2)    | 119.6(5) |
| C(4)-C(3)-H(3)    | 120.2    |
| C(2)-C(3)-H(3)    | 120.2    |
| C(3)-C(4)-C(5)    | 122.6(5) |
| C(3)-C(4)-Cl(1)   | 118.1(4) |
| C(5)-C(4)-Cl(1)   | 119.3(4) |
| C(4)-C(5)-C(6)    | 118.7(4) |
| C(4)-C(5)-H(5)    | 120.6    |
| C(6)-C(5)-H(5)    | 120.6    |

|                     |          |
|---------------------|----------|
| C(5)-C(6)-C(1)      | 118.6(4) |
| C(5)-C(6)-C(7)      | 134.4(4) |
| C(1)-C(6)-C(7)      | 107.1(4) |
| C(10)-C(7)-C(6)     | 130.0(4) |
| C(10)-C(7)-C(8)     | 124.6(4) |
| C(6)-C(7)-C(8)      | 105.4(4) |
| O(1)-C(8)-N(1)      | 122.8(5) |
| O(1)-C(8)-C(7)      | 130.6(4) |
| N(1)-C(8)-C(7)      | 106.6(4) |
| N(1)-C(9)-H(9A)     | 109.5    |
| N(1)-C(9)-H(9B)     | 109.5    |
| H(9A)-C(9)-H(9B)    | 109.5    |
| N(1)-C(9)-H(9C)     | 109.5    |
| H(9A)-C(9)-H(9C)    | 109.5    |
| H(9B)-C(9)-H(9C)    | 109.5    |
| C(7)-C(10)-C(12)    | 119.8(4) |
| C(7)-C(10)-C(11)    | 121.1(4) |
| C(12)-C(10)-C(11)   | 119.1(4) |
| C(10)-C(11)-H(11A)  | 109.5    |
| C(10)-C(11)-H(11B)  | 109.5    |
| H(11A)-C(11)-H(11B) | 109.5    |
| C(10)-C(11)-H(11C)  | 109.5    |
| H(11A)-C(11)-H(11C) | 109.5    |
| H(11B)-C(11)-H(11C) | 109.5    |
| C(13)-C(12)-C(10)   | 126.6(4) |
| C(13)-C(12)-H(12)   | 116.7    |
| C(10)-C(12)-H(12)   | 116.7    |
| C(12)-C(13)-C(14)   | 124.6(4) |
| C(12)-C(13)-H(13)   | 117.7    |
| C(14)-C(13)-H(13)   | 117.7    |
| O(2)-C(14)-C(16)    | 111.7(4) |
| O(2)-C(14)-C(13)    | 109.6(4) |
| C(16)-C(14)-C(13)   | 106.1(4) |
| O(2)-C(14)-C(15)    | 110.4(5) |
| C(16)-C(14)-C(15)   | 108.4(4) |
| C(13)-C(14)-C(15)   | 110.5(5) |

|                     |          |
|---------------------|----------|
| C(14)-C(15)-H(15A)  | 109.5    |
| C(14)-C(15)-H(15B)  | 109.5    |
| H(15A)-C(15)-H(15B) | 109.5    |
| C(14)-C(15)-H(15C)  | 109.5    |
| H(15A)-C(15)-H(15C) | 109.5    |
| H(15B)-C(15)-H(15C) | 109.5    |
| N(2)-C(16)-C(14)    | 179.5(7) |
| Si(1)-C(17)-H(17A)  | 109.5    |
| Si(1)-C(17)-H(17B)  | 109.5    |
| H(17A)-C(17)-H(17B) | 109.5    |
| Si(1)-C(17)-H(17C)  | 109.5    |
| H(17A)-C(17)-H(17C) | 109.5    |
| H(17B)-C(17)-H(17C) | 109.5    |
| Si(1)-C(18)-H(18A)  | 109.5    |
| Si(1)-C(18)-H(18B)  | 109.5    |
| H(18A)-C(18)-H(18B) | 109.5    |
| Si(1)-C(18)-H(18C)  | 109.5    |
| H(18A)-C(18)-H(18C) | 109.5    |
| H(18B)-C(18)-H(18C) | 109.5    |
| Si(1)-C(19)-H(19A)  | 109.5    |
| Si(1)-C(19)-H(19B)  | 109.5    |
| H(19A)-C(19)-H(19B) | 109.5    |
| Si(1)-C(19)-H(19C)  | 109.5    |
| H(19A)-C(19)-H(19C) | 109.5    |
| H(19B)-C(19)-H(19C) | 109.5    |
| C(21)-C(20)-N(3)    | 129.4(6) |
| C(21)-C(20)-C(25)   | 122.2(6) |
| N(3)-C(20)-C(25)    | 108.5(5) |
| C(22)-C(21)-C(20)   | 118.9(6) |
| C(22)-C(21)-H(21)   | 120.6    |
| C(20)-C(21)-H(21)   | 120.6    |
| C(21)-C(22)-C(23)   | 120.8(6) |
| C(21)-C(22)-H(22)   | 119.6    |
| C(23)-C(22)-H(22)   | 119.6    |
| C(22)-C(23)-C(24)   | 121.1(6) |
| C(22)-C(23)-Cl(2)   | 119.4(5) |

|                     |          |
|---------------------|----------|
| C(24)-C(23)-Cl(2)   | 119.5(5) |
| C(25)-C(24)-C(23)   | 119.7(5) |
| C(25)-C(24)-H(24)   | 120.1    |
| C(23)-C(24)-H(24)   | 120.1    |
| C(24)-C(25)-C(20)   | 117.2(5) |
| C(24)-C(25)-C(26)   | 134.6(4) |
| C(20)-C(25)-C(26)   | 108.2(5) |
| C(29)-C(26)-C(25)   | 130.3(5) |
| C(29)-C(26)-C(27)   | 125.1(5) |
| C(25)-C(26)-C(27)   | 104.6(5) |
| O(3)-C(27)-N(3)     | 124.7(6) |
| O(3)-C(27)-C(26)    | 129.1(6) |
| N(3)-C(27)-C(26)    | 106.2(6) |
| N(3)-C(28)-H(28A)   | 109.5    |
| N(3)-C(28)-H(28B)   | 109.5    |
| H(28A)-C(28)-H(28B) | 109.5    |
| N(3)-C(28)-H(28C)   | 109.5    |
| H(28A)-C(28)-H(28C) | 109.5    |
| H(28B)-C(28)-H(28C) | 109.5    |
| C(26)-C(29)-C(31)   | 121.0(4) |
| C(26)-C(29)-C(30)   | 120.2(4) |
| C(31)-C(29)-C(30)   | 118.7(4) |
| C(29)-C(30)-H(30A)  | 109.5    |
| C(29)-C(30)-H(30B)  | 109.5    |
| H(30A)-C(30)-H(30B) | 109.5    |
| C(29)-C(30)-H(30C)  | 109.5    |
| H(30A)-C(30)-H(30C) | 109.5    |
| H(30B)-C(30)-H(30C) | 109.5    |
| C(32)-C(31)-C(29)   | 125.4(5) |
| C(32)-C(31)-H(31)   | 117.3    |
| C(29)-C(31)-H(31)   | 117.3    |
| C(31)-C(32)-C(33)   | 123.5(5) |
| C(31)-C(32)-H(32)   | 118.2    |
| C(33)-C(32)-H(32)   | 118.2    |
| O(4)-C(33)-C(35)    | 112.1(5) |
| O(4)-C(33)-C(32)    | 110.8(4) |



|                     |          |
|---------------------|----------|
| C(35)-C(33)-C(32)   | 106.1(5) |
| O(4)-C(33)-C(34)    | 109.1(5) |
| C(35)-C(33)-C(34)   | 107.6(5) |
| C(32)-C(33)-C(34)   | 111.0(5) |
| C(33)-C(34)-H(34A)  | 109.5    |
| C(33)-C(34)-H(34B)  | 109.5    |
| H(34A)-C(34)-H(34B) | 109.5    |
| C(33)-C(34)-H(34C)  | 109.5    |
| H(34A)-C(34)-H(34C) | 109.5    |
| H(34B)-C(34)-H(34C) | 109.5    |
| N(4)-C(35)-C(33)    | 177.8(8) |
| Si(2)-C(36)-H(36A)  | 109.5    |
| Si(2)-C(36)-H(36B)  | 109.5    |
| H(36A)-C(36)-H(36B) | 109.5    |
| Si(2)-C(36)-H(36C)  | 109.5    |
| H(36A)-C(36)-H(36C) | 109.5    |
| H(36B)-C(36)-H(36C) | 109.5    |
| Si(2)-C(37)-H(37A)  | 109.5    |
| Si(2)-C(37)-H(37B)  | 109.5    |
| H(37A)-C(37)-H(37B) | 109.5    |
| Si(2)-C(37)-H(37C)  | 109.5    |
| H(37A)-C(37)-H(37C) | 109.5    |
| H(37B)-C(37)-H(37C) | 109.5    |
| Si(2)-C(38)-H(38A)  | 109.5    |
| Si(2)-C(38)-H(38B)  | 109.5    |
| H(38A)-C(38)-H(38B) | 109.5    |
| Si(2)-C(38)-H(38C)  | 109.5    |
| H(38A)-C(38)-H(38C) | 109.5    |
| H(38B)-C(38)-H(38C) | 109.5    |

---

Symmetry transformations used to generate equivalent atoms:

Table 4. Anisotropic displacement parameters ( $\text{\AA}^2 \times 10^3$ ) for cd214559. The anisotropic displacement factor exponent takes the form:  $-2p^2 [ h^2 a^* 2U^{11} + \dots + 2 h k a^* b^* U^{12} ]$

---

|     |     |     |     |     |     |
|-----|-----|-----|-----|-----|-----|
| U11 | U22 | U33 | U23 | U13 | U12 |
|-----|-----|-----|-----|-----|-----|

---

|       |        |        |         |        |        |        |
|-------|--------|--------|---------|--------|--------|--------|
| Si(1) | 61(1)  | 66(1)  | 108(1)  | -8(1)  | -6(1)  | -7(1)  |
| Si(2) | 115(1) | 70(1)  | 95(1)   | -8(1)  | -3(1)  | 4(1)   |
| Cl(1) | 56(1)  | 127(1) | 126(1)  | 2(1)   | 1(1)   | -2(1)  |
| Cl(2) | 101(1) | 132(2) | 132(2)  | -11(1) | -3(1)  | 50(1)  |
| N(1)  | 76(3)  | 53(3)  | 95(4)   | 3(3)   | -2(3)  | 9(2)   |
| N(2)  | 95(4)  | 93(4)  | 107(5)  | -30(3) | 22(4)  | -4(3)  |
| N(3)  | 72(3)  | 117(4) | 79(4)   | 15(3)  | 0(3)   | -35(3) |
| N(4)  | 167(7) | 129(5) | 130(6)  | -15(5) | -60(5) | 18(4)  |
| O(1)  | 70(2)  | 63(2)  | 167(5)  | 1(3)   | -7(3)  | -13(2) |
| O(2)  | 60(2)  | 69(2)  | 111(3)  | -17(2) | 14(2)  | -5(2)  |
| O(3)  | 111(3) | 84(3)  | 141(5)  | 0(3)   | -3(3)  | -36(3) |
| O(4)  | 101(3) | 61(2)  | 98(3)   | -12(2) | -14(3) | -1(2)  |
| C(1)  | 73(3)  | 61(3)  | 62(4)   | 2(3)   | -1(3)  | 18(3)  |
| C(2)  | 91(4)  | 78(4)  | 75(5)   | -3(3)  | -7(4)  | 35(3)  |
| C(3)  | 59(3)  | 110(5) | 73(4)   | 0(4)   | -6(3)  | 21(3)  |
| C(4)  | 59(3)  | 85(4)  | 55(3)   | 3(3)   | 0(3)   | 16(3)  |
| C(5)  | 51(3)  | 78(3)  | 55(3)   | -2(3)  | -3(3)  | 8(3)   |
| C(6)  | 56(3)  | 68(3)  | 39(3)   | -2(3)  | -6(3)  | 12(2)  |
| C(7)  | 51(3)  | 60(3)  | 56(3)   | -3(3)  | -4(3)  | 3(2)   |
| C(8)  | 74(4)  | 58(3)  | 72(4)   | 2(3)   | -6(4)  | 3(3)   |
| C(9)  | 115(4) | 53(4)  | 173(7)  | 17(4)  | -20(6) | 7(3)   |
| C(10) | 57(3)  | 62(3)  | 35(3)   | -3(2)  | -1(2)  | 0(2)   |
| C(11) | 52(3)  | 57(3)  | 68(3)   | -2(3)  | -1(3)  | 0(2)   |
| C(12) | 55(3)  | 62(3)  | 59(4)   | 1(3)   | 5(3)   | 0(2)   |
| C(13) | 53(3)  | 62(3)  | 62(4)   | 2(3)   | 6(3)   | -3(2)  |
| C(14) | 51(3)  | 57(3)  | 80(4)   | -1(3)  | 0(3)   | 2(2)   |
| C(15) | 79(5)  | 129(6) | 85(5)   | 20(4)  | -16(4) | 21(4)  |
| C(16) | 59(3)  | 61(4)  | 85(5)   | -5(3)  | 11(3)  | 5(3)   |
| C(17) | 137(6) | 82(5)  | 211(10) | -52(6) | -1(7)  | -13(4) |
| C(18) | 165(8) | 127(6) | 129(7)  | 47(5)  | -21(6) | -31(5) |
| C(19) | 57(3)  | 116(5) | 188(8)  | -6(6)  | 0(5)   | -8(3)  |
| C(20) | 74(4)  | 120(5) | 45(4)   | 9(4)   | -6(3)  | -19(4) |
| C(21) | 48(3)  | 156(6) | 79(5)   | 6(5)   | -3(3)  | -10(4) |
| C(22) | 73(4)  | 169(7) | 67(4)   | 12(5)  | -2(4)  | 20(5)  |
| C(23) | 73(4)  | 121(5) | 51(4)   | 4(3)   | 0(4)   | 8(4)   |

|       |         |        |         |        |        |        |
|-------|---------|--------|---------|--------|--------|--------|
| C(24) | 58(3)   | 104(5) | 50(3)   | -5(3)  | -6(3)  | 2(3)   |
| C(25) | 55(3)   | 104(5) | 39(3)   | -3(3)  | 5(3)   | -15(3) |
| C(26) | 62(3)   | 78(3)  | 48(3)   | 6(3)   | 0(3)   | -13(3) |
| C(27) | 92(5)   | 97(5)  | 65(4)   | 9(4)   | 6(4)   | -25(4) |
| C(28) | 106(5)  | 152(6) | 154(8)  | 11(6)  | -12(6) | -73(5) |
| C(29) | 63(3)   | 70(3)  | 48(3)   | 1(3)   | 4(3)   | -7(3)  |
| C(30) | 59(3)   | 67(3)  | 93(4)   | 0(3)   | -6(3)  | 0(2)   |
| C(31) | 72(4)   | 59(3)  | 67(4)   | -3(3)  | 6(3)   | -7(3)  |
| C(32) | 76(4)   | 60(3)  | 87(4)   | -1(3)  | -1(4)  | -7(3)  |
| C(33) | 75(4)   | 76(4)  | 66(4)   | -1(3)  | -5(4)  | 3(3)   |
| C(34) | 86(5)   | 122(6) | 130(7)  | 6(5)   | 13(4)  | 18(4)  |
| C(35) | 93(5)   | 75(4)  | 109(6)  | -11(4) | -9(5)  | 7(4)   |
| C(36) | 175(7)  | 107(6) | 239(12) | -34(7) | -45(9) | 54(5)  |
| C(37) | 206(10) | 188(9) | 102(6)  | 1(6)   | 50(6)  | -57(8) |
| C(38) | 185(8)  | 95(5)  | 115(6)  | -21(5) | -21(6) | -30(5) |

Table 5. Hydrogen coordinates ( $\times 10^4$ ) and isotropic displacement parameters ( $\text{\AA}^2 \times 10^3$ ) for cd214559.

|        | x    | y    | z     | U(eq) |
|--------|------|------|-------|-------|
| H(2)   | 3318 | 9308 | 9893  | 98    |
| H(3)   | 2252 | 8888 | 10151 | 97    |
| H(5)   | 3835 | 8043 | 10489 | 73    |
| H(9A)  | 4774 | 9633 | 10863 | 170   |
| H(9B)  | 4683 | 9603 | 8668  | 170   |
| H(9C)  | 5551 | 9597 | 9590  | 170   |
| H(11A) | 5097 | 7793 | 11611 | 88    |
| H(11B) | 5788 | 7629 | 10333 | 88    |
| H(11C) | 4986 | 7781 | 9416  | 88    |
| H(12)  | 6845 | 8461 | 10102 | 71    |
| H(13)  | 6954 | 7709 | 10313 | 71    |
| H(15A) | 9042 | 7803 | 11742 | 147   |
| H(15B) | 8283 | 7541 | 11887 | 147   |
| H(15C) | 8304 | 7913 | 13026 | 147   |
| H(17A) | 8332 | 9181 | 10315 | 215   |

|        |       |      |       |     |
|--------|-------|------|-------|-----|
| H(17B) | 9271  | 9244 | 10071 | 215 |
| H(17C) | 8940  | 9027 | 11828 | 215 |
| H(18A) | 8656  | 8470 | 6075  | 211 |
| H(18B) | 9047  | 8867 | 6118  | 211 |
| H(18C) | 8126  | 8815 | 6635  | 211 |
| H(19A) | 10099 | 8392 | 10645 | 180 |
| H(19B) | 10347 | 8588 | 8756  | 180 |
| H(19C) | 9952  | 8191 | 8713  | 180 |
| H(21)  | 3151  | 1605 | 5168  | 113 |
| H(22)  | 3178  | 2238 | 5405  | 123 |
| H(24)  | 5619  | 2234 | 5434  | 84  |
| H(28A) | 4110  | 636  | 4746  | 206 |
| H(28B) | 3524  | 926  | 3813  | 206 |
| H(28C) | 3542  | 882  | 6011  | 206 |
| H(30A) | 6843  | 1999 | 4356  | 110 |
| H(30B) | 7561  | 1821 | 5500  | 110 |
| H(30C) | 6781  | 1961 | 6554  | 110 |
| H(31)  | 6883  | 925  | 4672  | 79  |
| H(32)  | 8170  | 1364 | 5689  | 89  |
| H(34A) | 9510  | 684  | 3594  | 169 |
| H(34B) | 9497  | 1092 | 4351  | 169 |
| H(34C) | 8996  | 987  | 2547  | 169 |
| H(36A) | 9149  | -113 | 3729  | 260 |
| H(36B) | 8684  | -438 | 4731  | 260 |
| H(36C) | 9057  | -114 | 5929  | 260 |
| H(37A) | 7365  | 233  | 7579  | 248 |
| H(37B) | 7325  | -198 | 7292  | 248 |
| H(37C) | 6656  | 57   | 6398  | 248 |
| H(38A) | 6704  | 24   | 2632  | 198 |
| H(38B) | 7259  | -328 | 2414  | 198 |
| H(38C) | 7492  | 43   | 1384  | 198 |

---

Table 6. Torsion angles [°] for cd214559.

---

|                        |           |
|------------------------|-----------|
| C(17)-Si(1)-O(2)-C(14) | -168.5(5) |
| C(18)-Si(1)-O(2)-C(14) | 73.3(6)   |

|                        |           |
|------------------------|-----------|
| C(19)-Si(1)-O(2)-C(14) | -48.0(6)  |
| C(38)-Si(2)-O(4)-C(33) | -174.6(6) |
| C(36)-Si(2)-O(4)-C(33) | -54.3(7)  |
| C(37)-Si(2)-O(4)-C(33) | 68.5(6)   |
| C(8)-N(1)-C(1)-C(2)    | 179.1(6)  |
| C(9)-N(1)-C(1)-C(2)    | 0.8(9)    |
| C(8)-N(1)-C(1)-C(6)    | 0.5(6)    |
| C(9)-N(1)-C(1)-C(6)    | -177.8(5) |
| C(6)-C(1)-C(2)-C(3)    | -0.9(9)   |
| N(1)-C(1)-C(2)-C(3)    | -179.4(5) |
| C(1)-C(2)-C(3)-C(4)    | 0.7(9)    |
| C(2)-C(3)-C(4)-C(5)    | -0.7(9)   |
| C(2)-C(3)-C(4)-Cl(1)   | -179.4(5) |
| C(3)-C(4)-C(5)-C(6)    | 0.8(8)    |
| Cl(1)-C(4)-C(5)-C(6)   | 179.5(4)  |
| C(4)-C(5)-C(6)-C(1)    | -1.0(7)   |
| C(4)-C(5)-C(6)-C(7)    | -179.5(5) |
| C(2)-C(1)-C(6)-C(5)    | 1.1(8)    |
| N(1)-C(1)-C(6)-C(5)    | 179.8(5)  |
| C(2)-C(1)-C(6)-C(7)    | 179.9(5)  |
| N(1)-C(1)-C(6)-C(7)    | -1.3(6)   |
| C(5)-C(6)-C(7)-C(10)   | 0.2(10)   |
| C(1)-C(6)-C(7)-C(10)   | -178.4(5) |
| C(5)-C(6)-C(7)-C(8)    | -179.8(5) |
| C(1)-C(6)-C(7)-C(8)    | 1.6(5)    |
| C(1)-N(1)-C(8)-O(1)    | 179.4(6)  |
| C(9)-N(1)-C(8)-O(1)    | -2.3(9)   |
| C(1)-N(1)-C(8)-C(7)    | 0.6(6)    |
| C(9)-N(1)-C(8)-C(7)    | 178.8(5)  |
| C(10)-C(7)-C(8)-O(1)   | 0.0(10)   |
| C(6)-C(7)-C(8)-O(1)    | 179.9(6)  |
| C(10)-C(7)-C(8)-N(1)   | 178.7(5)  |
| C(6)-C(7)-C(8)-N(1)    | -1.3(6)   |
| C(6)-C(7)-C(10)-C(12)  | -179.8(5) |
| C(8)-C(7)-C(10)-C(12)  | 0.2(8)    |
| C(6)-C(7)-C(10)-C(11)  | 1.0(8)    |

|                         |           |
|-------------------------|-----------|
| C(8)-C(7)-C(10)-C(11)   | -179.0(5) |
| C(7)-C(10)-C(12)-C(13)  | -179.0(5) |
| C(11)-C(10)-C(12)-C(13) | 0.3(8)    |
| C(10)-C(12)-C(13)-C(14) | -178.9(5) |
| Si(1)-O(2)-C(14)-C(16)  | -22.8(7)  |
| Si(1)-O(2)-C(14)-C(13)  | -140.2(4) |
| Si(1)-O(2)-C(14)-C(15)  | 97.9(6)   |
| C(12)-C(13)-C(14)-O(2)  | 4.5(8)    |
| C(12)-C(13)-C(14)-C(16) | -116.2(6) |
| C(12)-C(13)-C(14)-C(15) | 126.5(6)  |
| C(27)-N(3)-C(20)-C(21)  | -179.2(6) |
| C(28)-N(3)-C(20)-C(21)  | -0.1(10)  |
| C(27)-N(3)-C(20)-C(25)  | 0.4(7)    |
| C(28)-N(3)-C(20)-C(25)  | 179.5(6)  |
| N(3)-C(20)-C(21)-C(22)  | -179.3(6) |
| C(25)-C(20)-C(21)-C(22) | 1.2(9)    |
| C(20)-C(21)-C(22)-C(23) | 0.9(10)   |
| C(21)-C(22)-C(23)-C(24) | -2.5(10)  |
| C(21)-C(22)-C(23)-Cl(2) | -179.6(5) |
| C(22)-C(23)-C(24)-C(25) | 1.9(8)    |
| Cl(2)-C(23)-C(24)-C(25) | 179.0(4)  |
| C(23)-C(24)-C(25)-C(20) | 0.1(8)    |
| C(23)-C(24)-C(25)-C(26) | 178.5(5)  |
| C(21)-C(20)-C(25)-C(24) | -1.6(8)   |
| N(3)-C(20)-C(25)-C(24)  | 178.7(5)  |
| C(21)-C(20)-C(25)-C(26) | 179.5(5)  |
| N(3)-C(20)-C(25)-C(26)  | -0.1(6)   |
| C(24)-C(25)-C(26)-C(29) | 1.1(10)   |
| C(20)-C(25)-C(26)-C(29) | 179.6(5)  |
| C(24)-C(25)-C(26)-C(27) | -178.7(6) |
| C(20)-C(25)-C(26)-C(27) | -0.2(6)   |
| C(20)-N(3)-C(27)-O(3)   | 179.2(6)  |
| C(28)-N(3)-C(27)-O(3)   | 0.1(11)   |
| C(20)-N(3)-C(27)-C(26)  | -0.5(7)   |
| C(28)-N(3)-C(27)-C(26)  | -179.6(5) |
| C(29)-C(26)-C(27)-O(3)  | 0.9(11)   |

|                         |           |
|-------------------------|-----------|
| C(25)-C(26)-C(27)-O(3)  | -179.3(7) |
| C(29)-C(26)-C(27)-N(3)  | -179.4(5) |
| C(25)-C(26)-C(27)-N(3)  | 0.4(6)    |
| C(25)-C(26)-C(29)-C(31) | -177.4(5) |
| C(27)-C(26)-C(29)-C(31) | 2.4(9)    |
| C(25)-C(26)-C(29)-C(30) | 2.3(9)    |
| C(27)-C(26)-C(29)-C(30) | -178.0(5) |
| C(26)-C(29)-C(31)-C(32) | -170.1(6) |
| C(30)-C(29)-C(31)-C(32) | 10.2(8)   |
| C(29)-C(31)-C(32)-C(33) | -176.8(5) |
| Si(2)-O(4)-C(33)-C(35)  | -10.5(8)  |
| Si(2)-O(4)-C(33)-C(32)  | -128.9(5) |
| Si(2)-O(4)-C(33)-C(34)  | 108.6(6)  |
| C(31)-C(32)-C(33)-O(4)  | 8.3(8)    |
| C(31)-C(32)-C(33)-C(35) | -113.6(7) |
| C(31)-C(32)-C(33)-C(34) | 129.7(7)  |

---

Symmetry transformations used to generate equivalent atoms:

Table 7. Hydrogen bonds for cd214559 [ $\text{\AA}$  and  $^\circ$ ].

---

| D-H...A | d(D-H) | d(H...A) | d(D...A) | $\angle$ (DHA) |
|---------|--------|----------|----------|----------------|
|---------|--------|----------|----------|----------------|

---

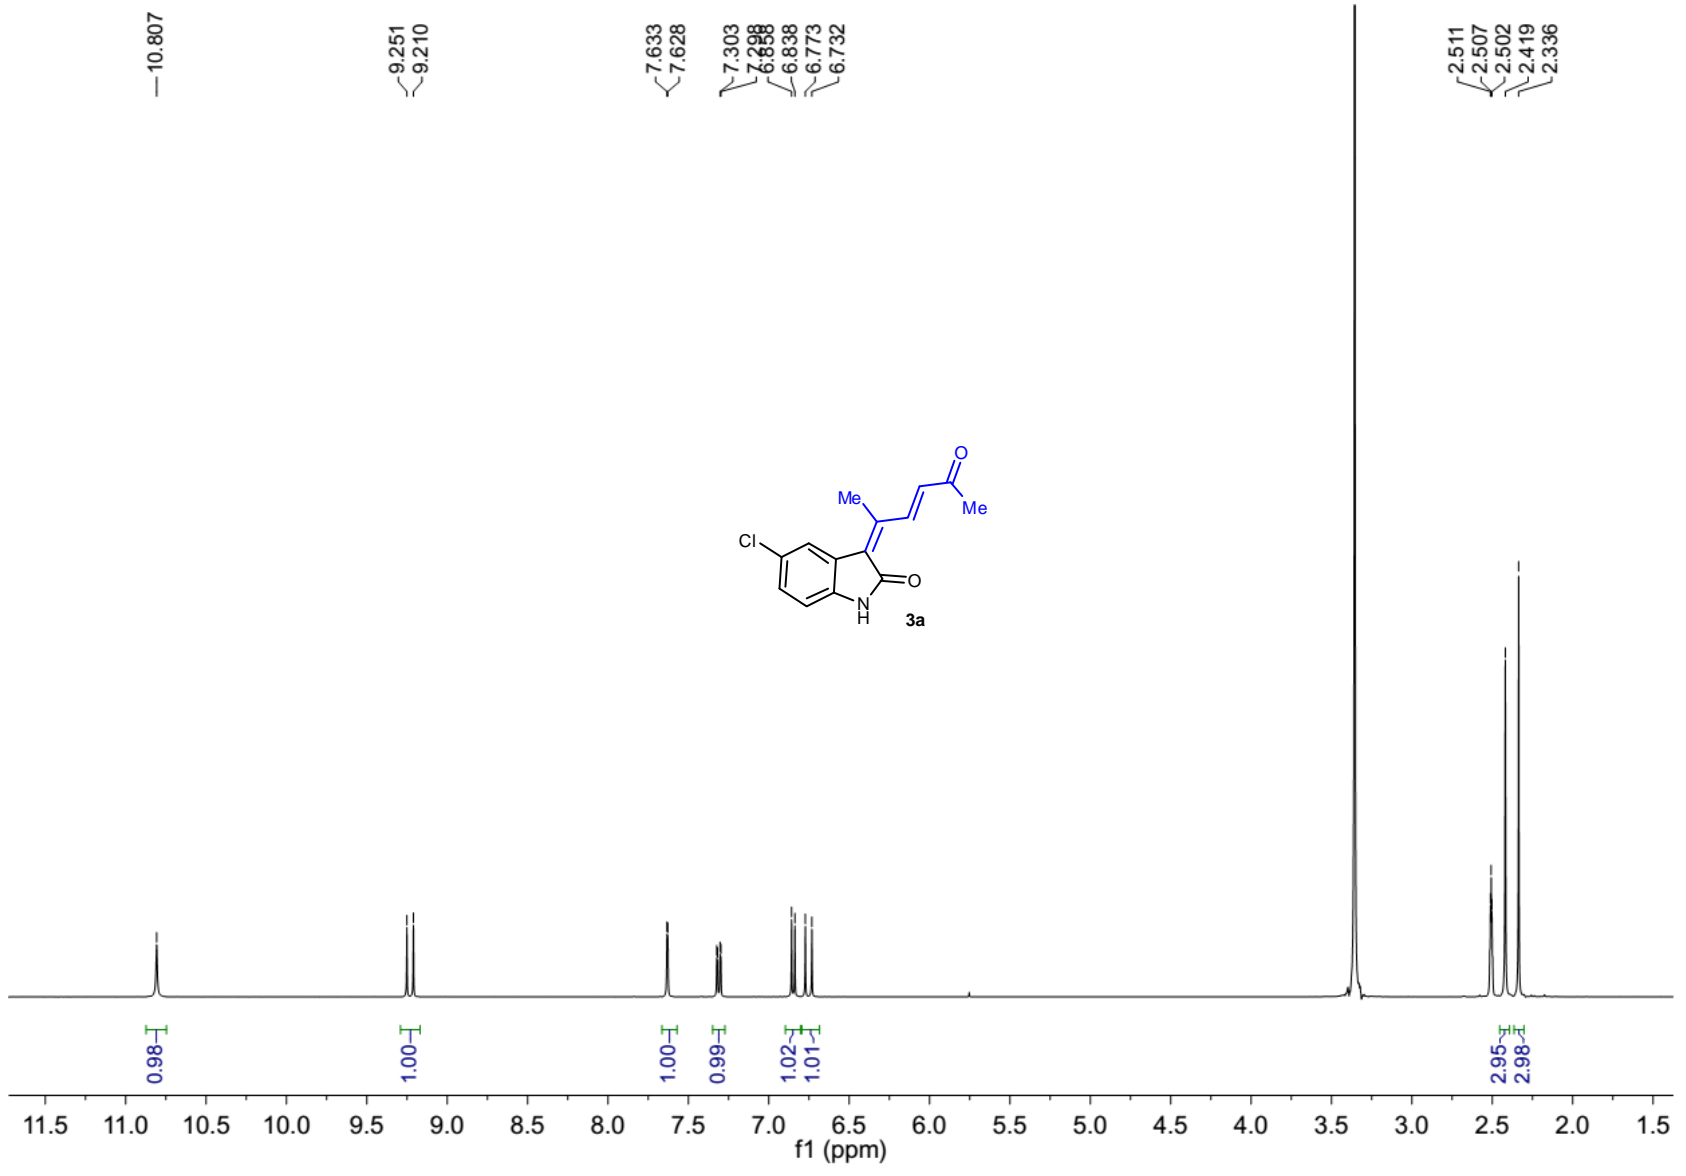



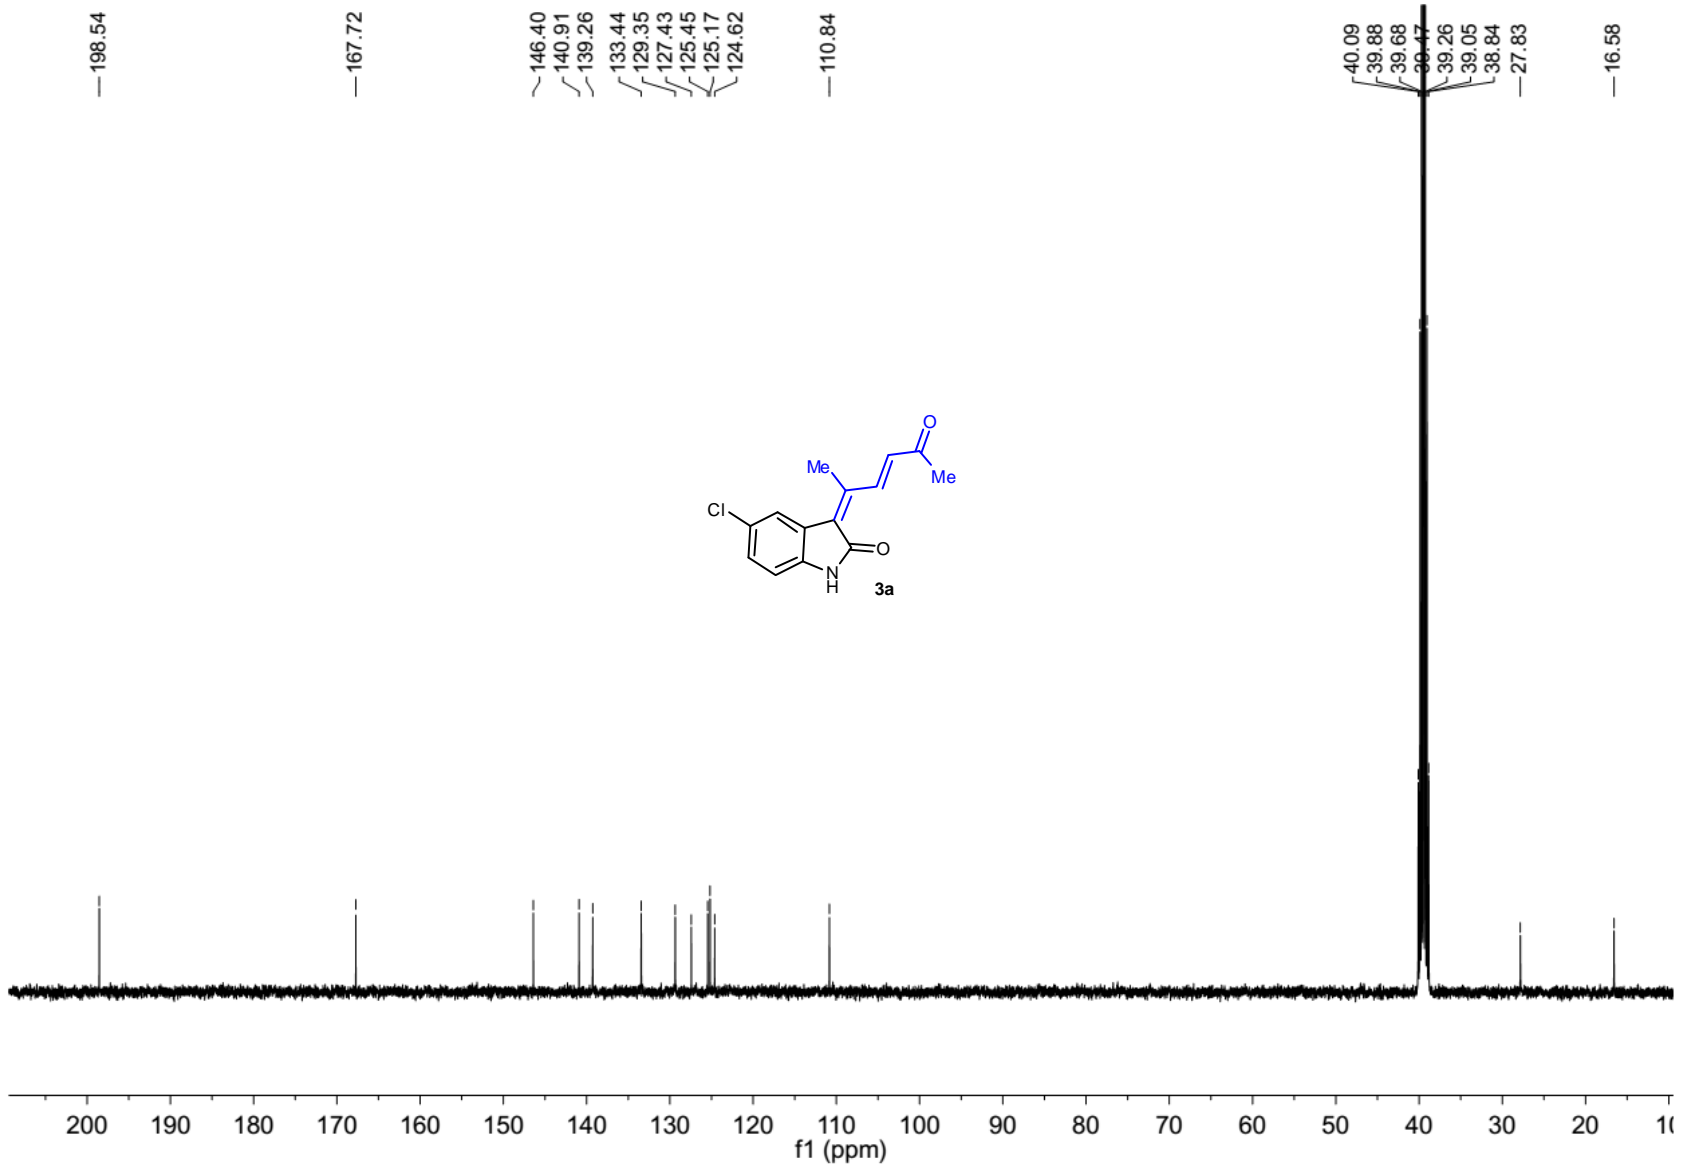

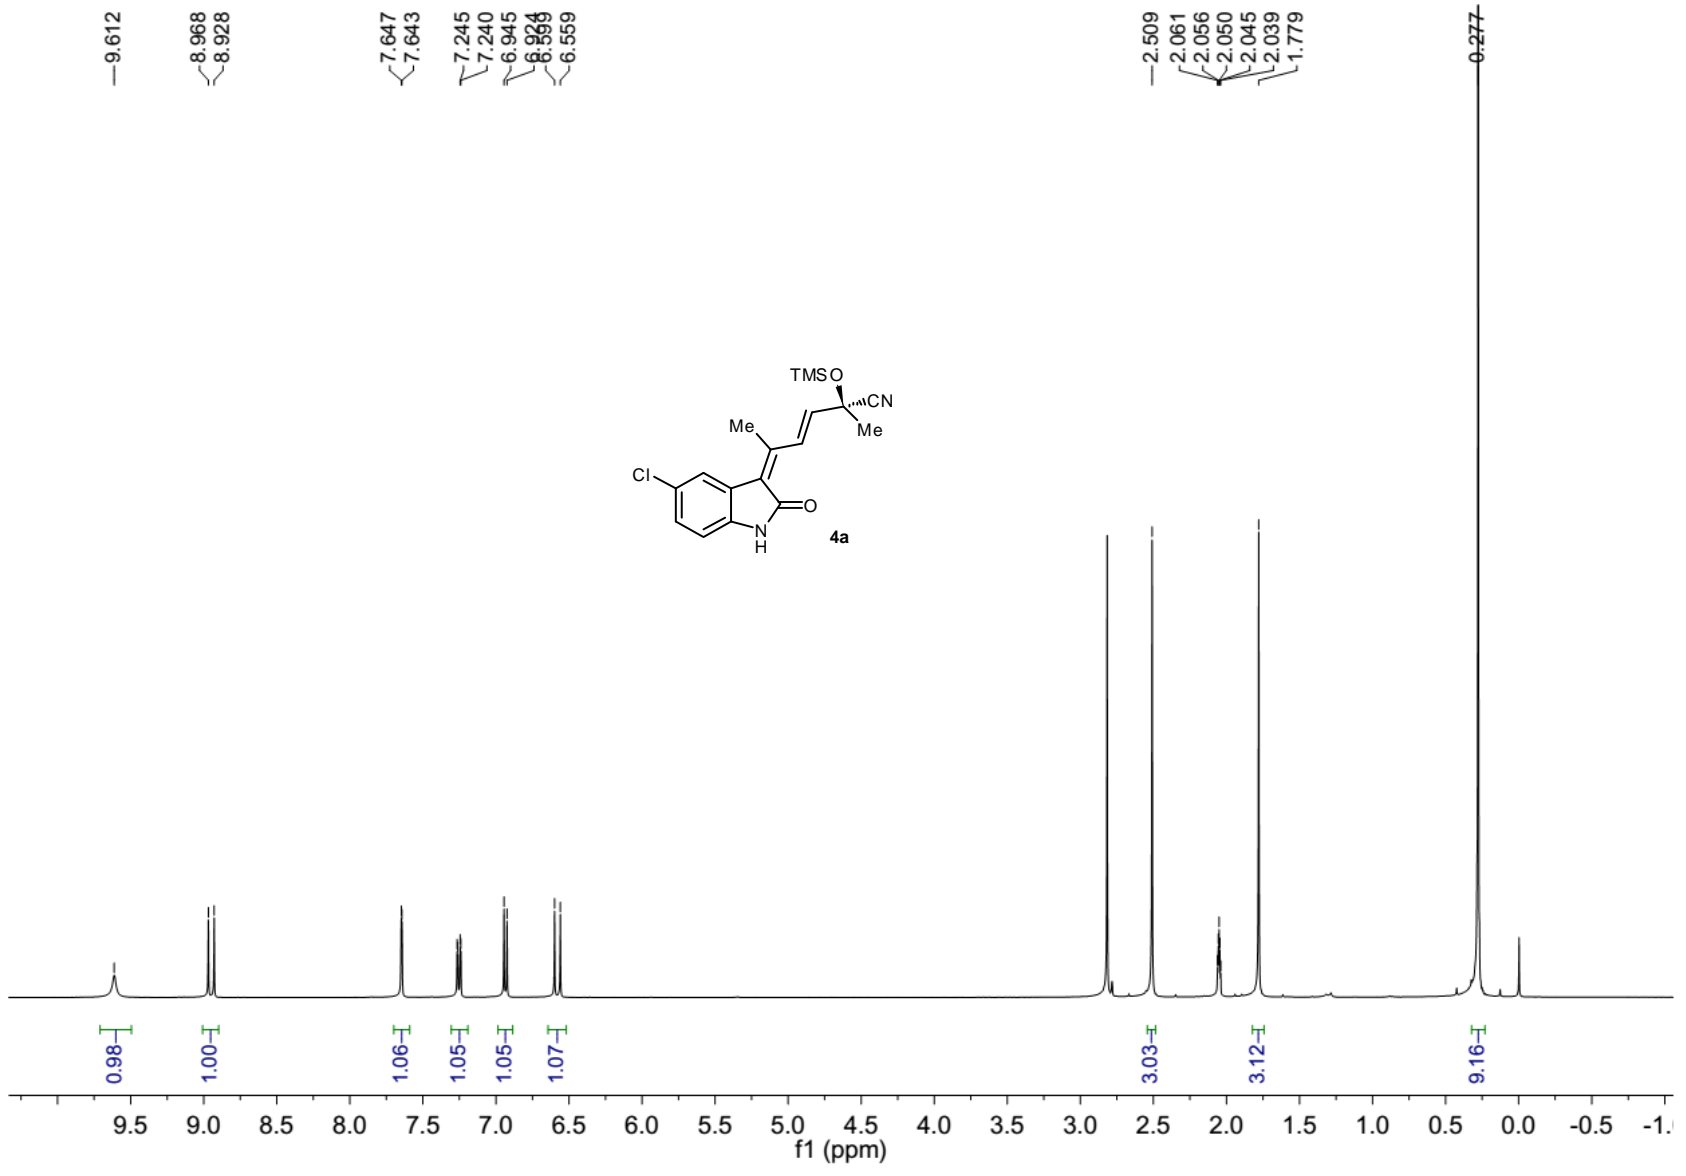

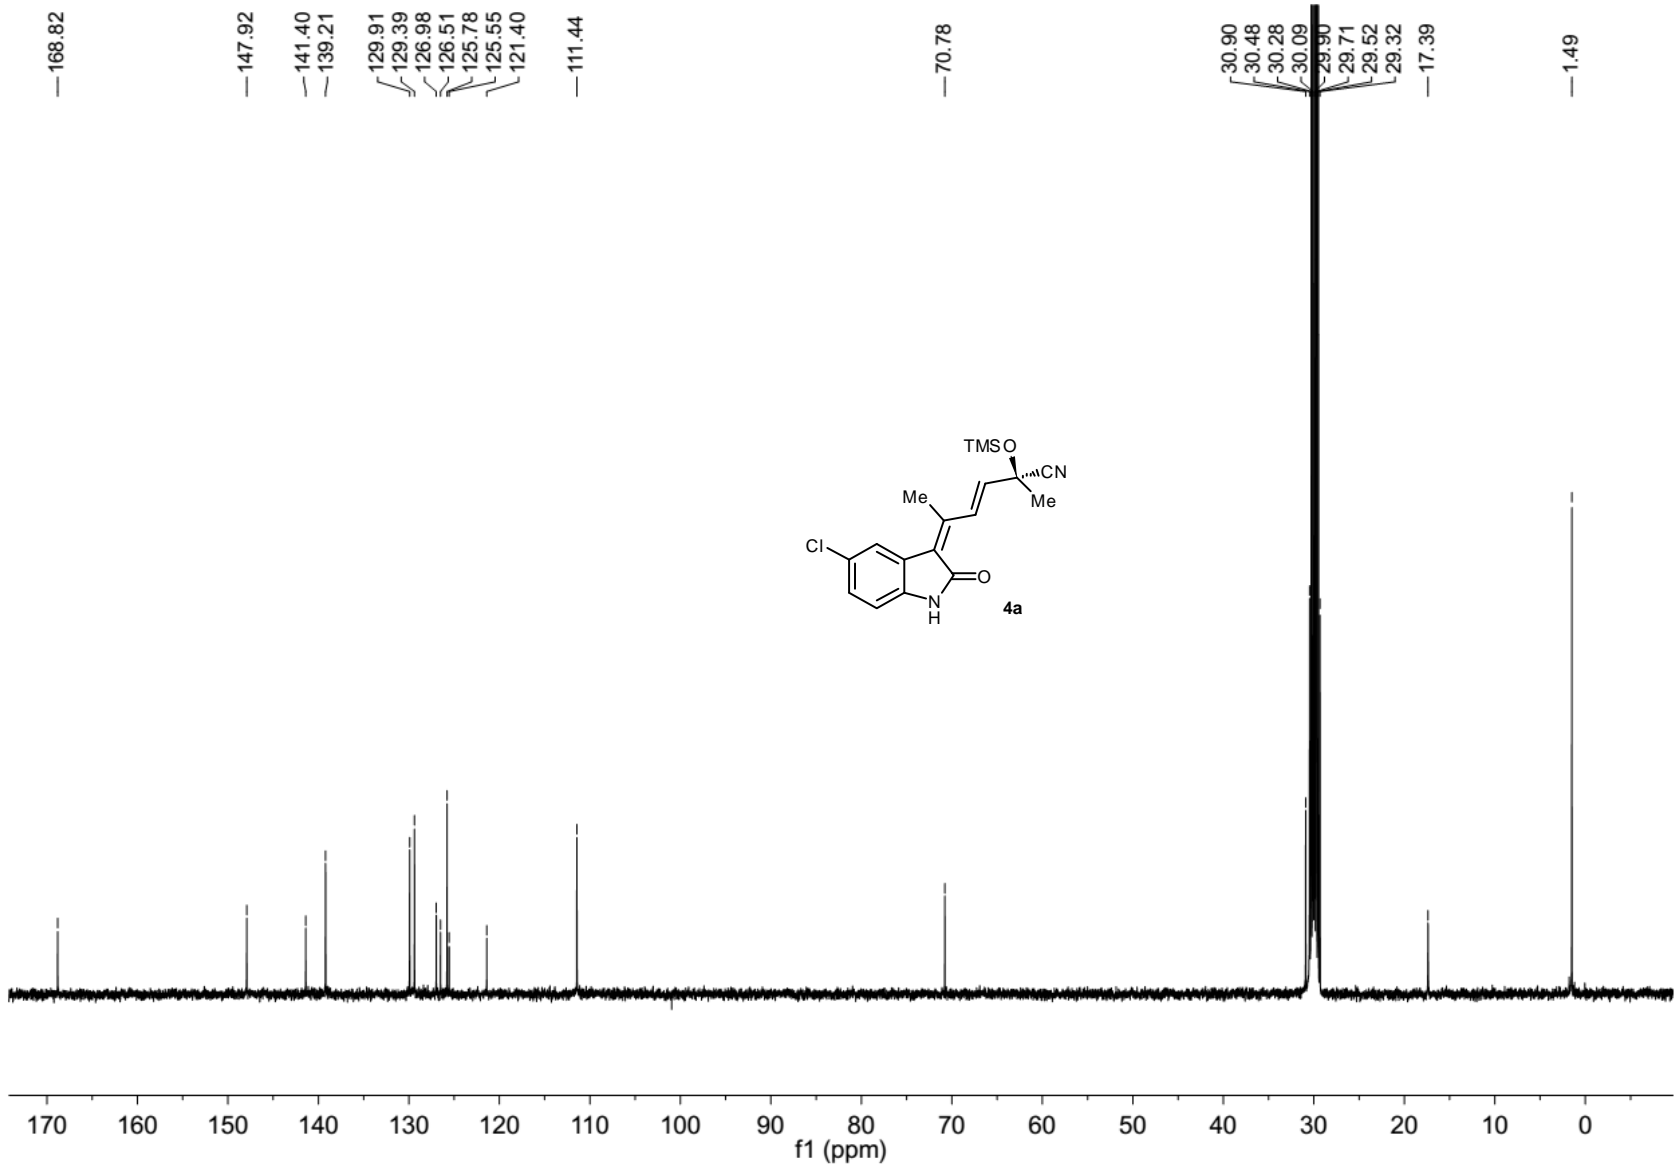



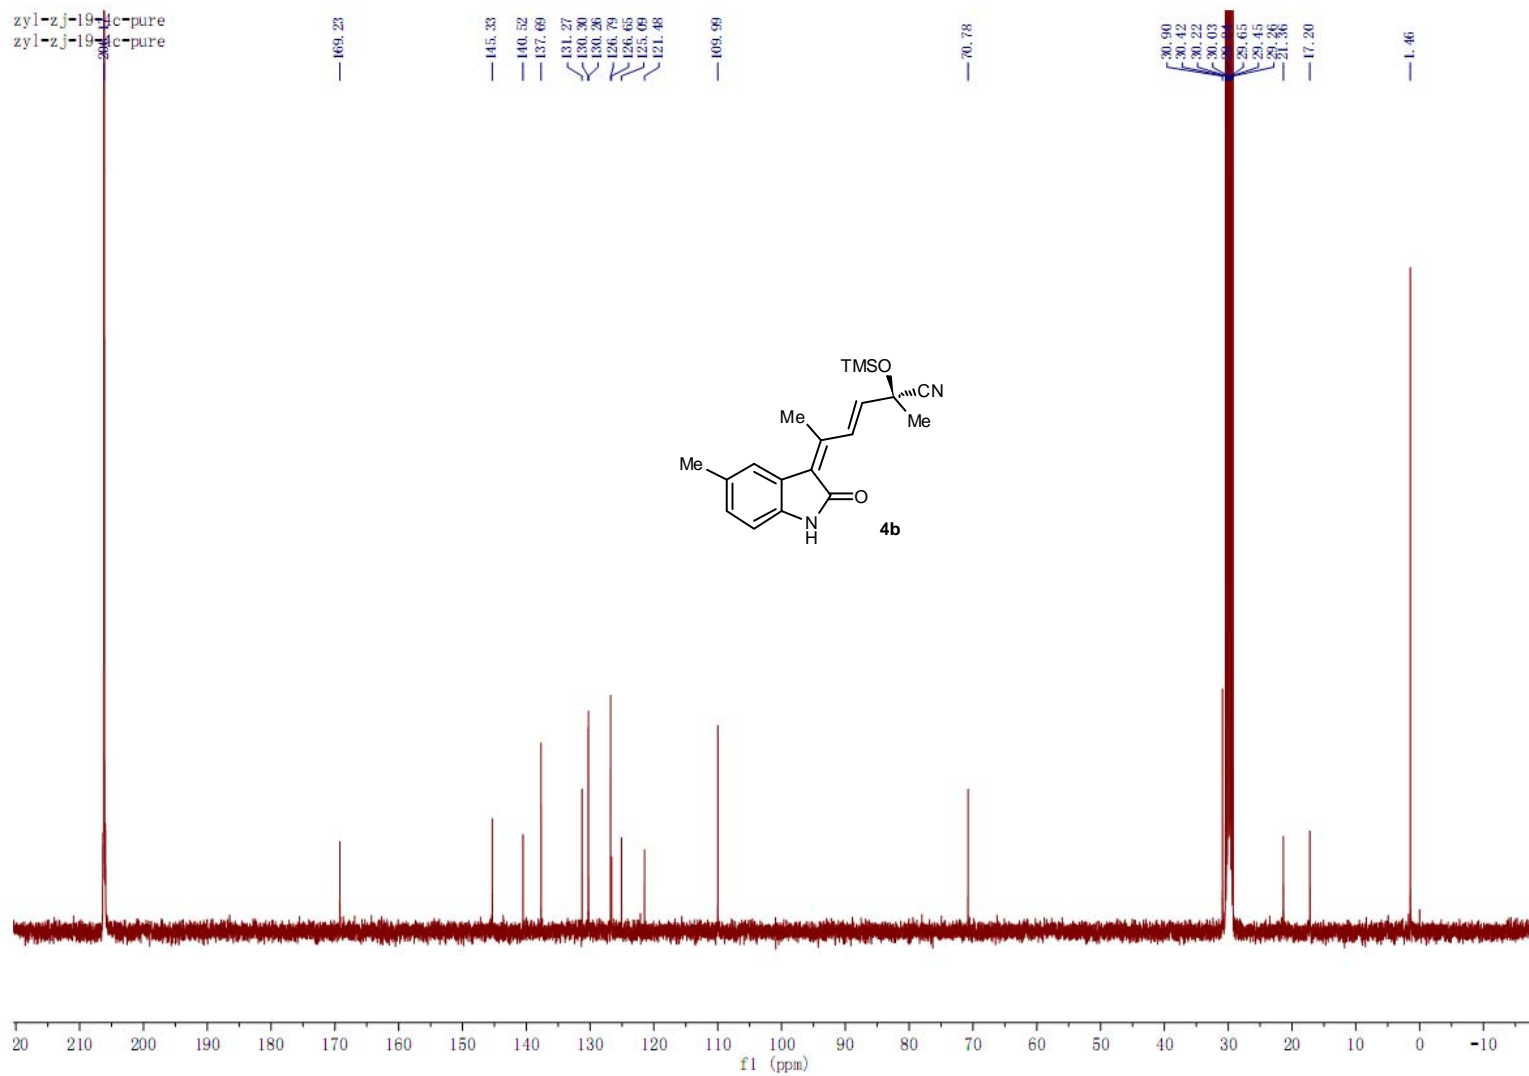

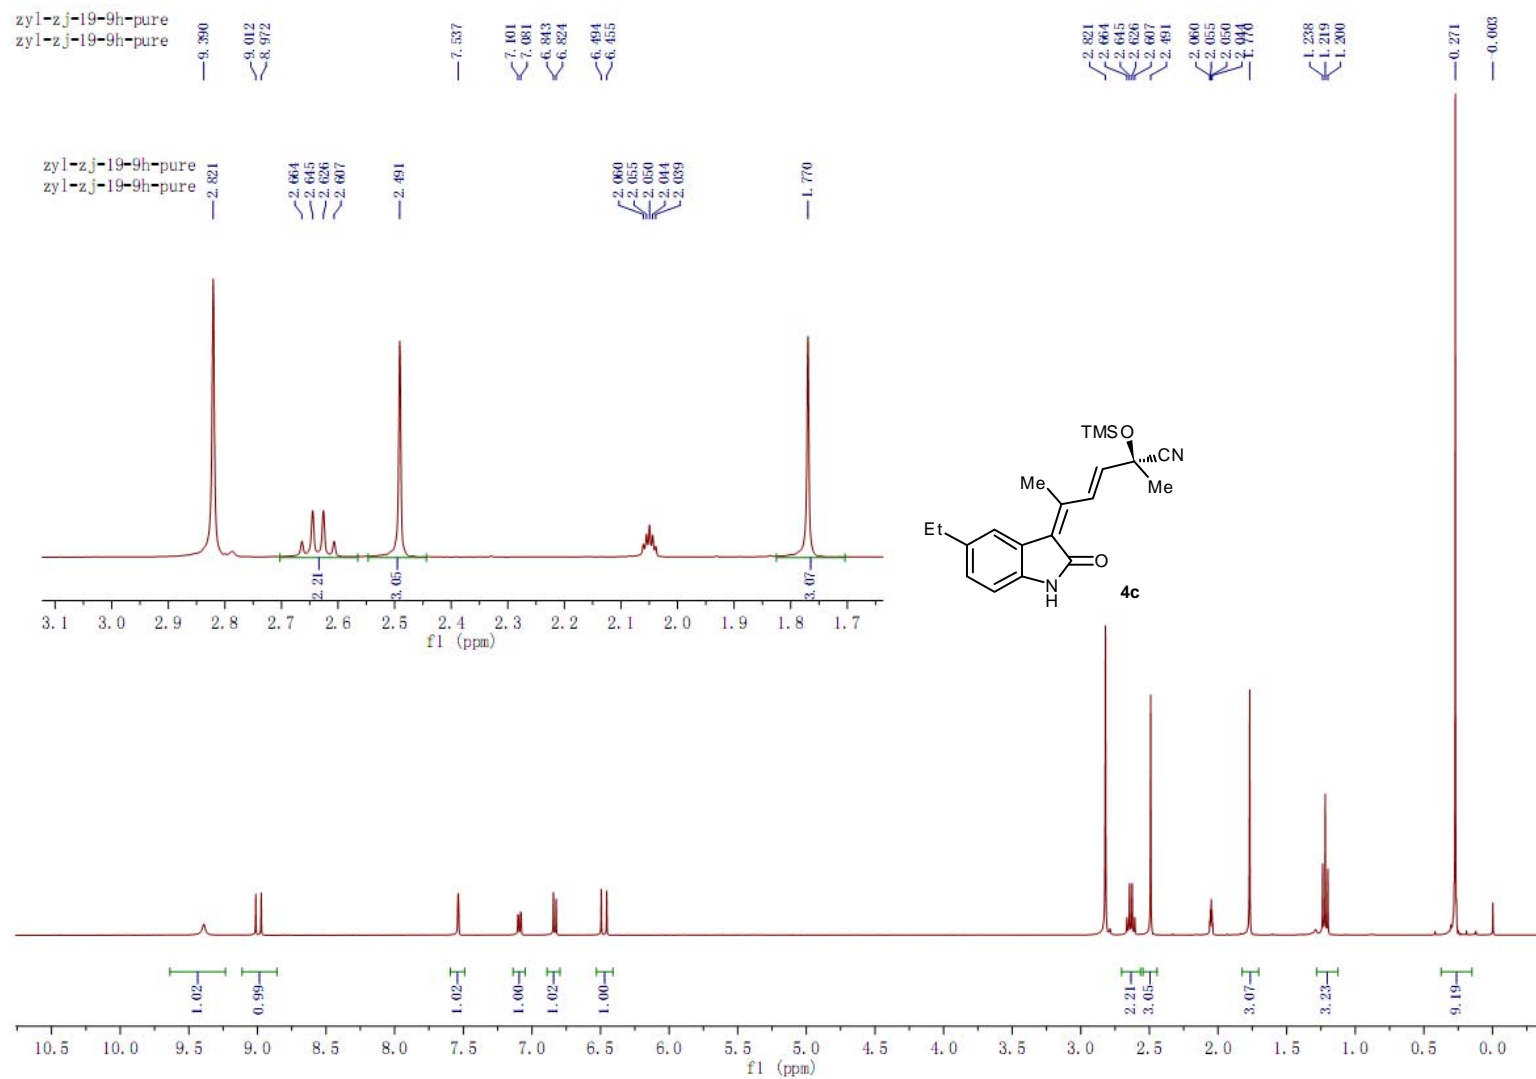

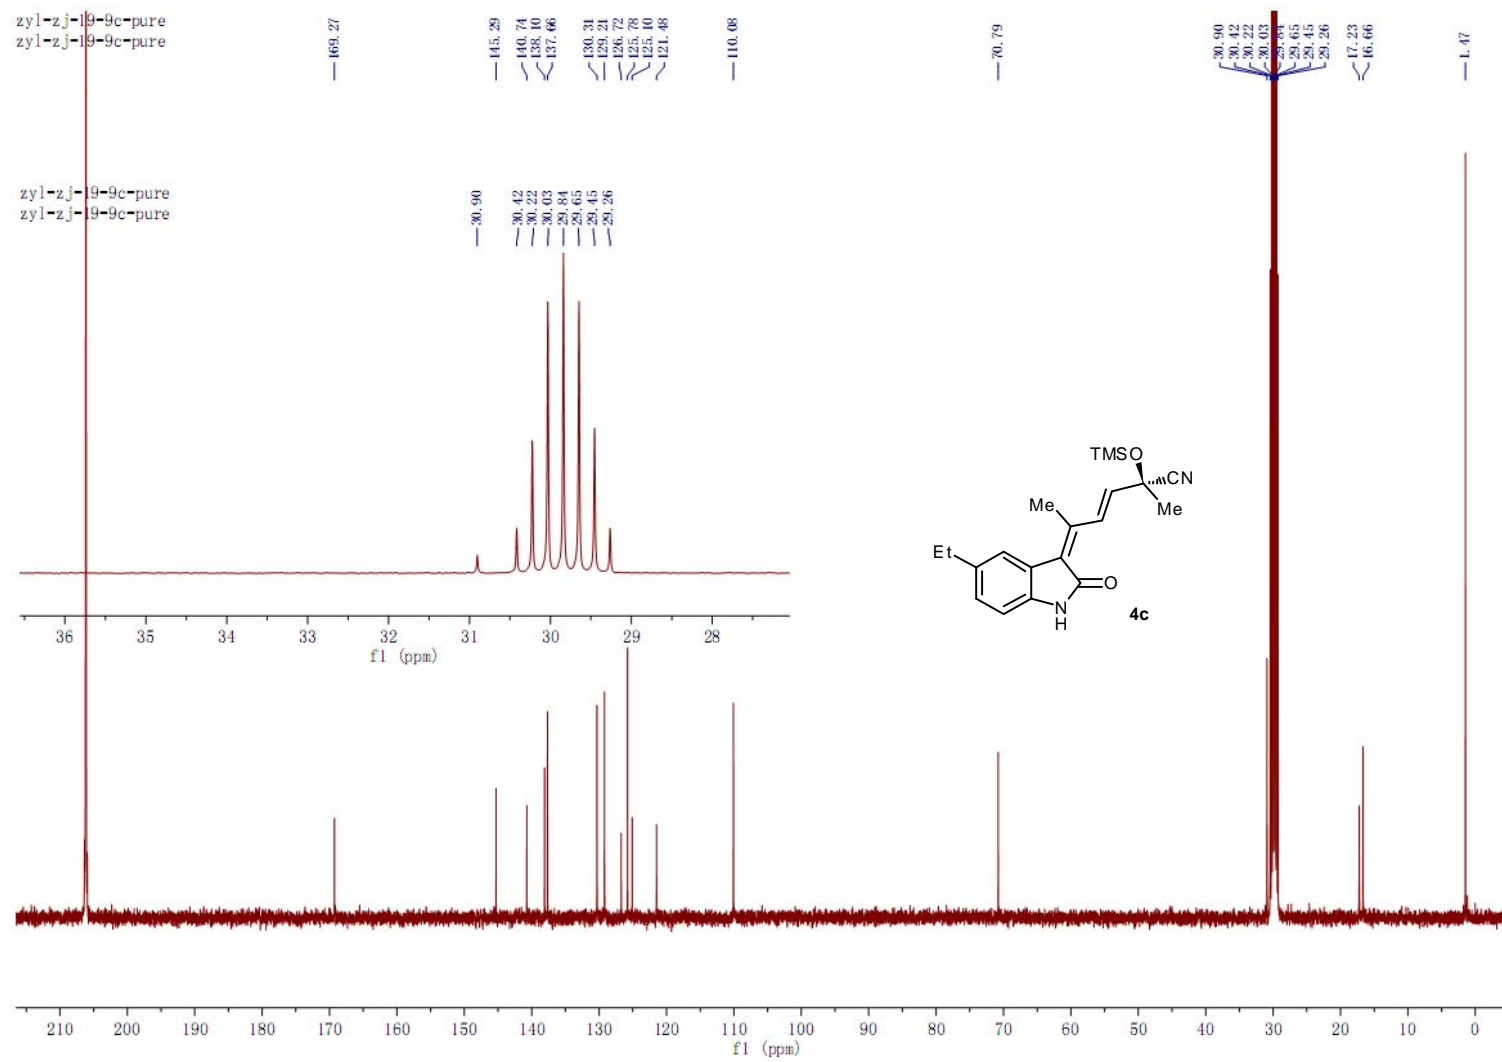

zyl-zj-19-3h-pure  
zyl-zj-19-3h-pure

9.472  
8.965  
8.926

7.778

7.408  
7.388

6.908  
6.887

6.601  
6.562

2.822

2.509

2.055  
2.050  
2.045

1.778

0.276  
0.003

zyl-zj-19-3h-pure  
zyl-zj-19-3h-pure

7.408  
7.388

6.908  
6.887

6.601  
6.562

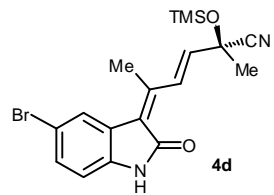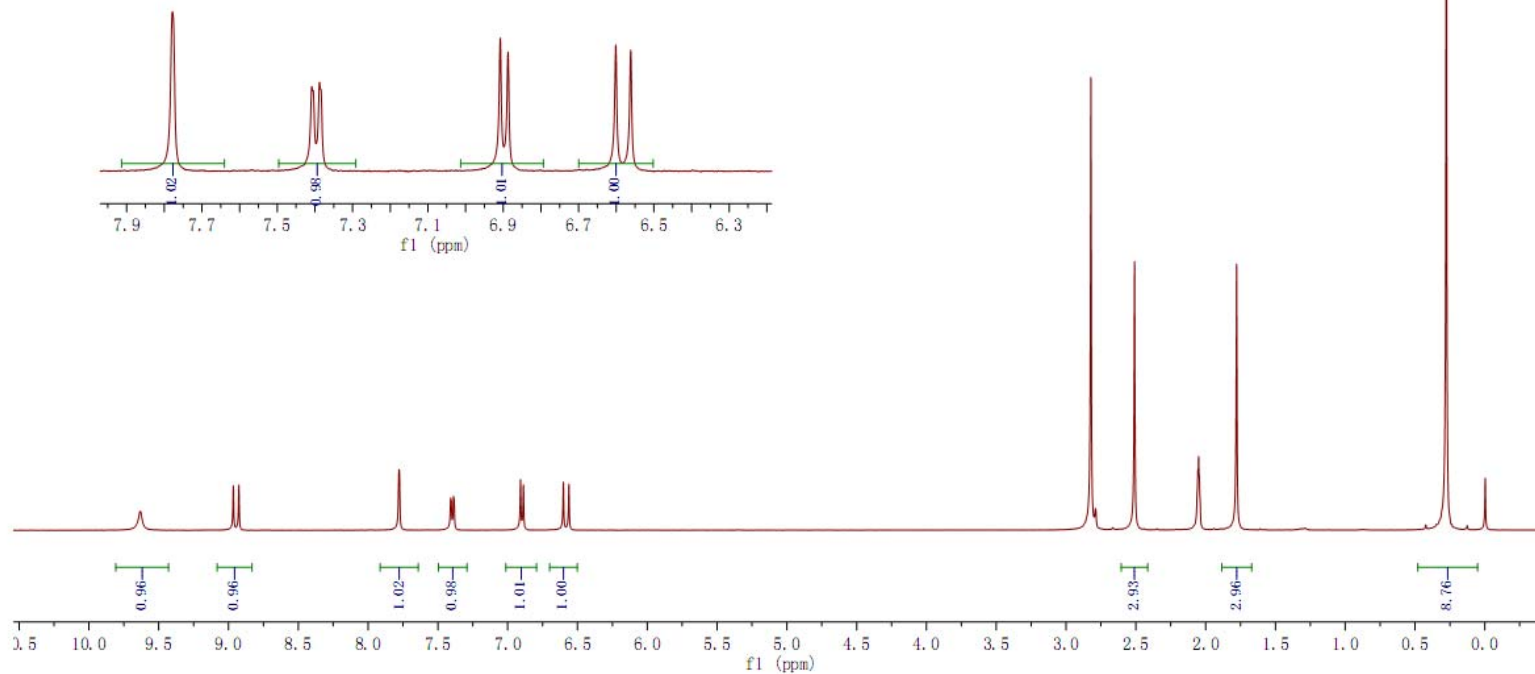



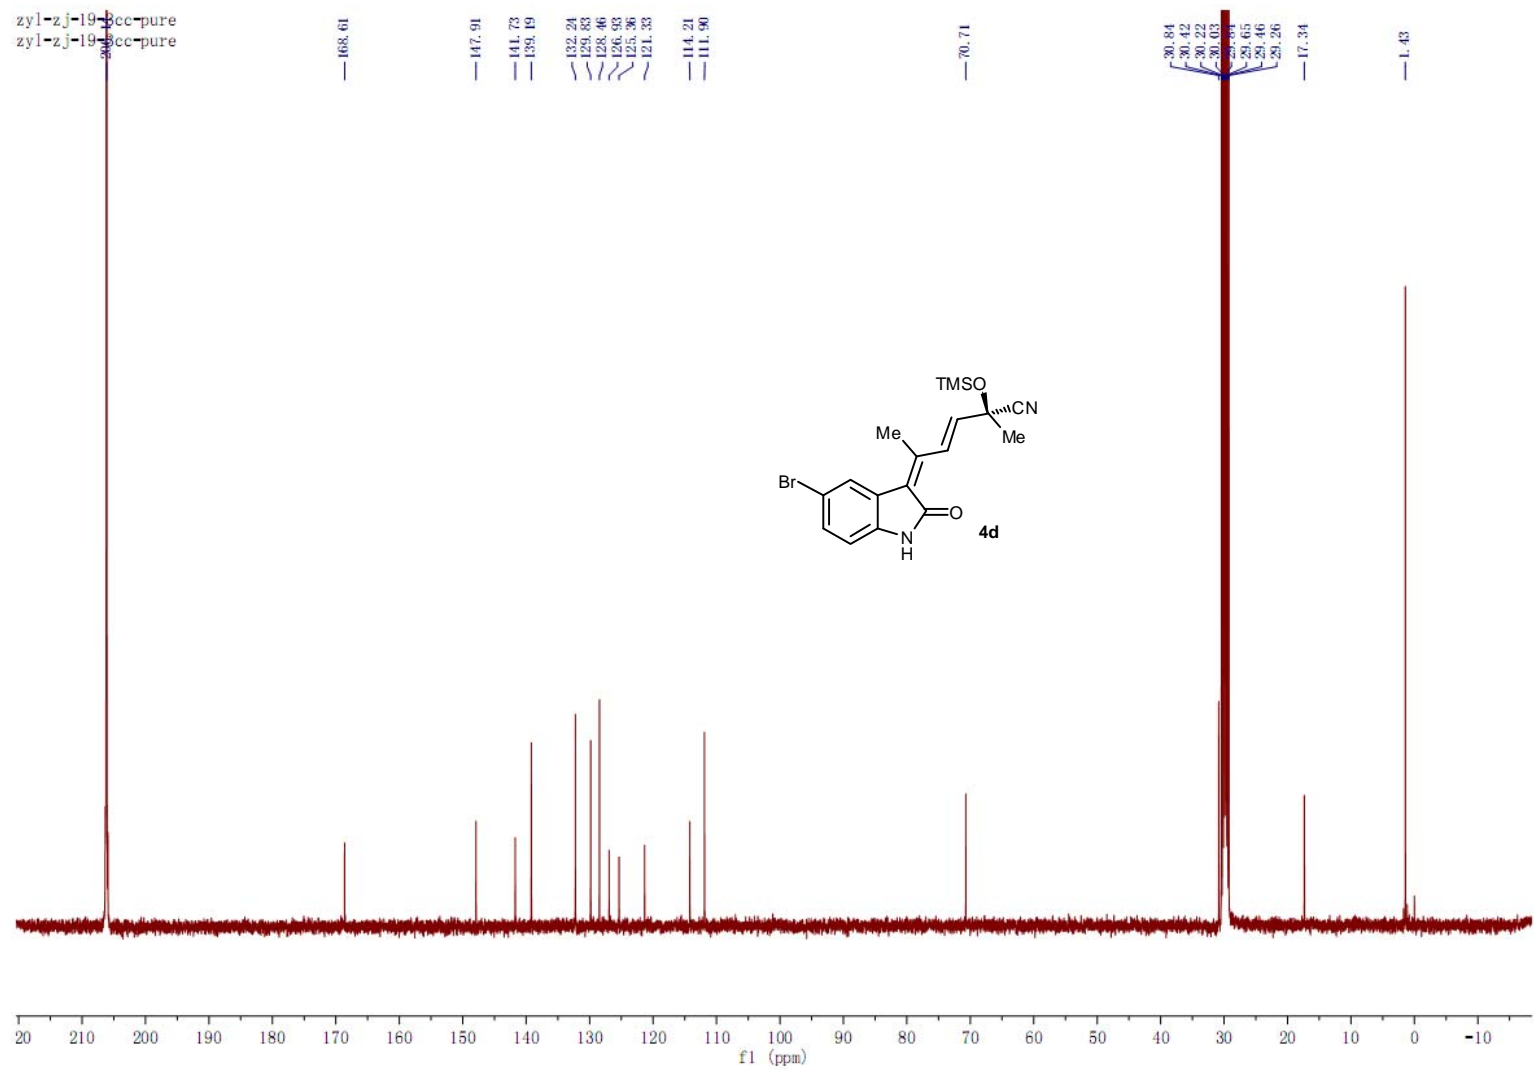

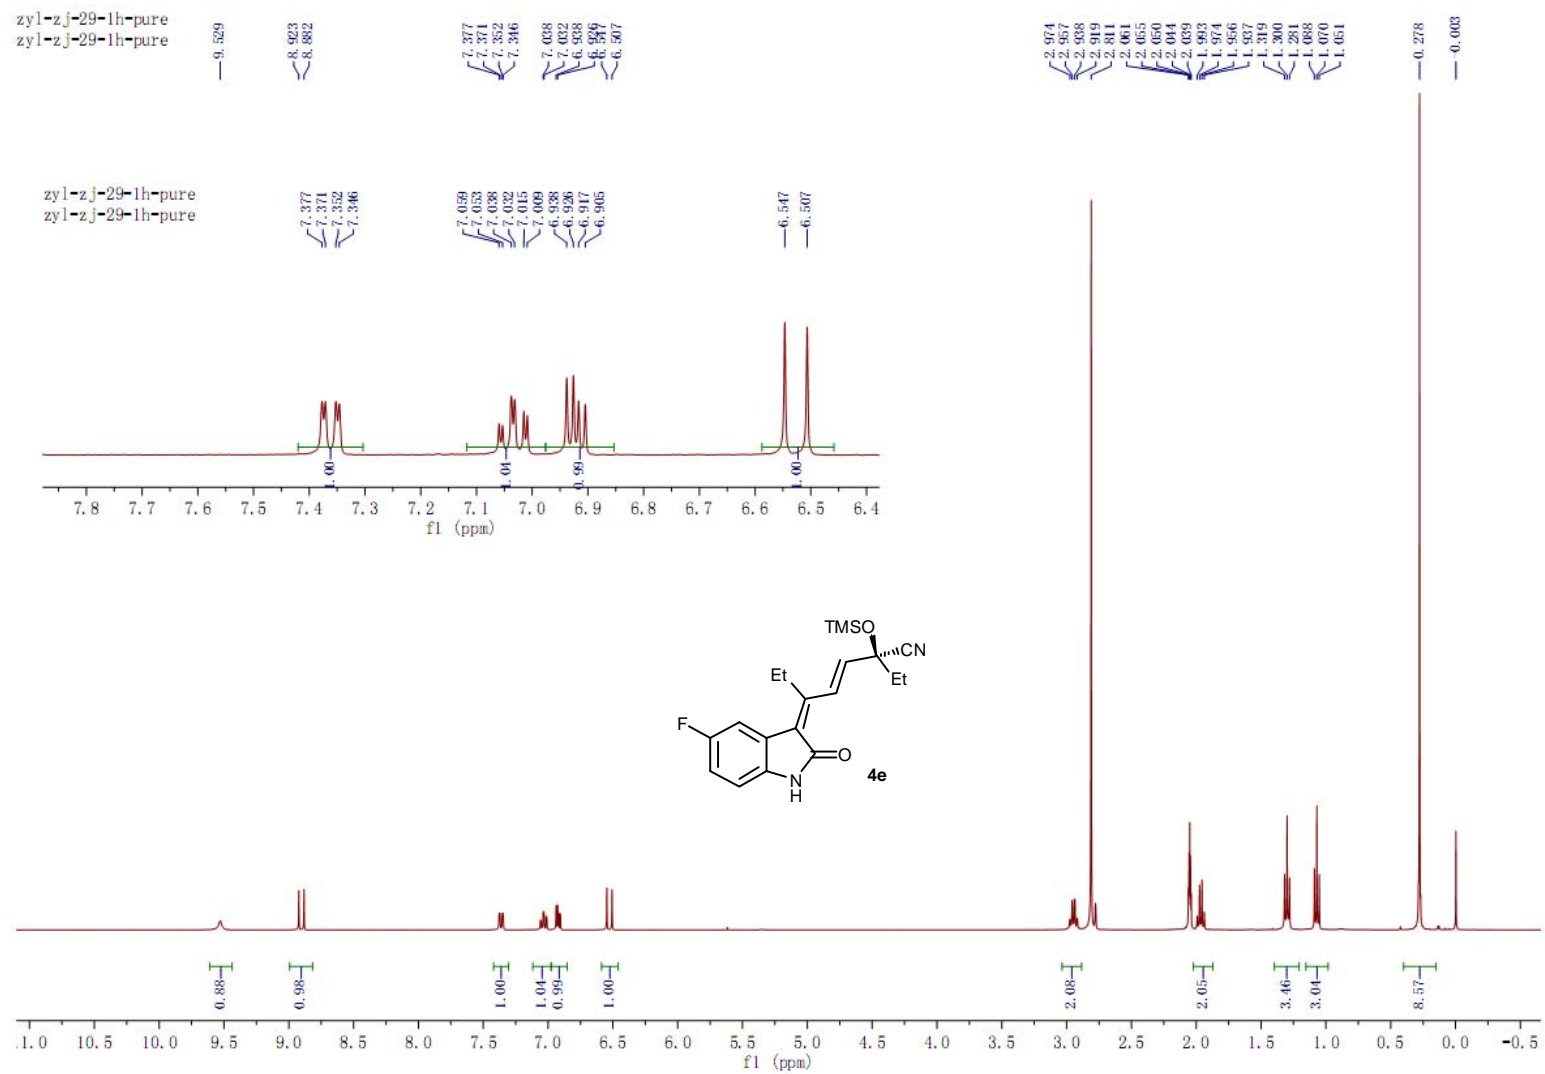

zyl-zj-29-1fff  
zyl-zj-29-1fff

123.18

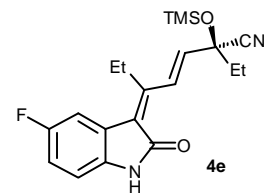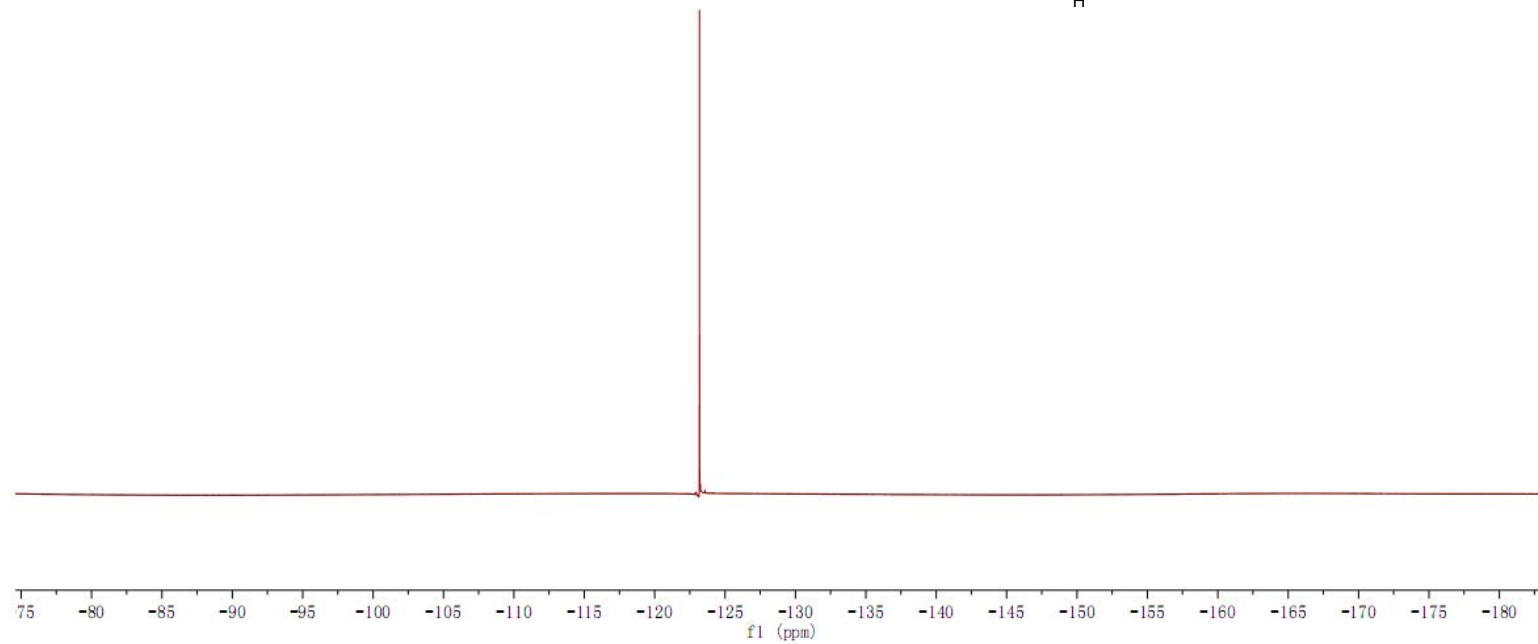



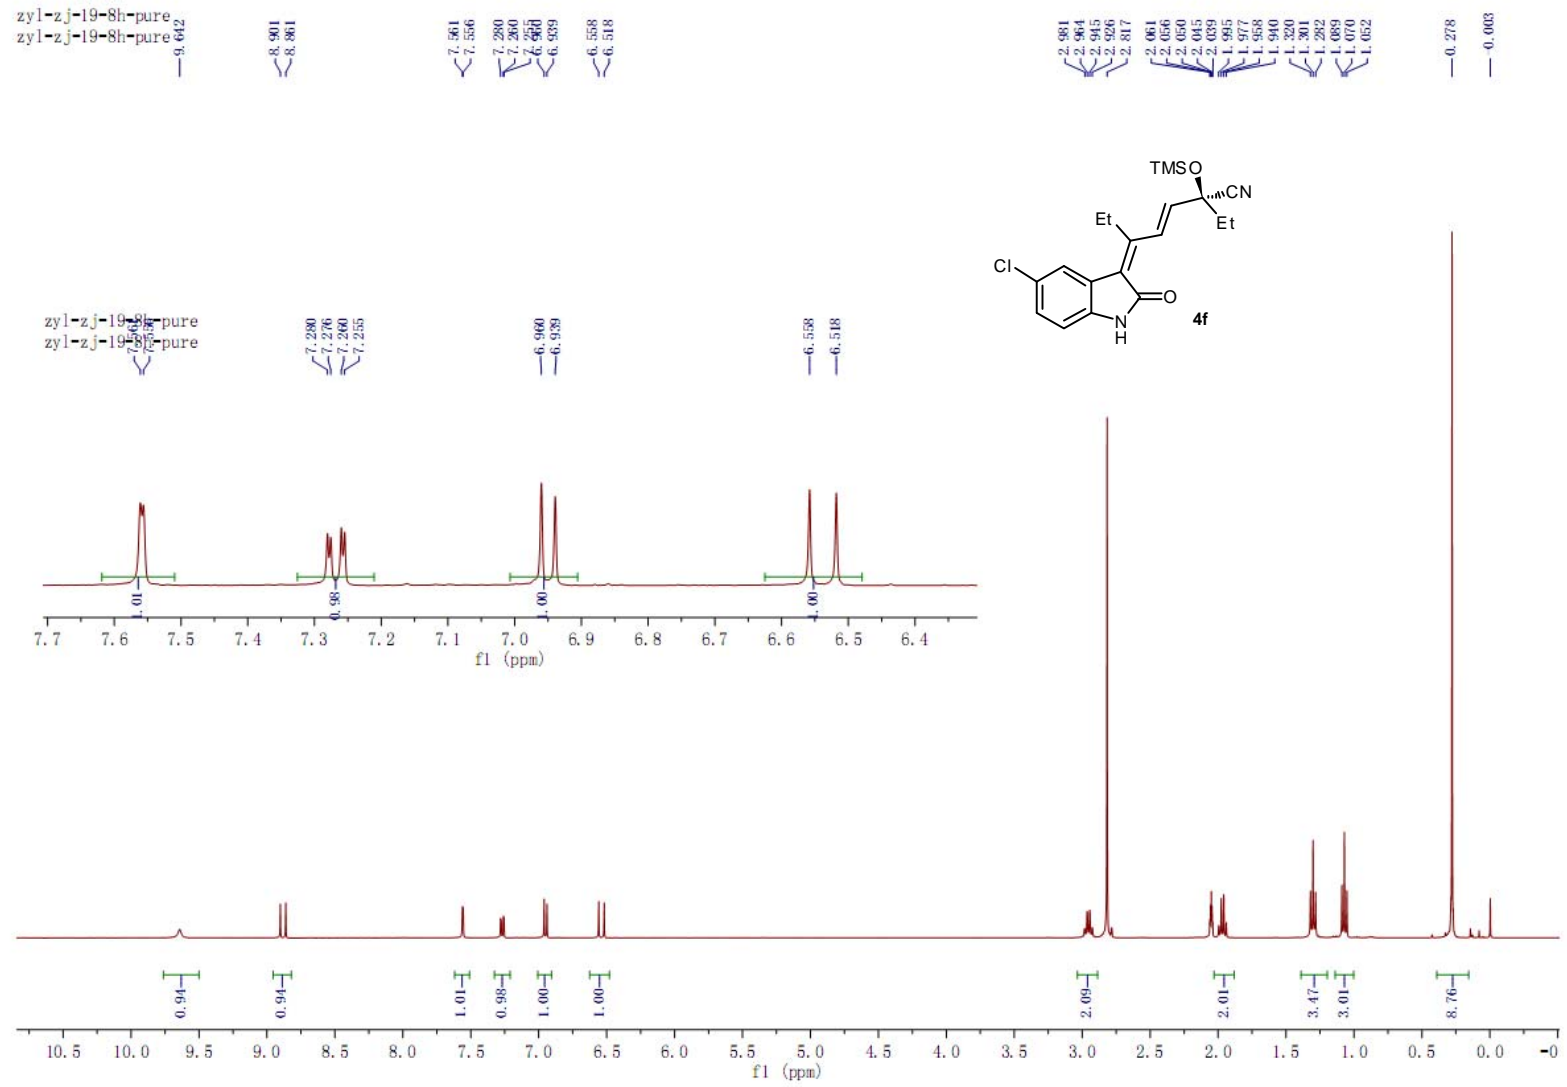

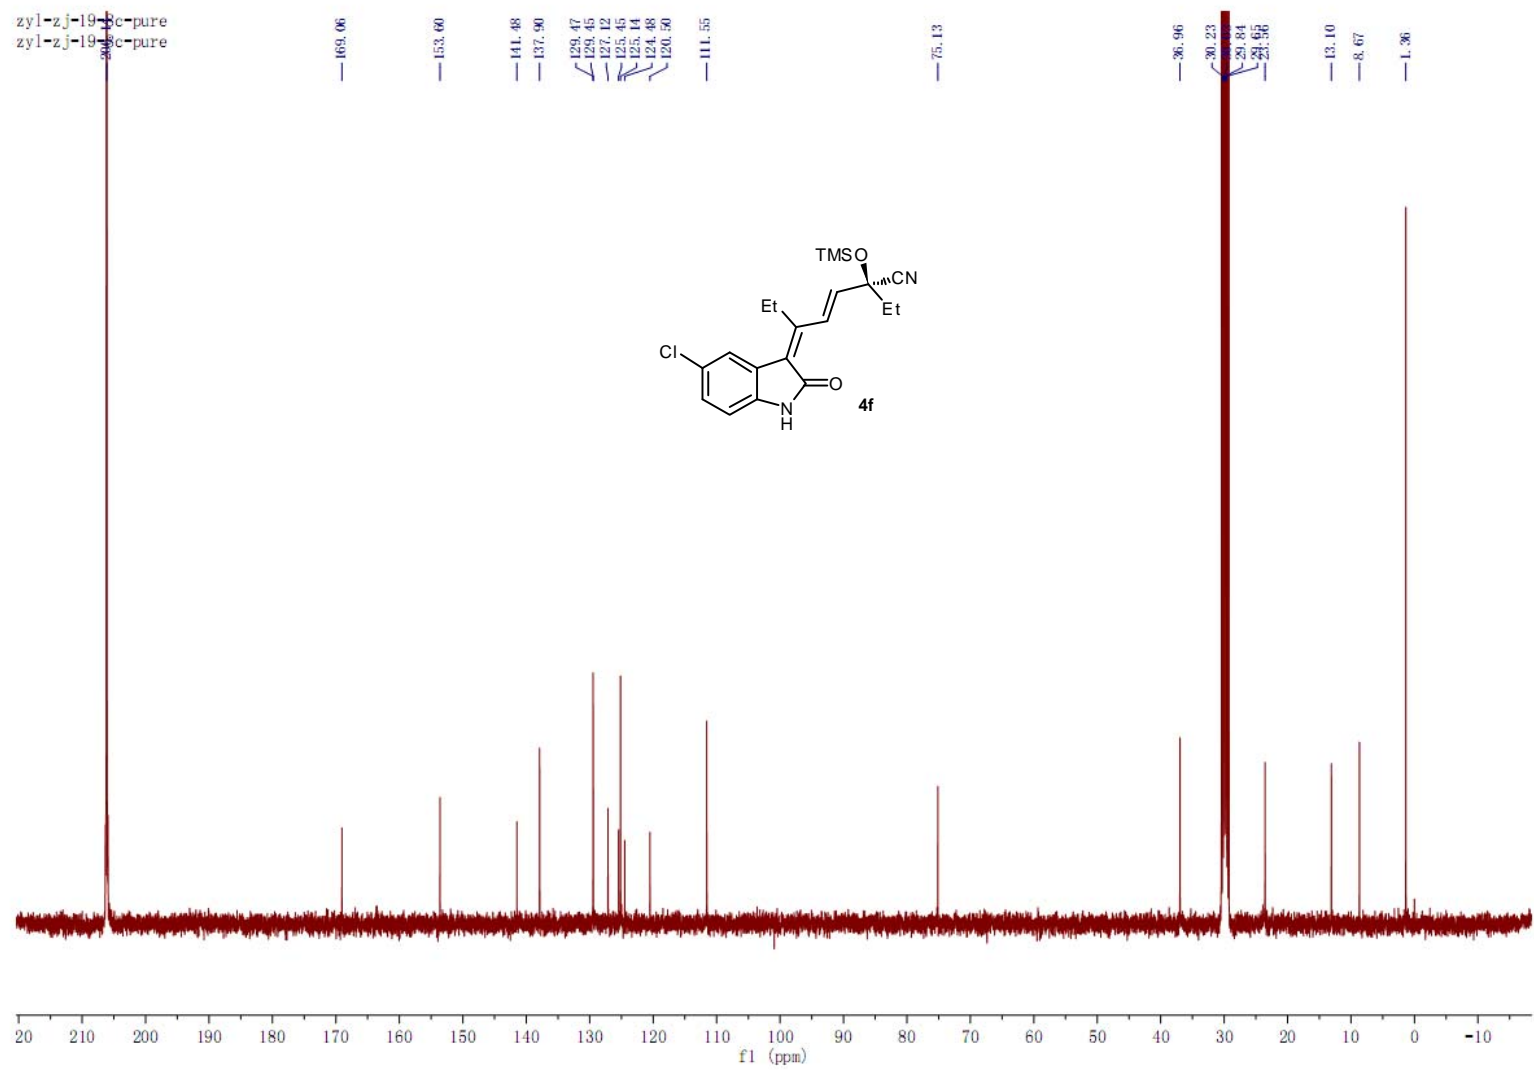

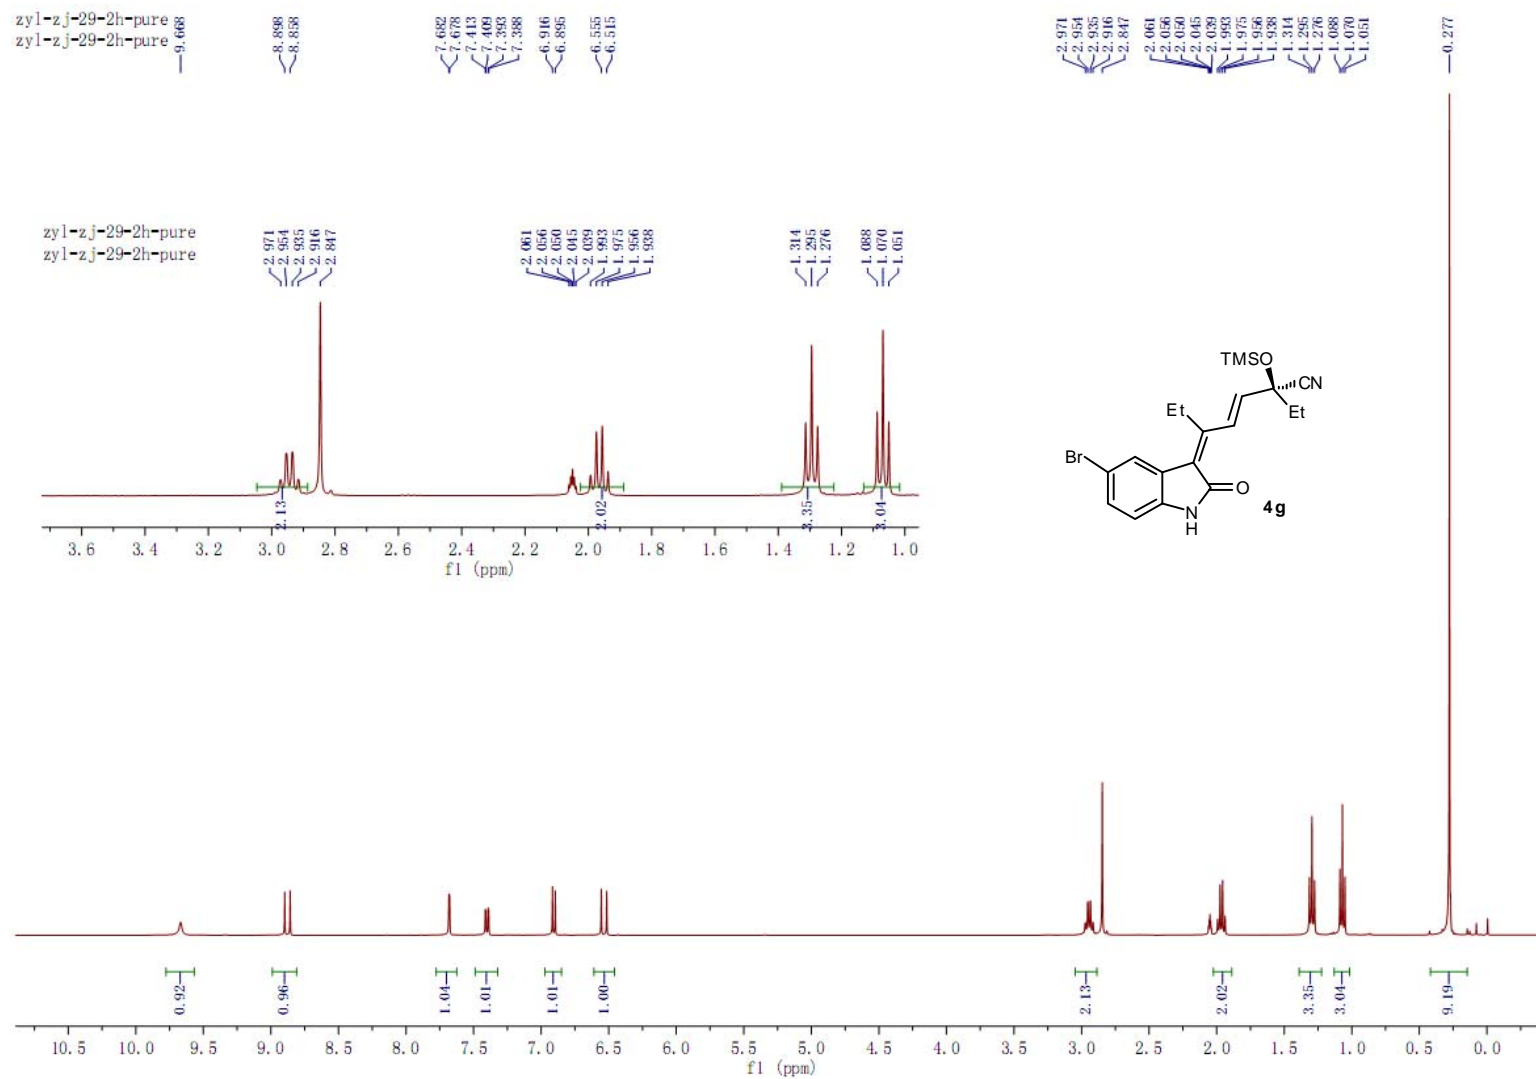

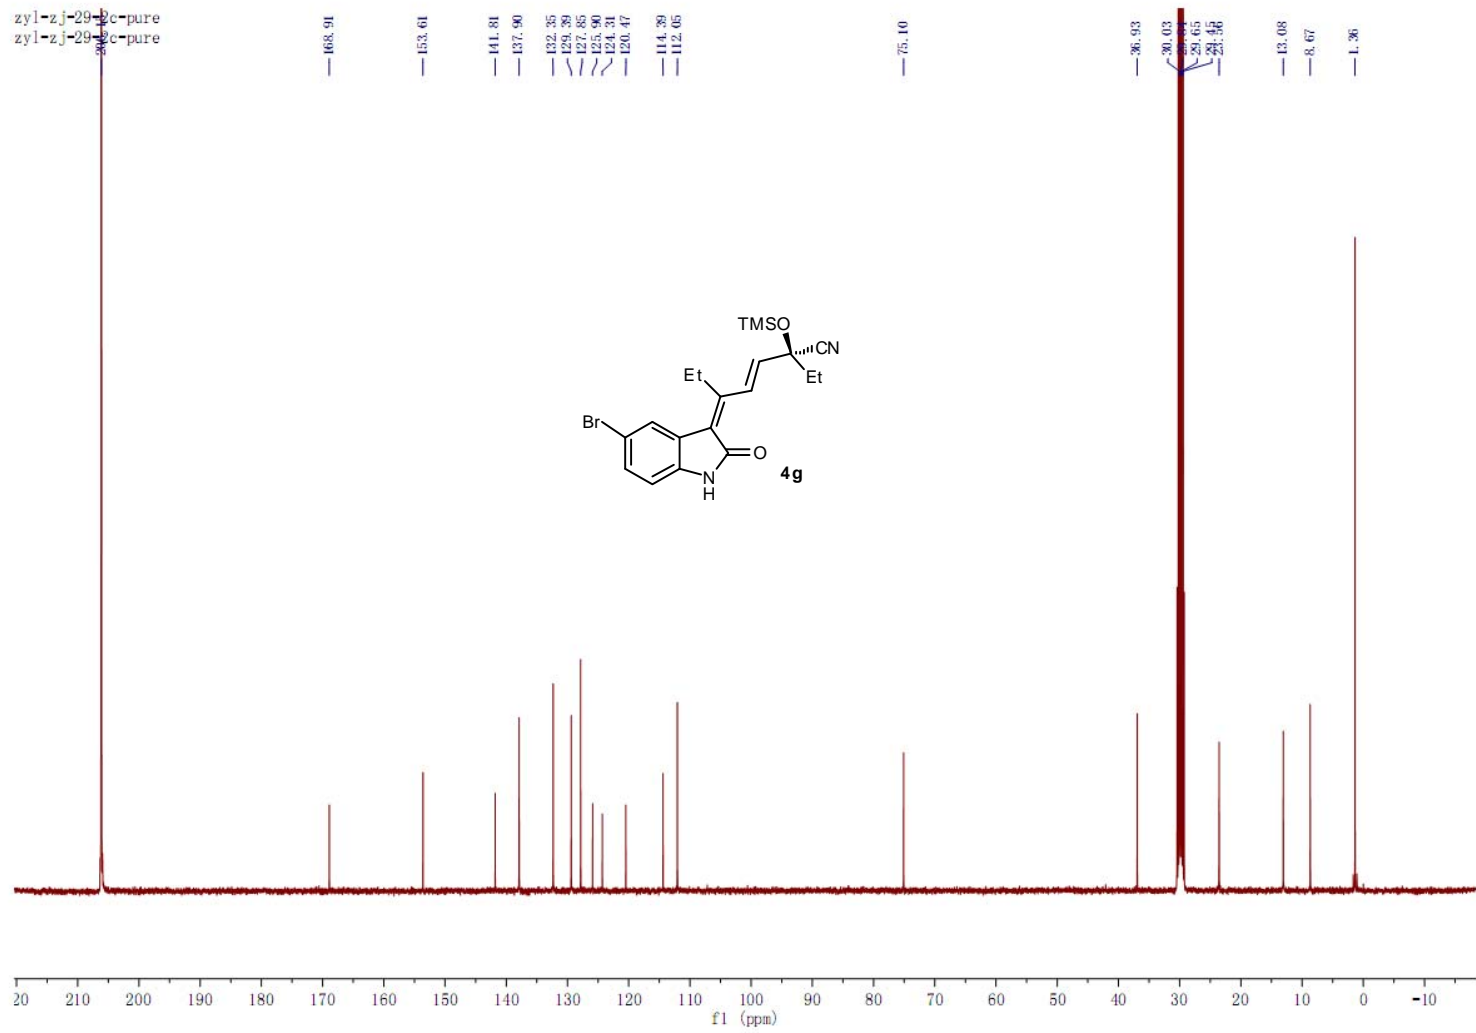



zyl-zj-75-1h-pure  
zyl-zj-75-1h-pure

9.008  
8.969

7.796  
7.792  
7.492  
7.487  
7.471  
7.466

6.956  
6.955  
6.614  
6.574

3.215

2.812

2.519

2.061  
2.055  
2.050  
2.044  
2.039  
1.785

0.284

0.003

zyl-zj-75-1h-pure  
zyl-zj-75-1h-pure  
zyl-zj-75-1h-pure

7.796  
7.792  
7.492  
7.487  
7.471  
7.466

6.956  
6.955

6.614  
6.574

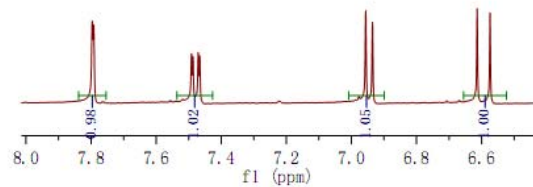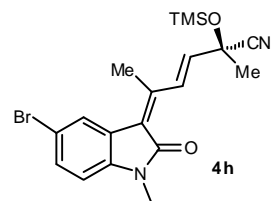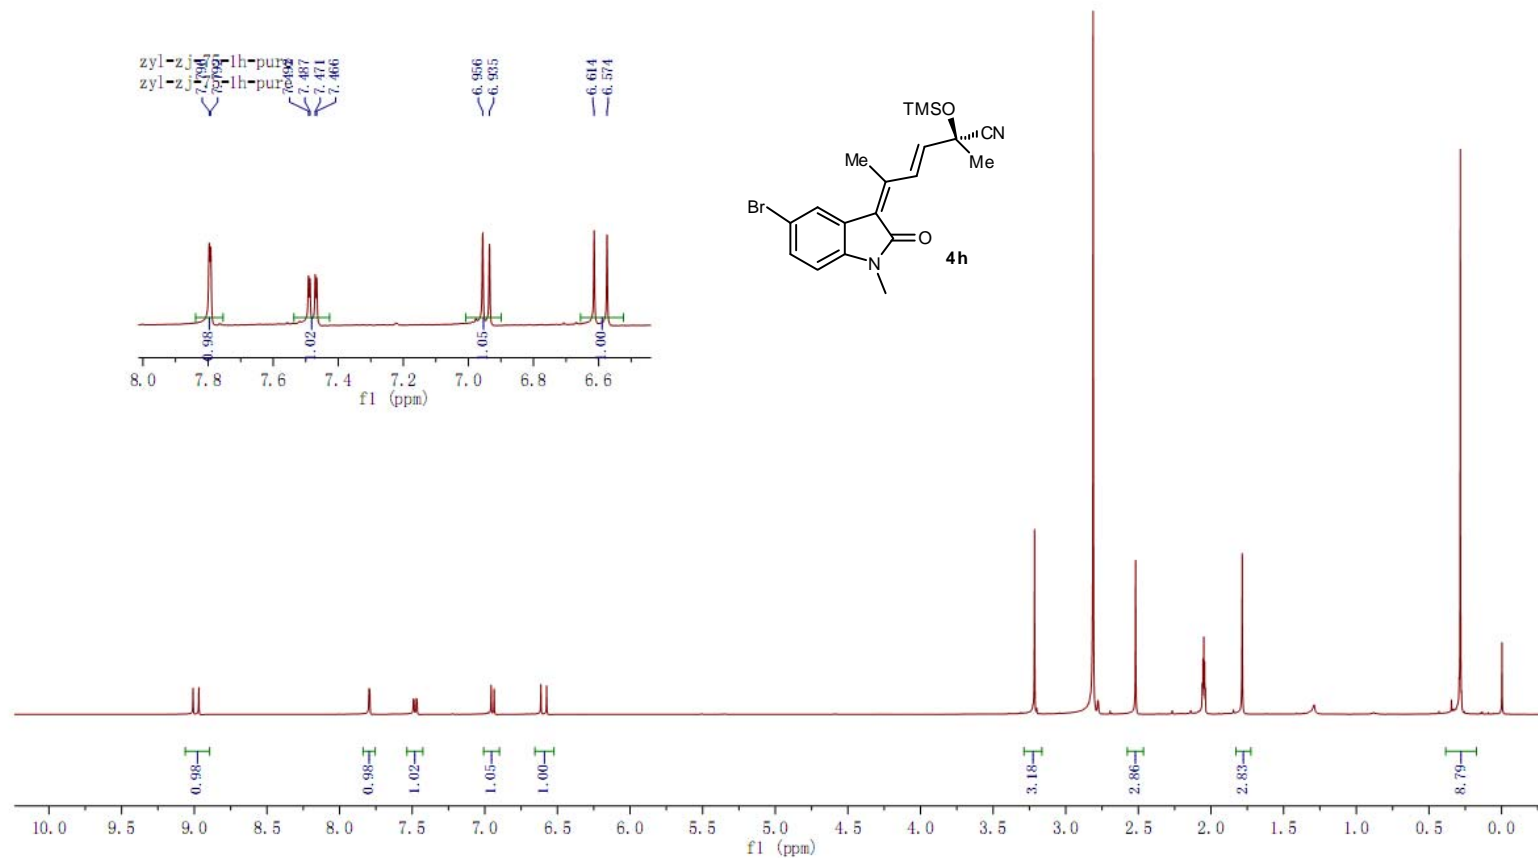

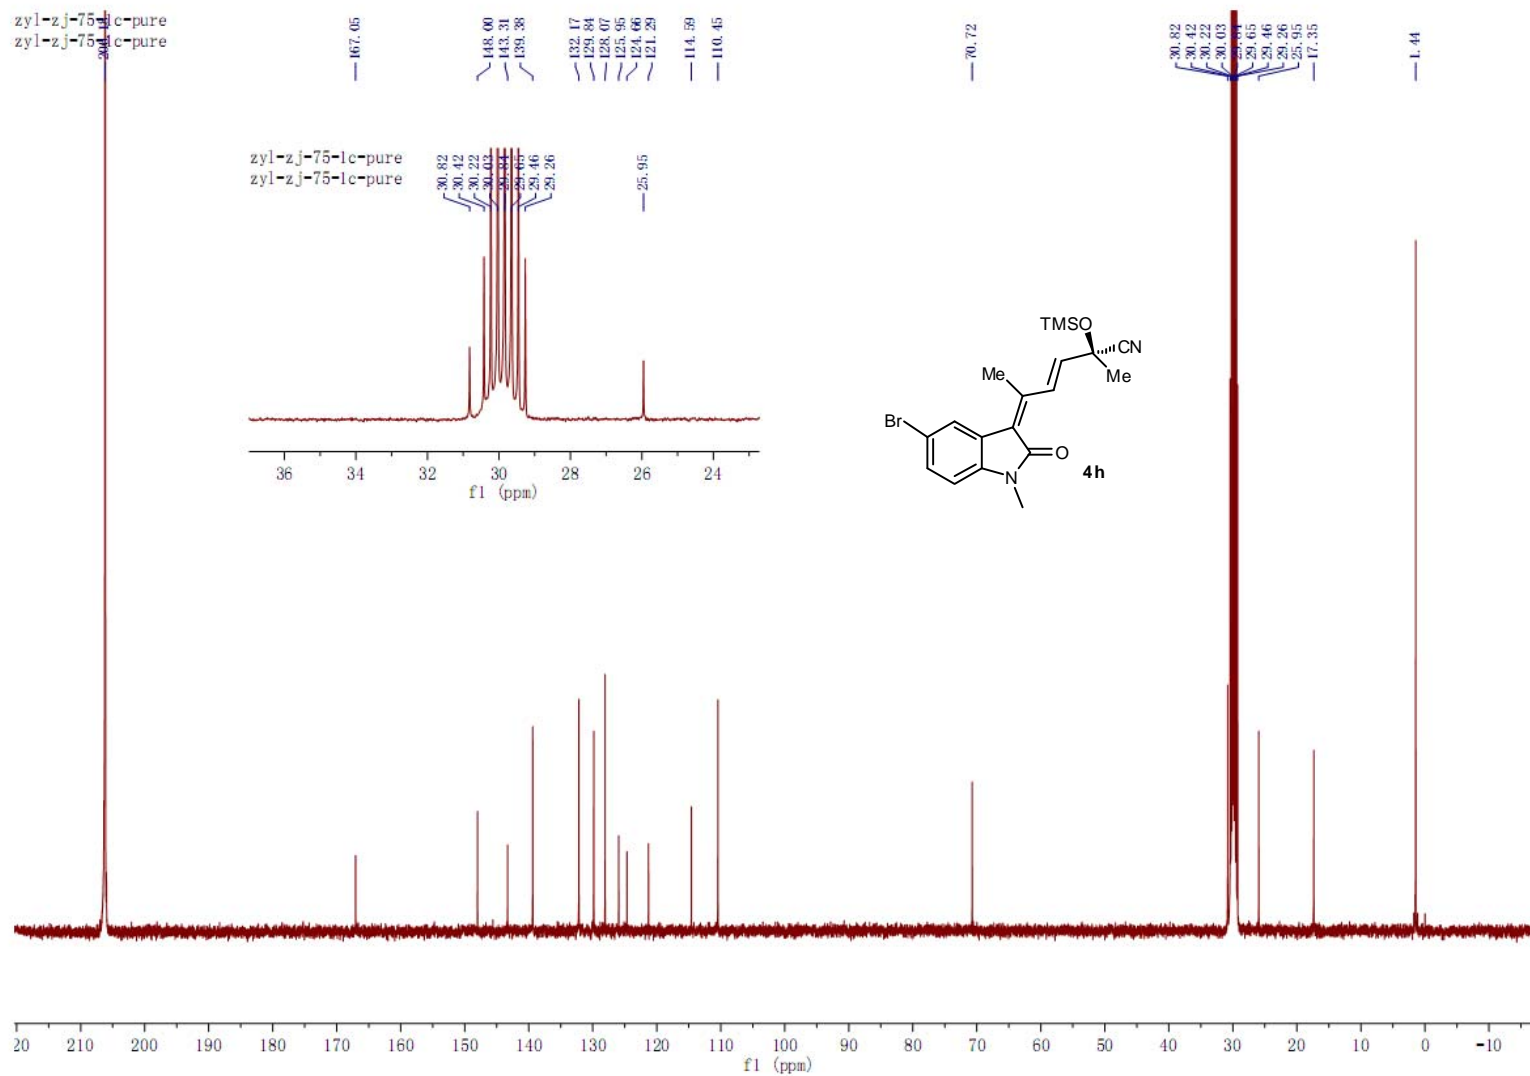

zyl-zj-79-1h  
zyl-zj-79-1h

9.012  
8.972

7.662  
7.658  
7.349  
7.344  
7.328  
7.323  
6.993  
6.973  
6.620  
6.581

3.214

2.868

2.515

2.061  
2.056  
2.050  
2.045  
2.039  
1.784

0.282

0.006

zyl-zj-79-1h  
zyl-zj-79-1h

7.349  
7.344  
7.328  
7.323

6.993  
6.973

6.620  
6.581

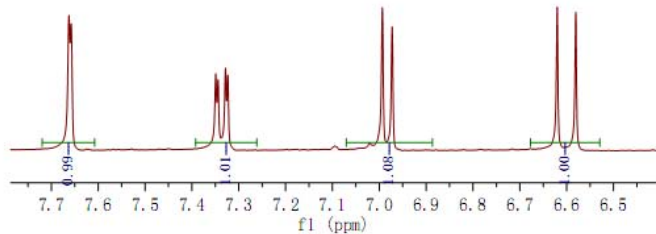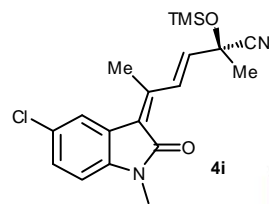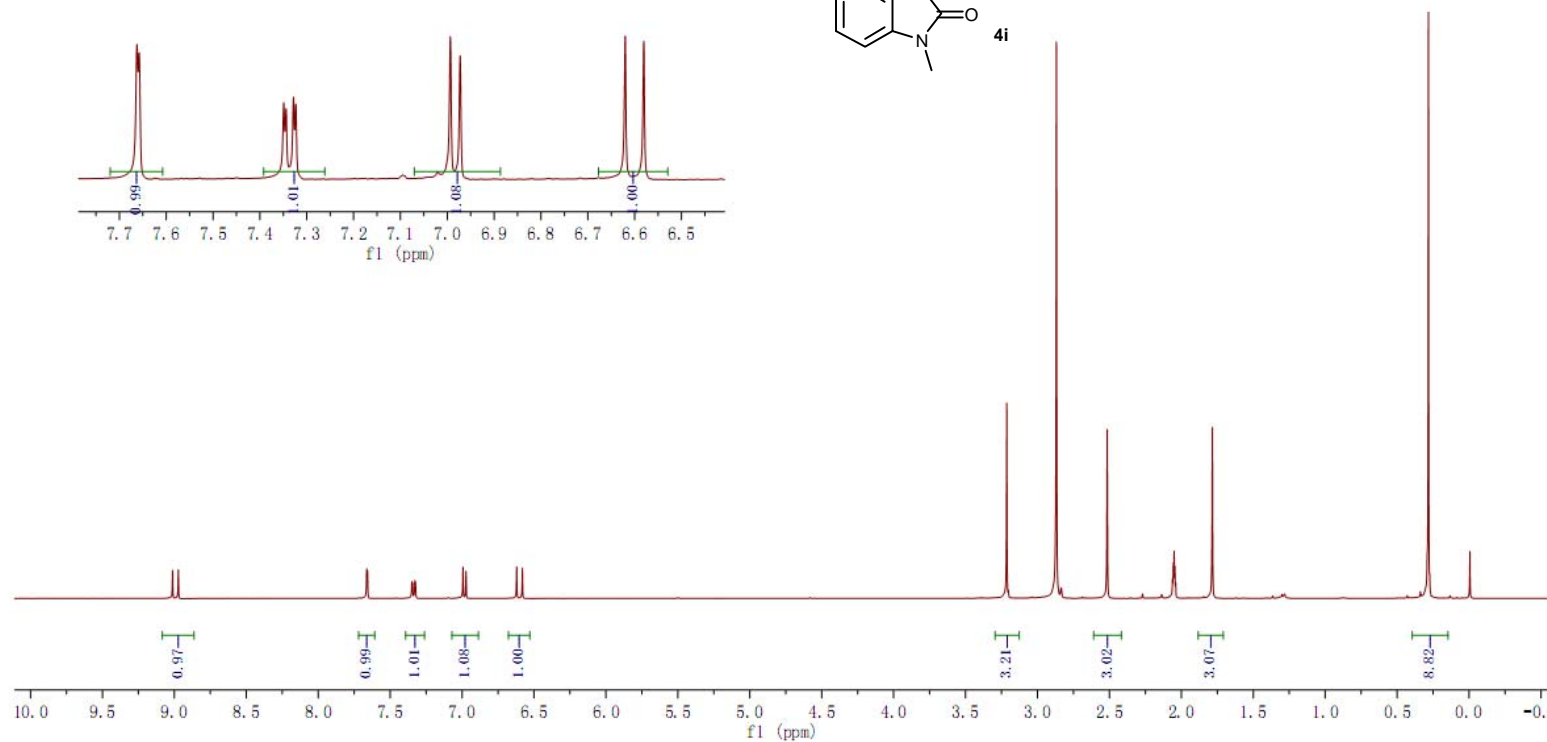

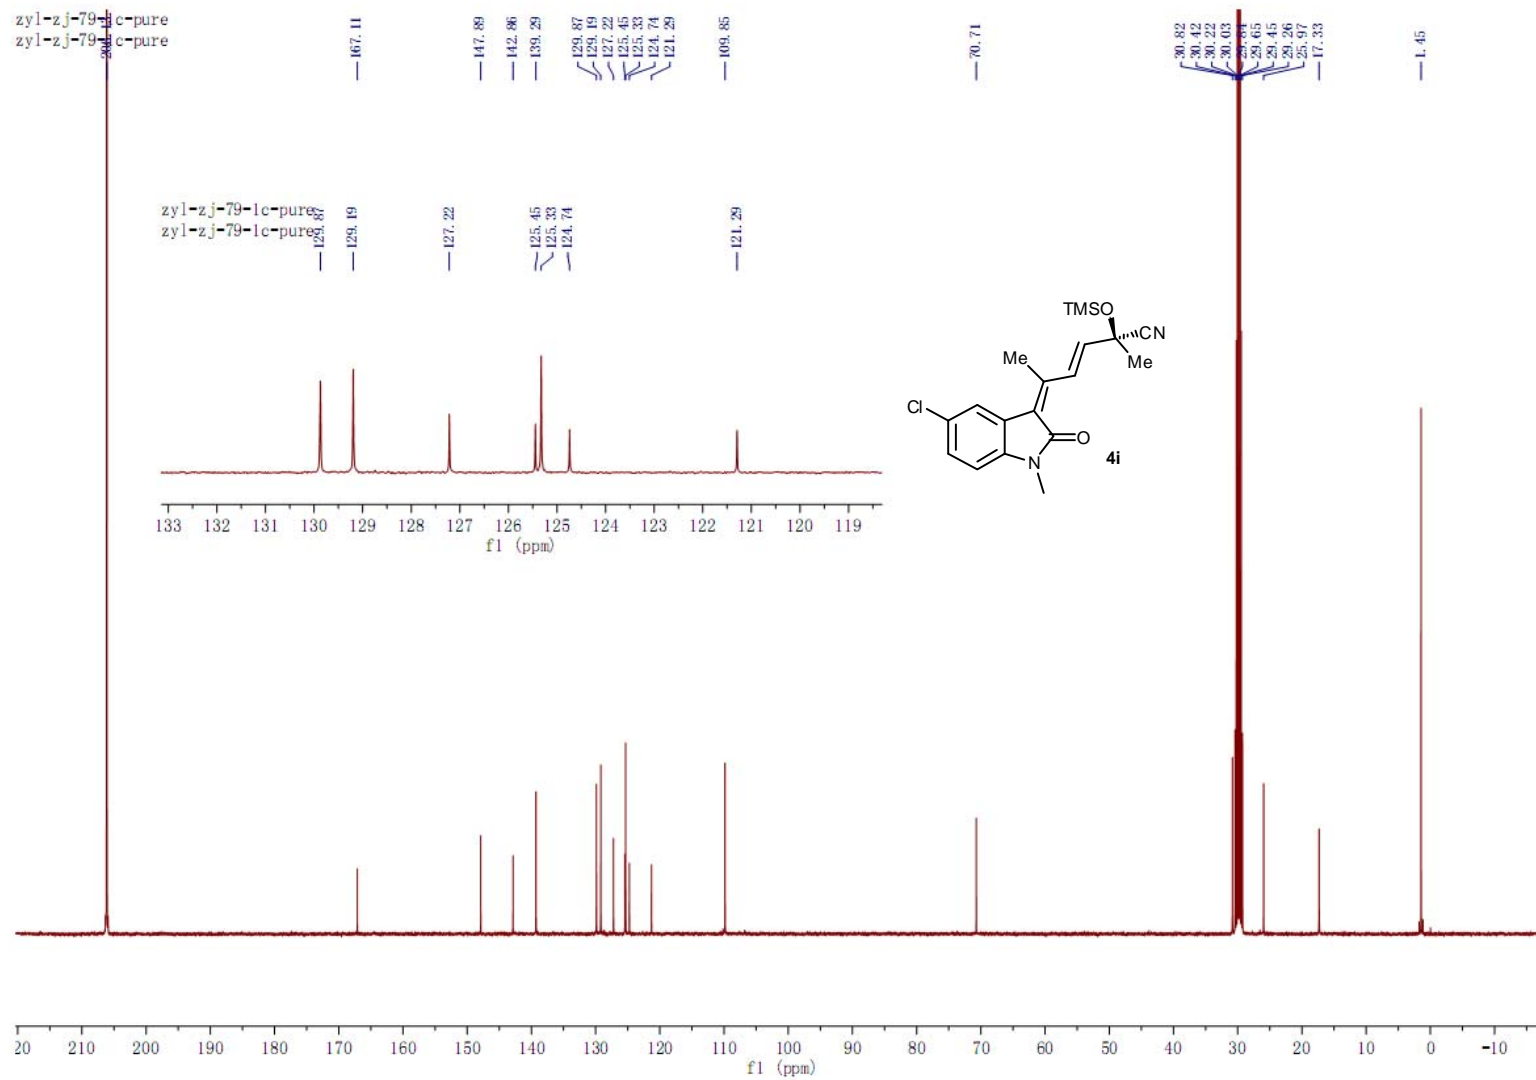

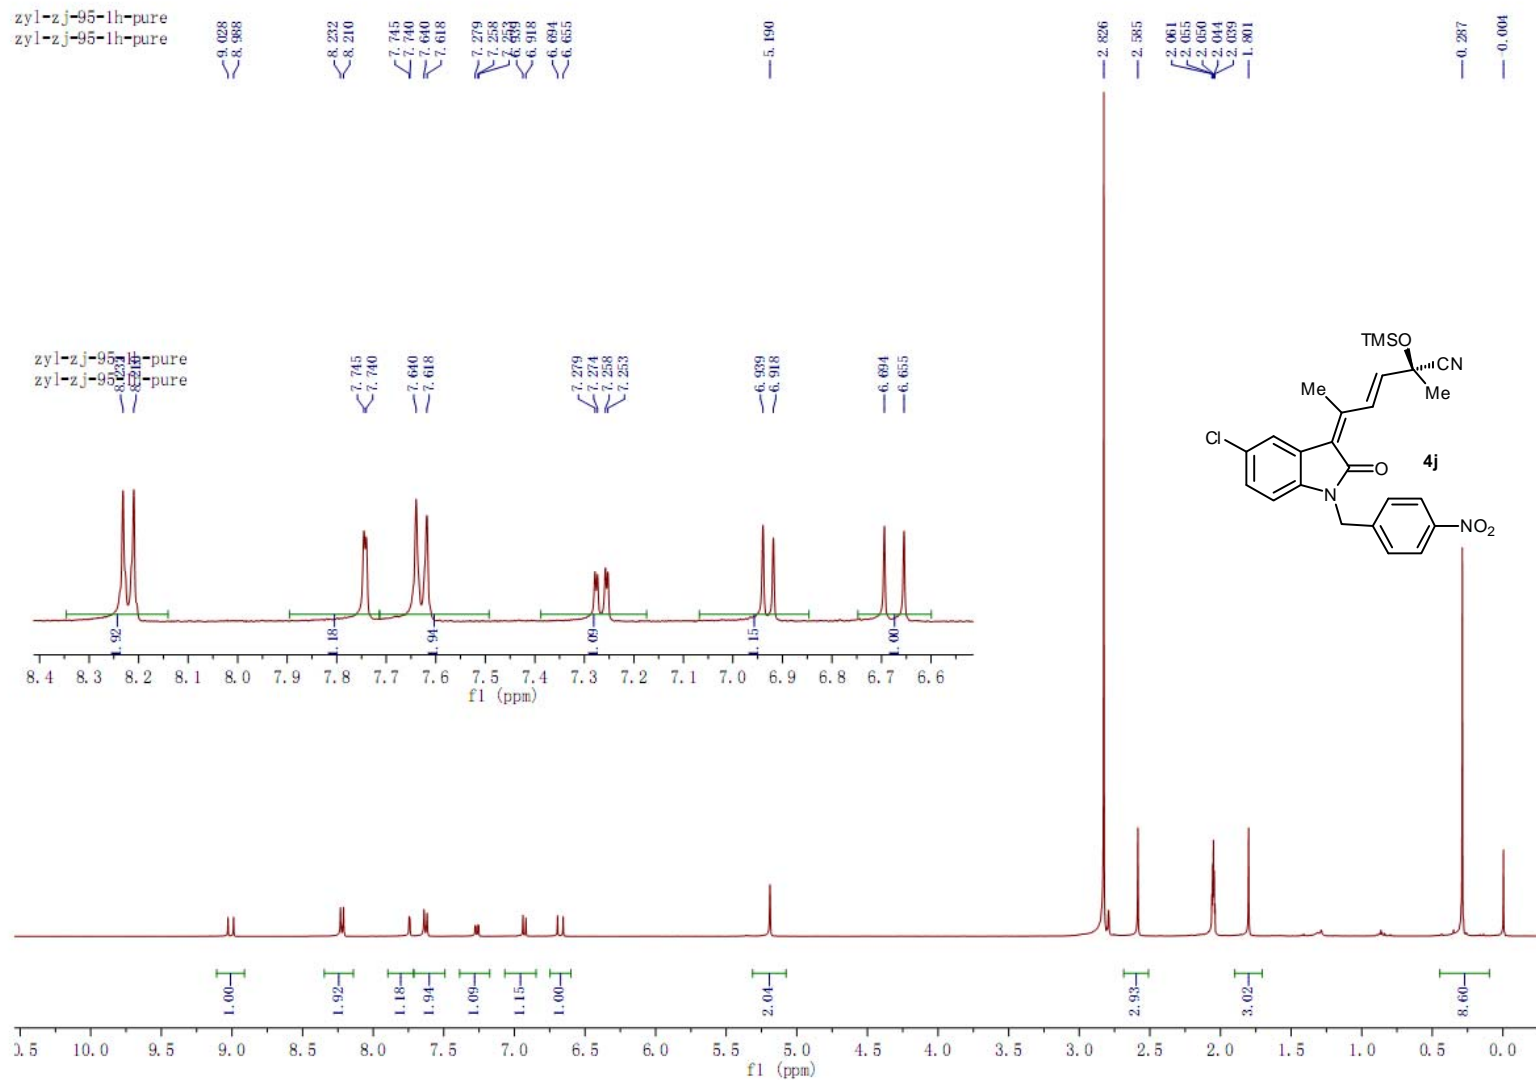

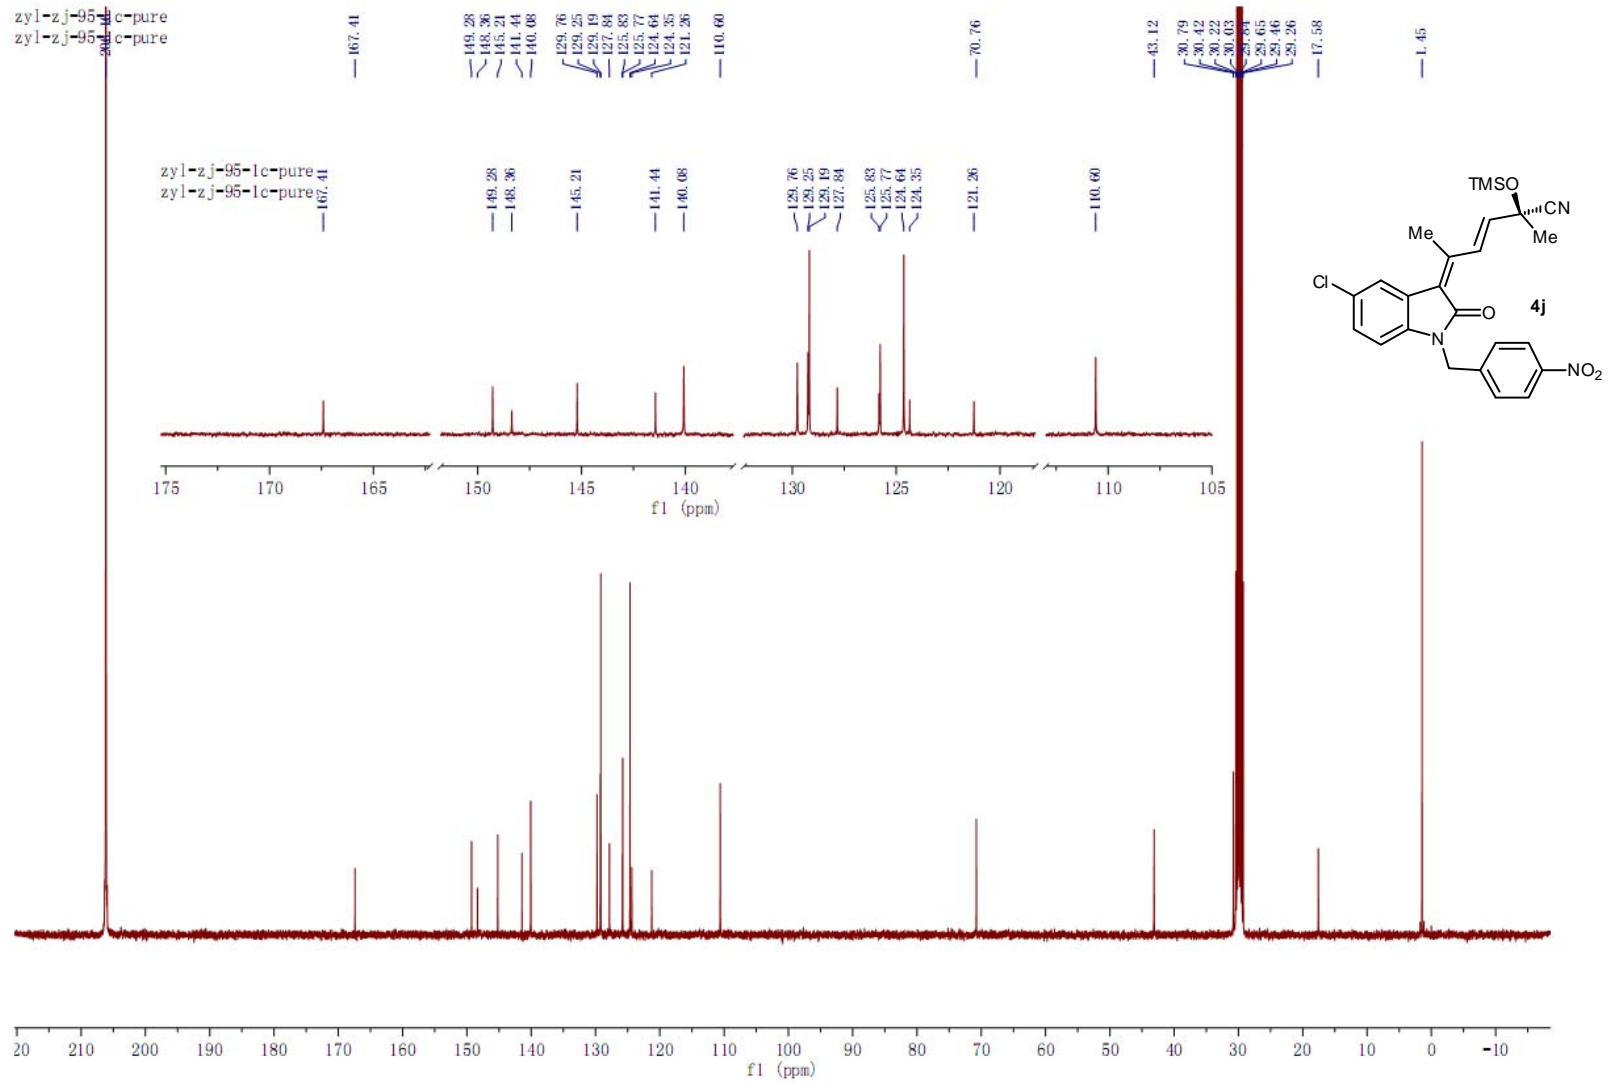

zyl-zj-97-1h-pure  
zyl-zj-97-1h-pure

9.032  
8.993

7.837  
7.833  
7.523  
7.522  
7.506  
7.381  
7.324  
7.303  
7.287  
6.855  
6.672  
6.632

4.999

2.831  
2.561  
2.061  
2.055  
2.050  
2.044  
2.039  
1.799

0.288  
0.004

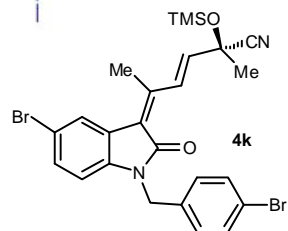

zyl-zj-97-1h-pure  
zyl-zj-97-1h-pure

7.523  
7.502  
7.407  
7.398  
7.381  
7.324  
7.303

6.876  
6.855

6.672  
6.632

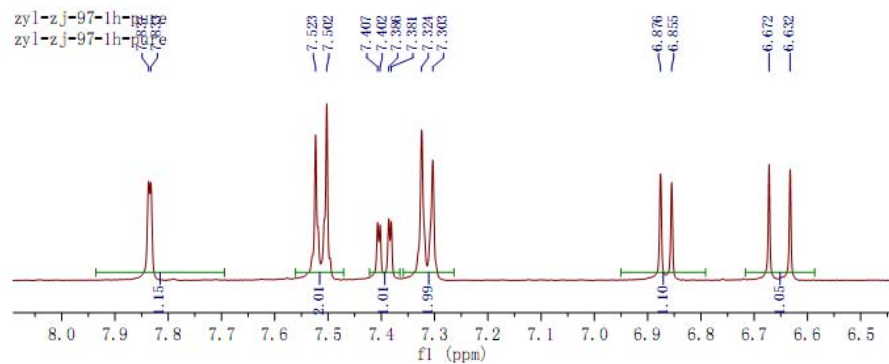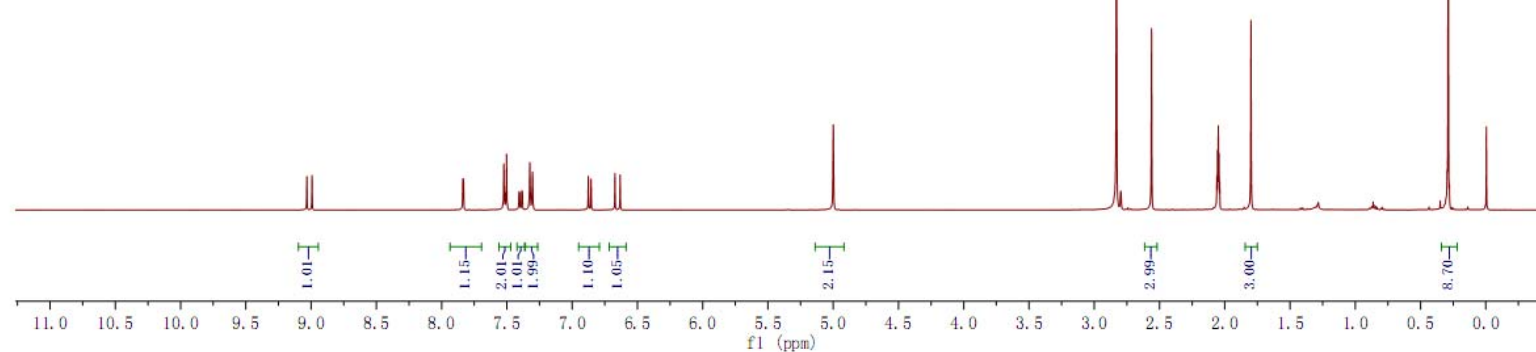

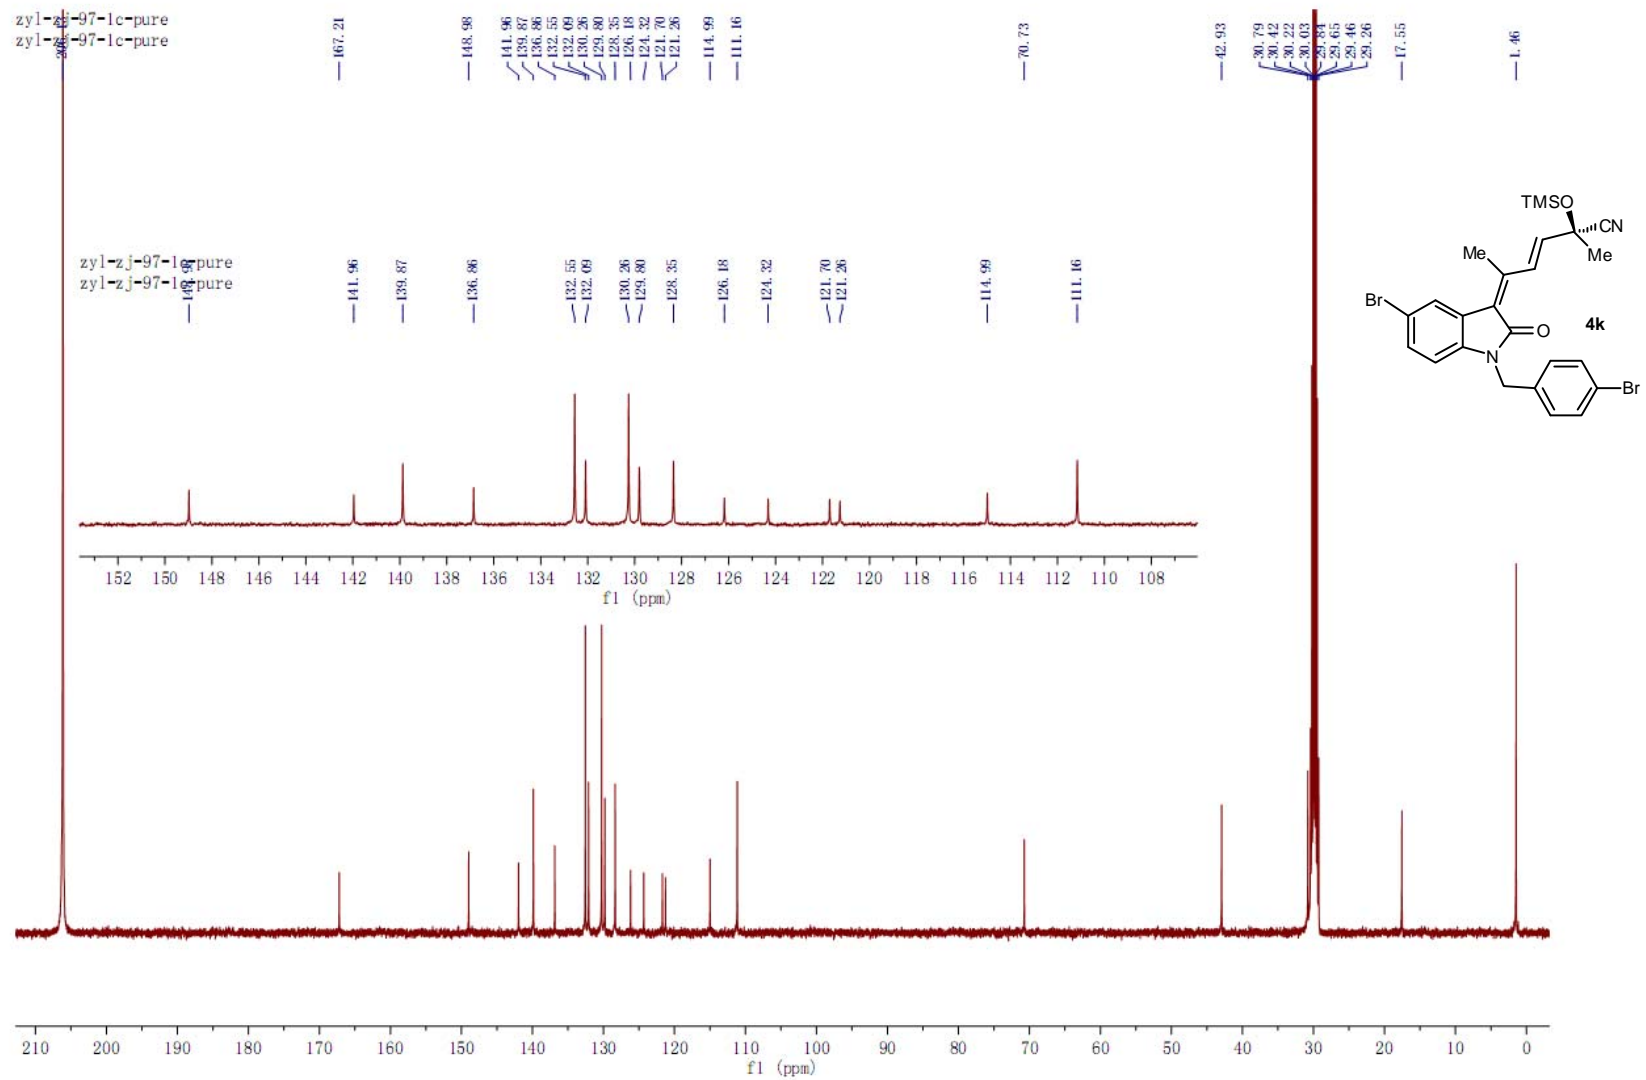



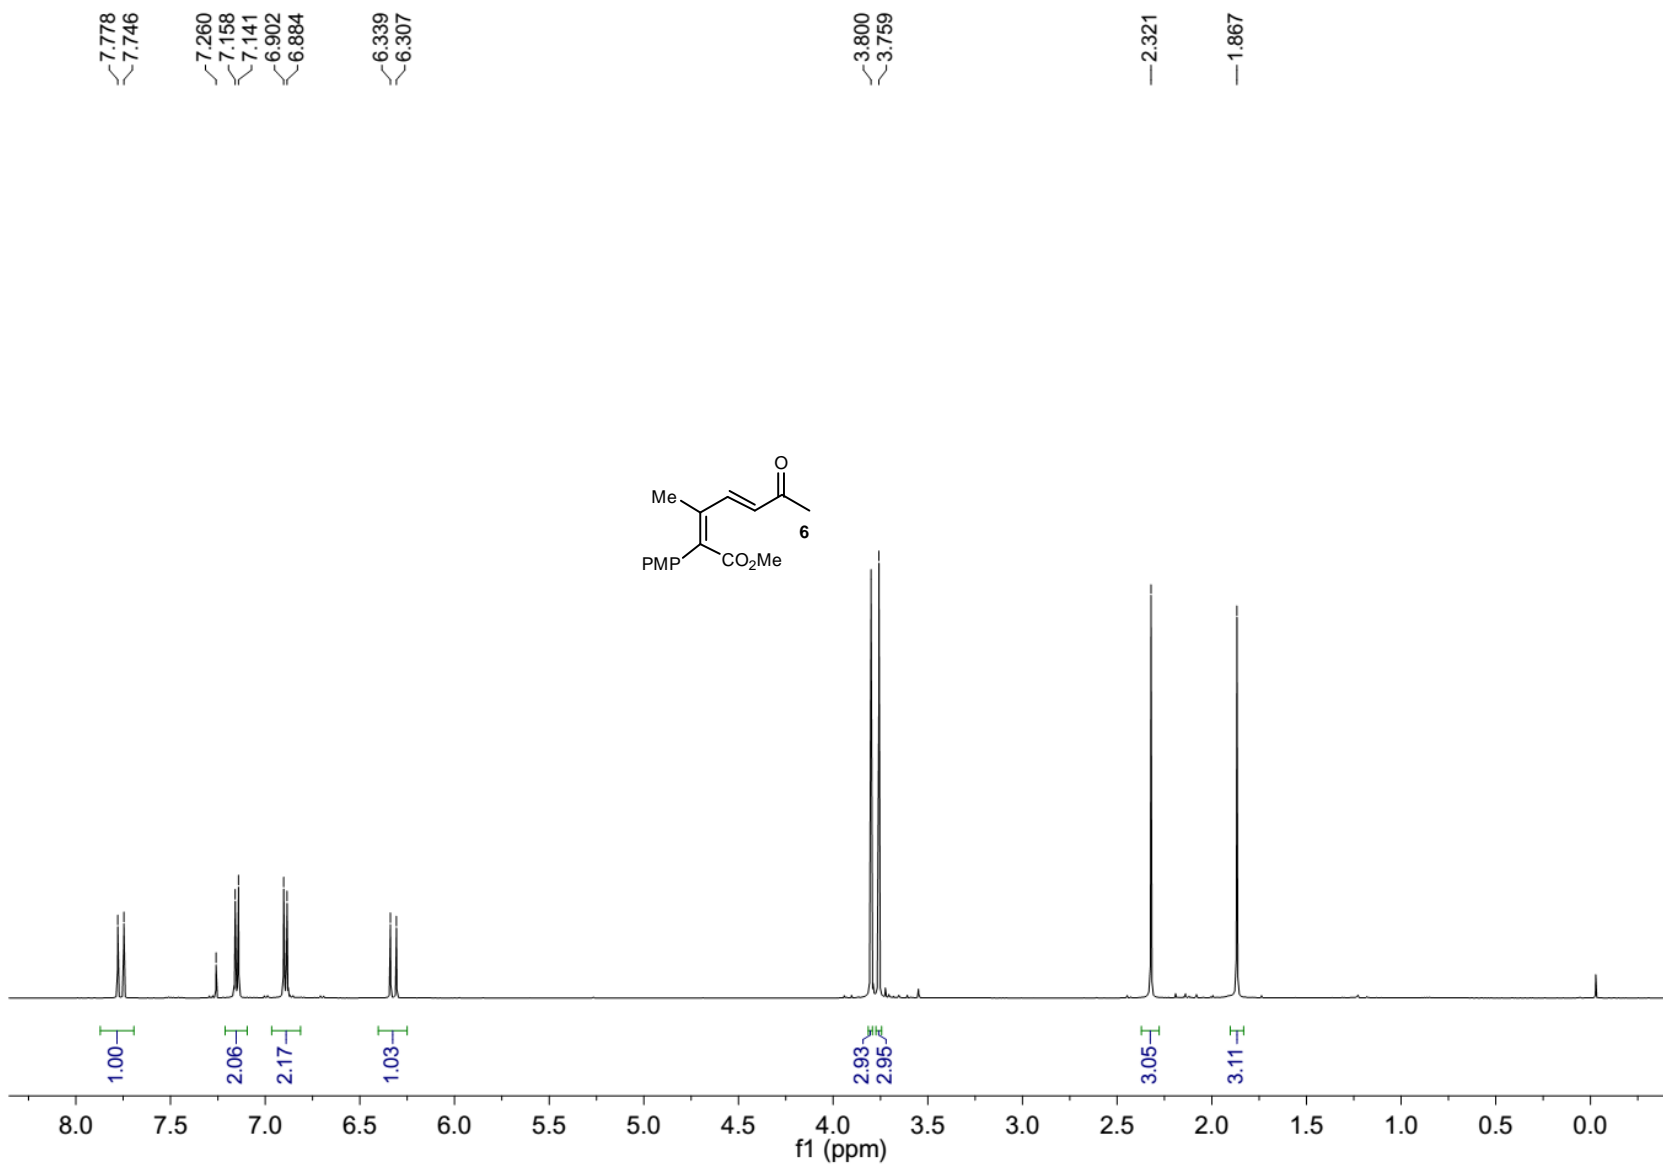

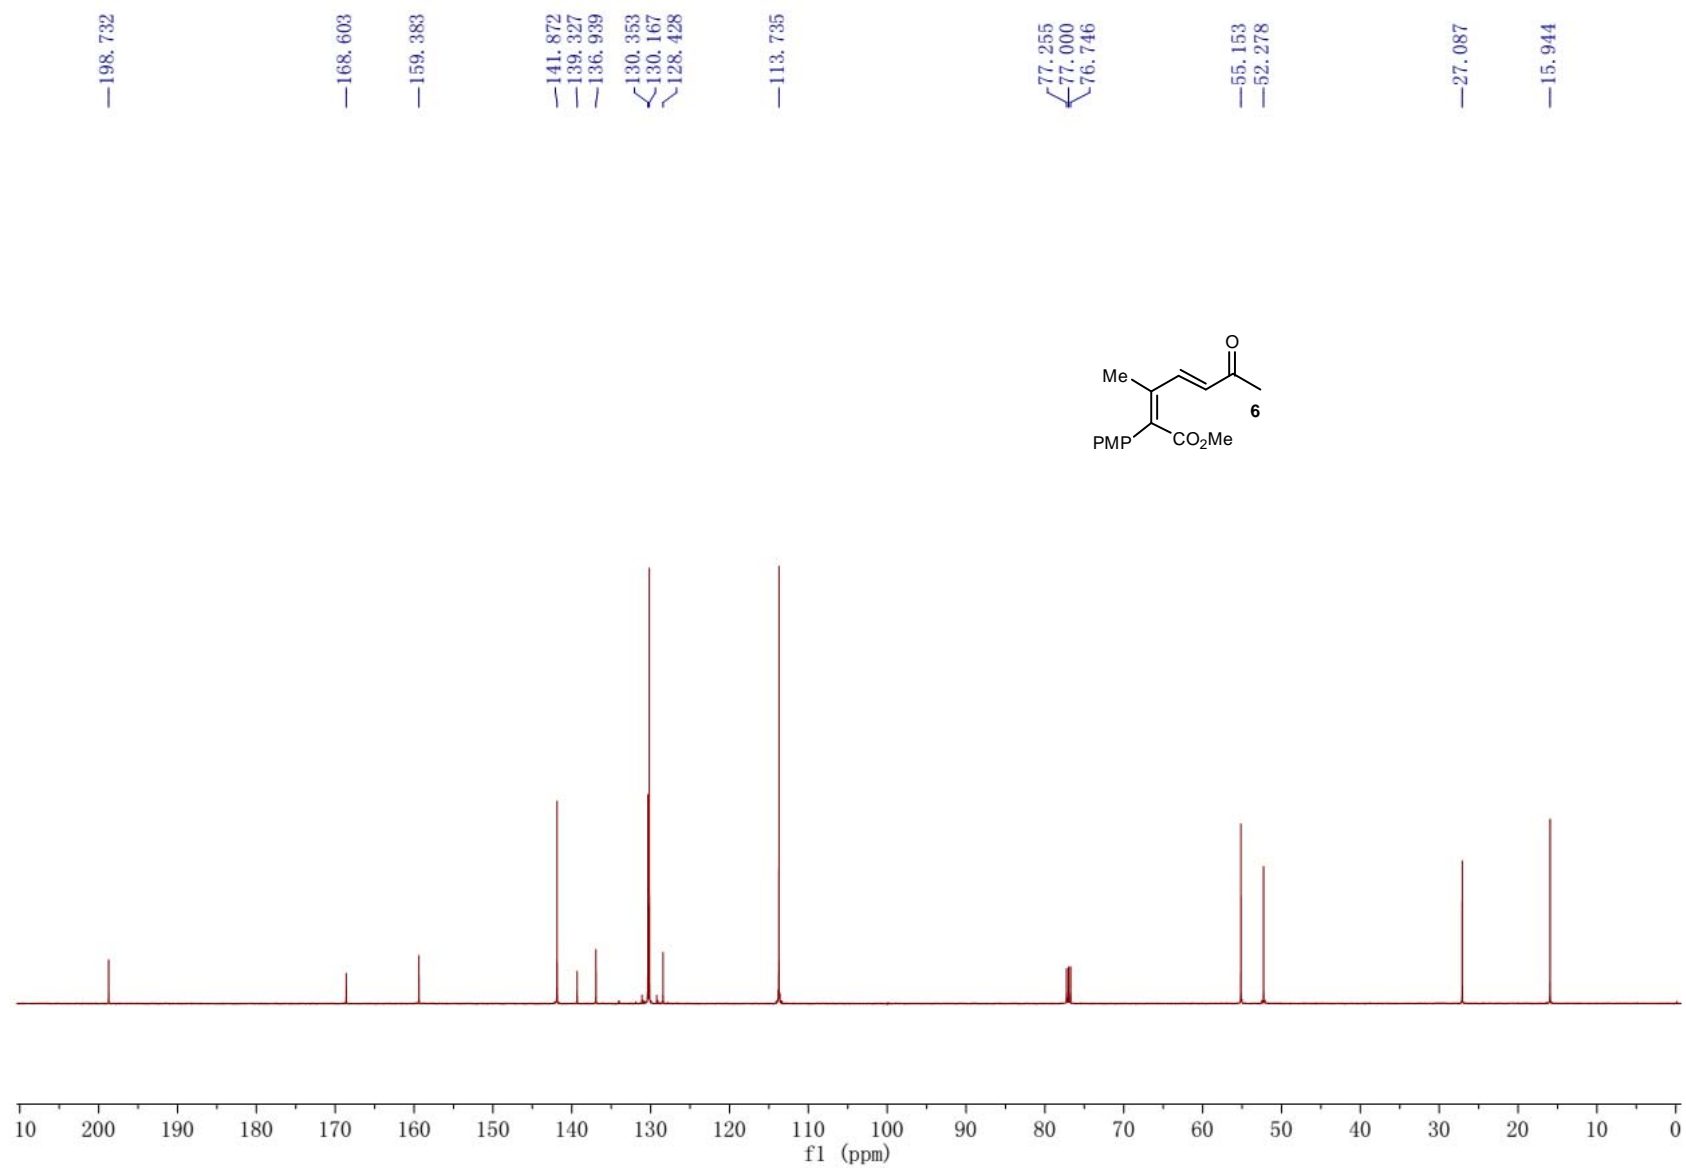

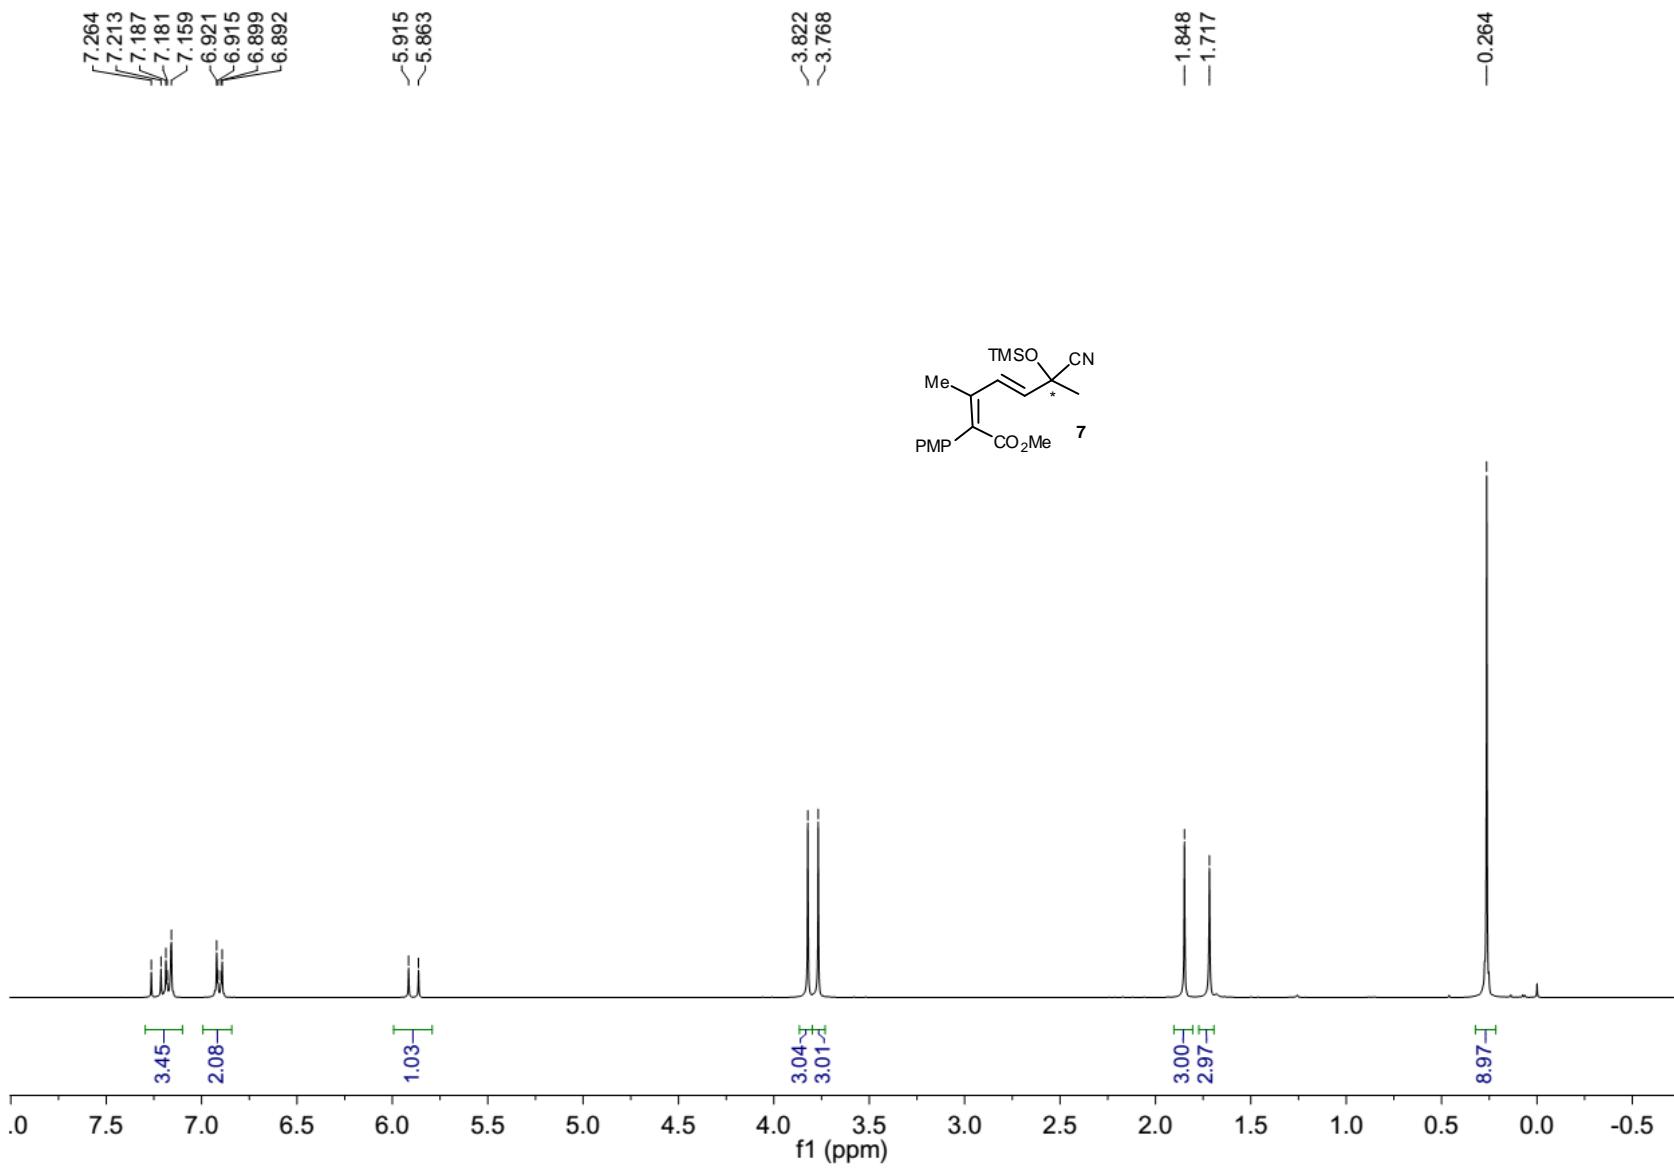



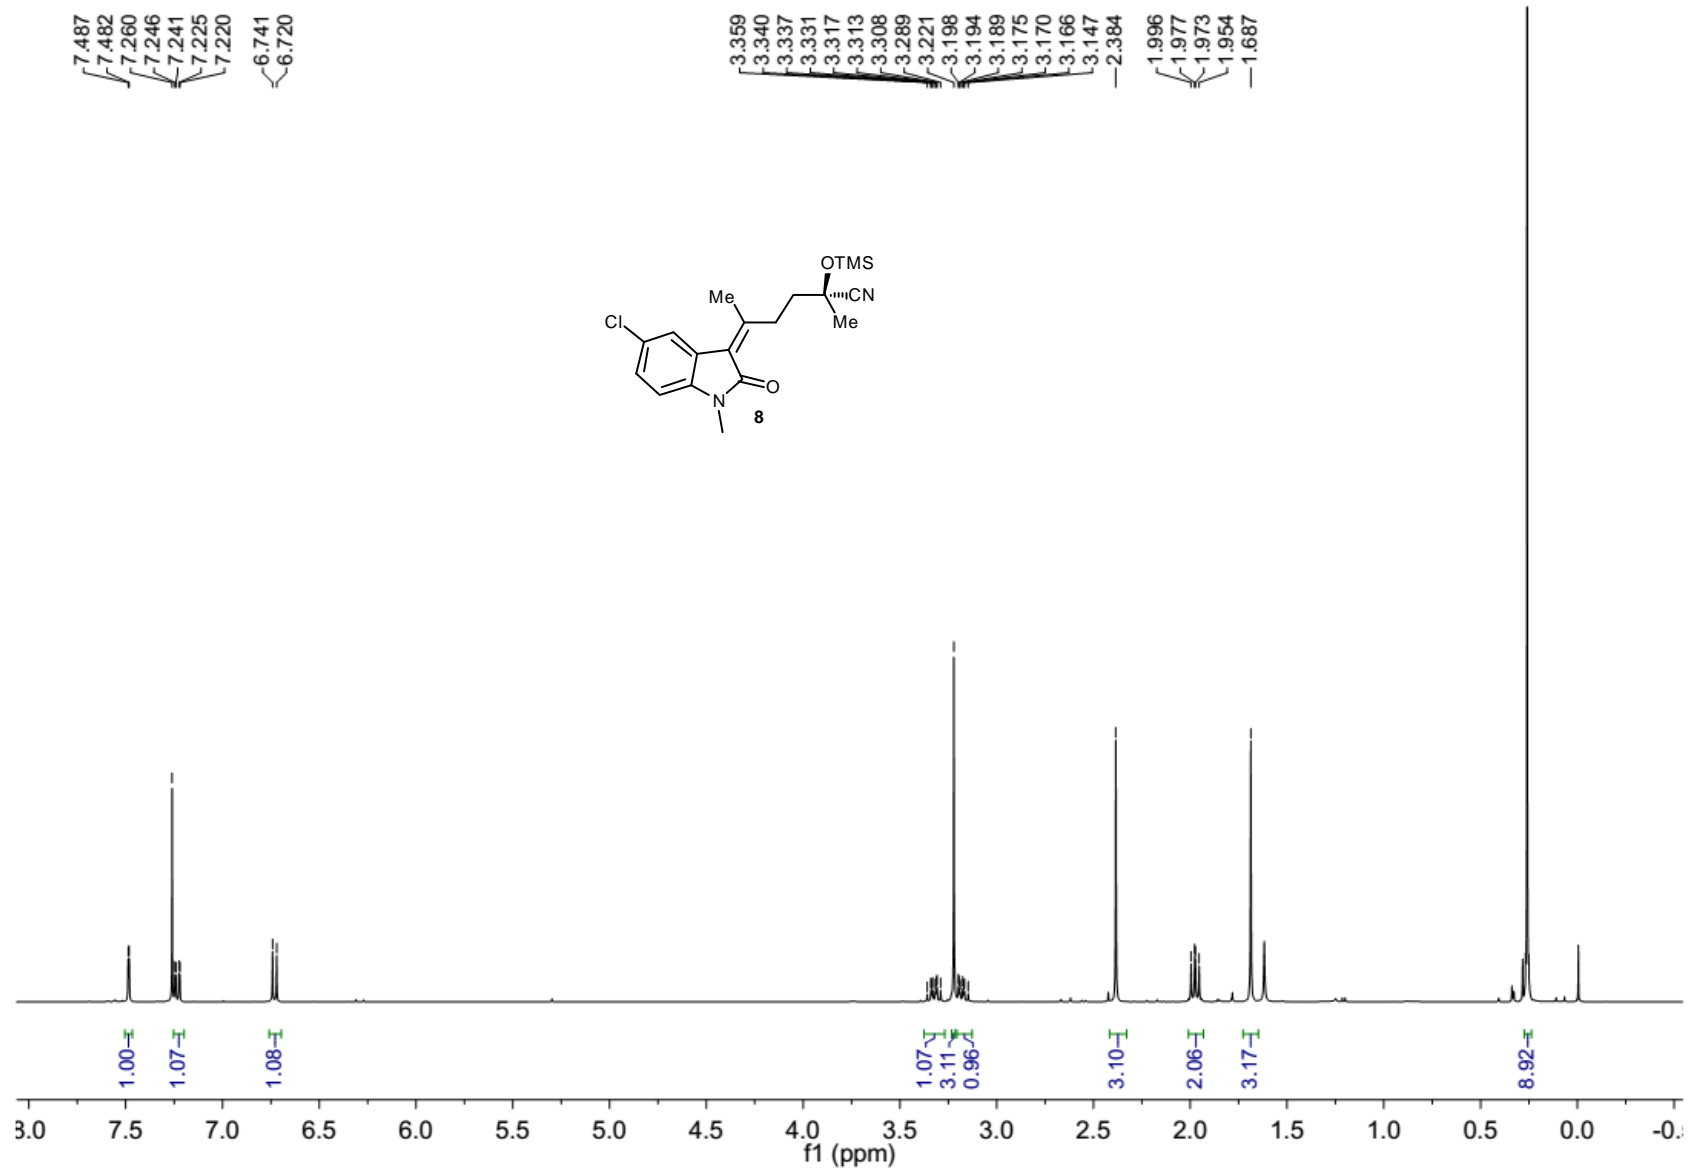

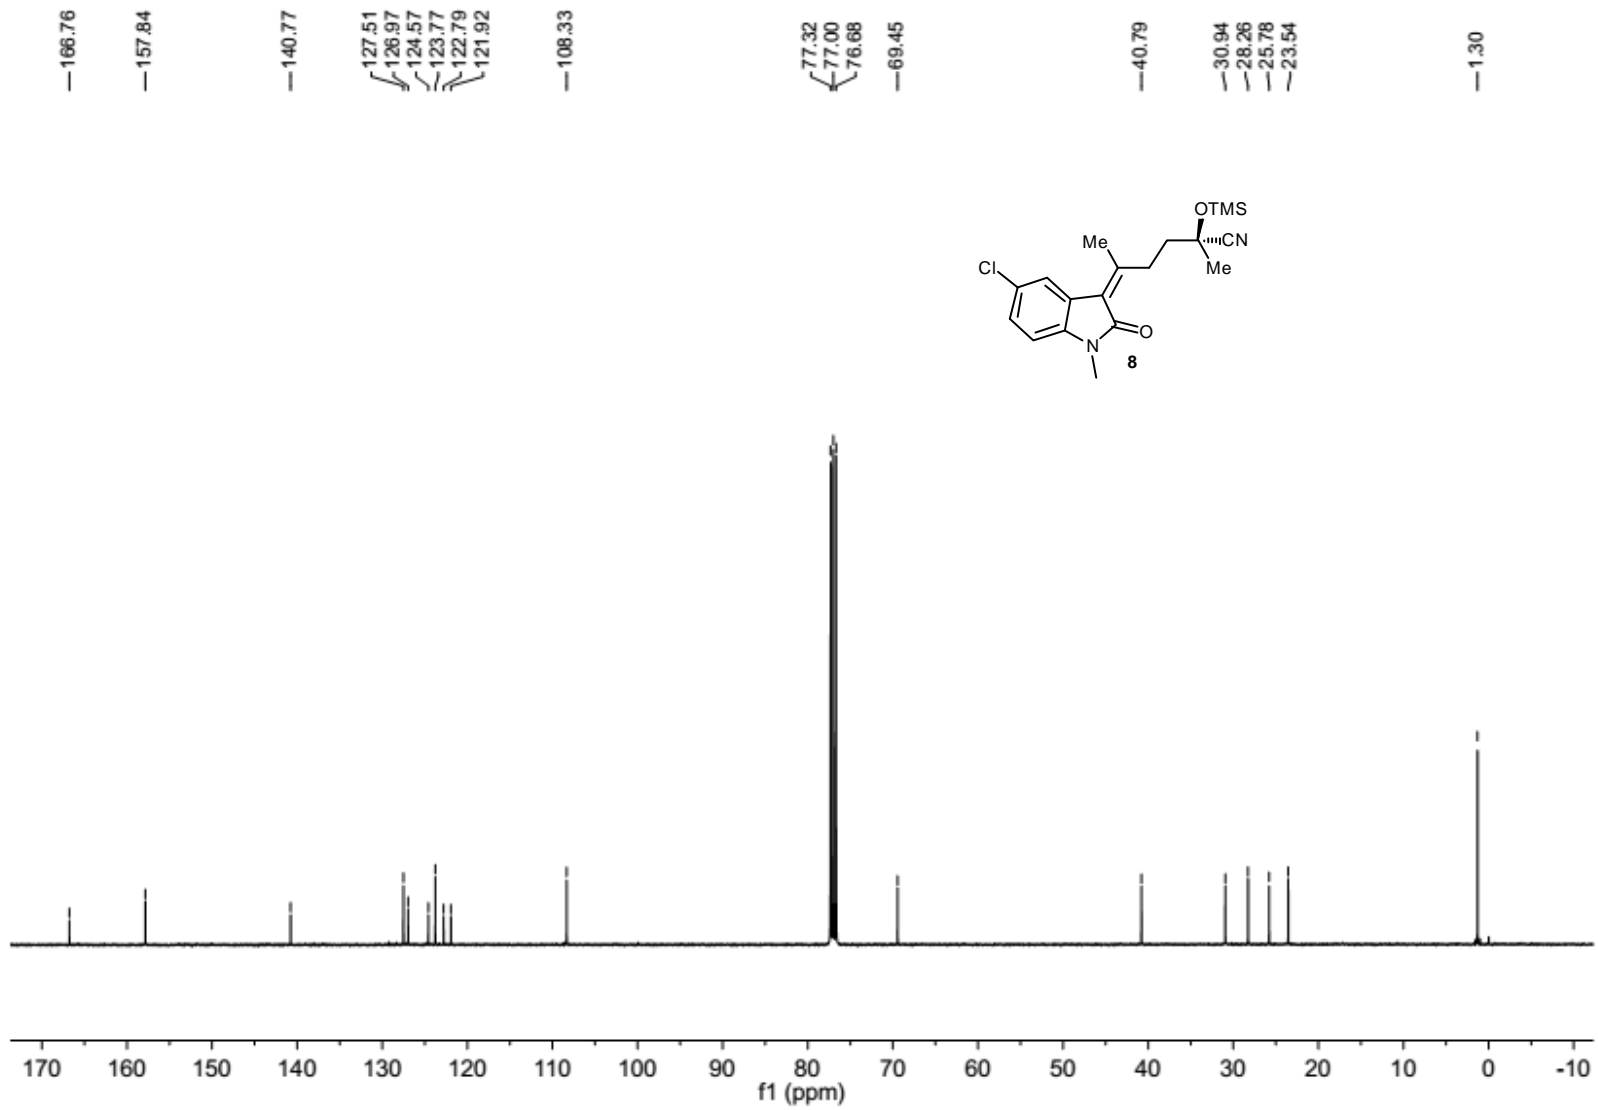

# Analysis Report

## <Sample Information>

Sample Name : CZY-CR-87-RAC-AD-90-10  
 Sample ID :  
 Data Filename : CZY-CR-87-RAC-AD-90-10-需要.lcd  
 Method Filename : WAC-93-FANFA.lcm  
 Batch Filename :  
 Vial # : 1-1  
 Injection Volume : 20 uL  
 Date Acquired : 2015/12/26 22:37:04  
 Date Processed : 2015/12/26 22:48:18

Sample Type : Unknown  
 Acquired by : System Administrator  
 Processed by : System Administrator

## <Chromatogram>

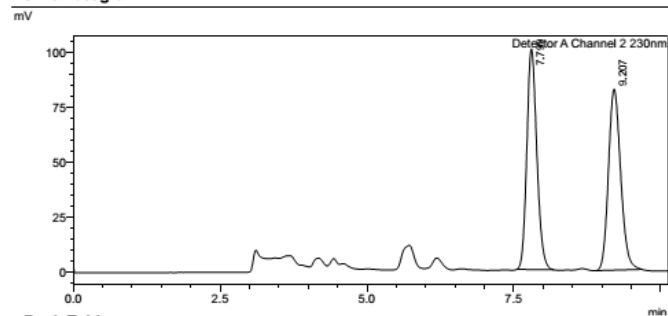

## <Peak Table>

| Peak# | Ret. Time | Area    | Height | Conc.  |
|-------|-----------|---------|--------|--------|
| 1     | 7.799     | 1190151 | 100311 | 49.980 |
| 2     | 9.207     | 1191102 | 82366  | 50.020 |
| Total |           | 2381253 | 182678 |        |

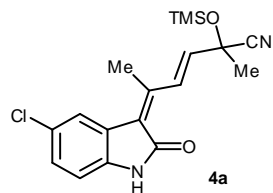

D:\Data\caozhongyan\czy-cr\CZY-CR-87-RAC-AD-90-10-需要.lcd

# Analysis Report

## <Sample Information>

Sample Name : CZY-CR-87-as-AD-90-10  
 Sample ID :  
 Data Filename : CZY-CR-87-as-AD-90-10-RE3.lcd  
 Method Filename : WAC-93-FANFA.lcm  
 Batch Filename :  
 Vial # : 1-1  
 Injection Volume : 20 uL  
 Date Acquired : 2015/12/26 22:56:21  
 Date Processed : 2015/12/26 23:07:23

Sample Type : Unknown  
 Acquired by : System Administrator  
 Processed by : System Administrator

## <Chromatogram>

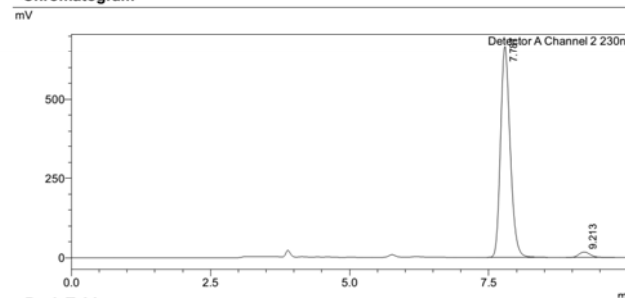

## <Peak Table>

| Peak# | Ret. Time | Area    | Height | Conc.  |
|-------|-----------|---------|--------|--------|
| 1     | 7.787     | 8072347 | 666375 | 96.989 |
| 2     | 9.213     | 250622  | 17303  | 3.011  |
| Total |           | 8322968 | 683678 |        |

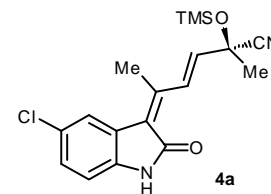

D:\Data\caozhongyan\czy-cr\CZY-CR-87-as-AD-90-10-RE3.lcd

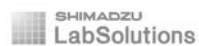

## Analysis Report

### <Sample Information>

Sample Name : ZYL-ZJ-27-4-RAC-ADH-90-10-205-230-1-  
 Sample ID :  
 Data Filename : ZYL-ZJ-27-4-RAC-ADH-90-10-205-230-1-.lcd  
 Method Filename : ZYL-A.lcm  
 Batch Filename :  
 Vial # : 0-0 Sample Type : Unknown  
 Injection Volume : 20 uL  
 Date Acquired : 2014-6-22 18:43:52 Acquired by : System Administrator  
 Date Processed : 2014-6-23 11:16:24 Processed by : System Administrator

### <Chromatogram>

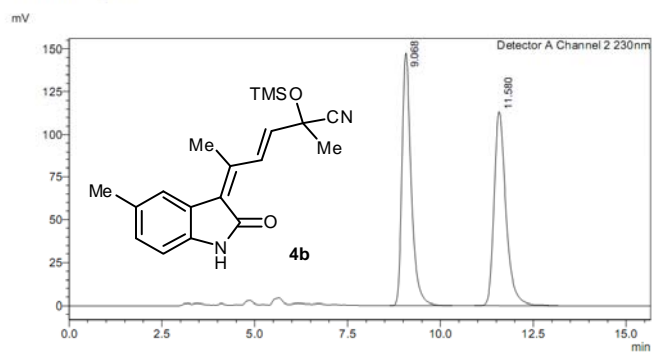

### <Peak Table>

| Detector A Channel 2 230nm |           |         |        |        |      |      |      |
|----------------------------|-----------|---------|--------|--------|------|------|------|
| Peak#                      | Ret. Time | Area    | Height | Conc.  | Unit | Mark | Name |
| 1                          | 9.068     | 2544783 | 147671 | 50.299 |      |      |      |
| 2                          | 11.580    | 2514492 | 113262 | 49.701 |      | S    |      |
| Total                      |           | 5059275 | 260934 |        |      |      |      |

E:\data\zyl\ZYL-ZJ-27-4-RAC-ADH-90-10-205-230-1-.lcd

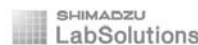

## Analysis Report

### <Sample Information>

Sample Name : ZYL-ZJ-19-4-ASY-ADH-90-10-205-230-1-  
 Sample ID :  
 Data Filename : ZYL-ZJ-19-4-ASY-ADH-90-10-205-230-1-.lcd  
 Method Filename : ZYL-A.lcm  
 Batch Filename :  
 Vial # : 0-0 Sample Type : Unknown  
 Injection Volume : 20 uL  
 Date Acquired : 2014-6-22 19:11:38 Acquired by : System Administrator  
 Date Processed : 2014-6-22 19:26:48 Processed by : System Administrator

### <Chromatogram>

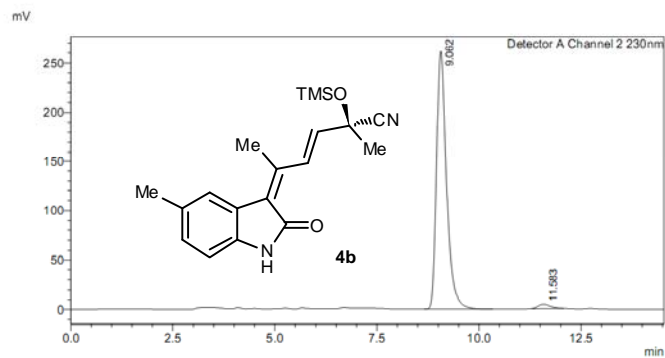

### <Peak Table>

| Detector A Channel 2 230nm |           |         |        |        |      |      |      |
|----------------------------|-----------|---------|--------|--------|------|------|------|
| Peak#                      | Ret. Time | Area    | Height | Conc.  | Unit | Mark | Name |
| 1                          | 9.062     | 4490391 | 261347 | 97.999 |      |      |      |
| 2                          | 11.583    | 91701   | 4486   | 2.001  |      | M    |      |
| Total                      |           | 4582093 | 265834 |        |      |      |      |

E:\data\zyl\ZYL-ZJ-19-4-ASY-ADH-90-10-205-230-1-.lcd



SHIMADZU LabSolutions Analysis Report

## &lt;Sample Information&gt;

Sample Name : ZYL-ZJ-19-9-RAC-ADH-95-5-205-230-1-  
 Sample ID :  
 Data Filename : ZYL-ZJ-19-9-RAC-ADH-95-5-205-230-1-.lcd  
 Method Filename : ZYL-A.lcm  
 Batch Filename :  
 Vial # : 0-0  
 Injection Volume : 20 µL  
 Date Acquired : 2014-6-24 10:18:01  
 Date Processed : 2014-6-24 11:27:43  
 Sample Type : Unknown  
 Acquired by : System Administrator  
 Processed by : System Administrator

## &lt;Chromatogram&gt;

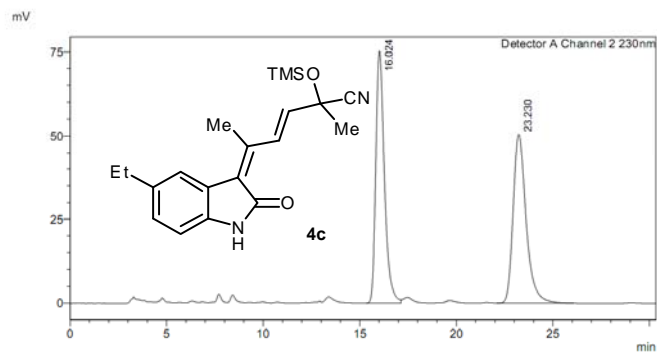

## &lt;Peak Table&gt;

| Detector A Channel 2 230nm |           |         |        |        |      |      |
|----------------------------|-----------|---------|--------|--------|------|------|
| Peak#                      | Ret. Time | Area    | Height | Conc.  | Unit | Mark |
| 1                          | 16.024    | 2321436 | 75211  | 49.635 |      | M    |
| 2                          | 23.230    | 2355568 | 50399  | 50.365 |      | S    |
| Total                      |           | 4677005 | 125610 |        |      |      |

E:\data\zyl\ZYL-ZJ-19-9-RAC-ADH-95-5-205-230-1-.lcd

SHIMADZU LabSolutions Analysis Report

## &lt;Sample Information&gt;

Sample Name : ZYL-ZJ-19-9-ASY-ADH-95-5-205-230-1-  
 Sample ID :  
 Data Filename : ZYL-ZJ-19-9-ASY-ADH-95-5-205-230-1-.lcd  
 Method Filename : ZYL-A.lcm  
 Batch Filename :  
 Vial # : 0-0  
 Injection Volume : 20 µL  
 Date Acquired : 2014-6-24 11:02:15  
 Date Processed : 2014-6-24 11:29:39  
 Sample Type : Unknown  
 Acquired by : System Administrator  
 Processed by : System Administrator

## &lt;Chromatogram&gt;

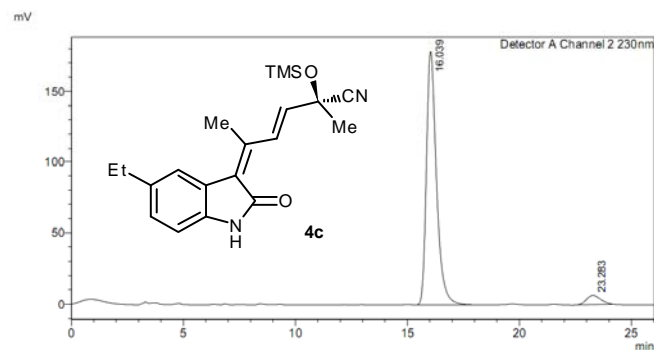

## &lt;Peak Table&gt;

| Detector A Channel 2 230nm |           |         |        |        |      |      |
|----------------------------|-----------|---------|--------|--------|------|------|
| Peak#                      | Ret. Time | Area    | Height | Conc.  | Unit | Mark |
| 1                          | 16.039    | 5560595 | 178572 | 95.027 |      |      |
| 2                          | 23.283    | 291016  | 6596   | 4.973  |      | M    |
| Total                      |           | 5851611 | 185169 |        |      |      |

E:\data\zyl\ZYL-ZJ-19-9-ASY-ADH-95-5-205-230-1-.lcd

SHIMADZU LabSolutions Analysis Report

<Sample Information>

Sample Name : ZYL-ZJ-19-3-RAC-ADH-95-5-205-230-1-  
 Sample ID :  
 Data Filename : ZYL-ZJ-19-3-RAC-ADH-95-5-205-230-1-.lcd  
 Method Filename : ZYL-A.lcm  
 Batch Filename :  
 Vial # : 0-0  
 Injection Volume : 20 uL  
 Date Acquired : 2014-6-23 18:01:28  
 Date Processed : 2014-6-23 18:22:25  
 Sample Type : Unknown  
 Acquired by : System Administrator  
 Processed by : System Administrator

<Chromatogram>

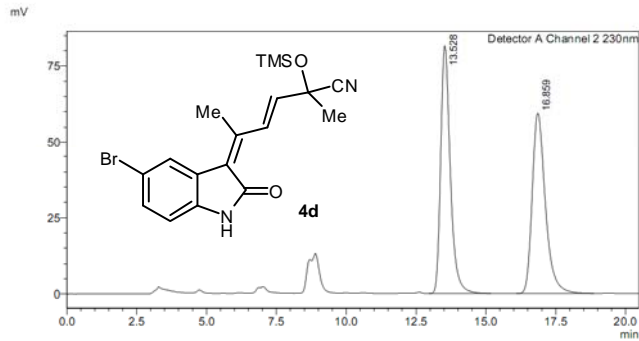

<Peak Table>

| Peak# | Ret. Time | Area    | Height | Conc.  | Unit | Mark | Name |
|-------|-----------|---------|--------|--------|------|------|------|
| 1     | 13.528    | 1955409 | 81499  | 50.042 |      |      |      |
| 2     | 16.859    | 1952158 | 59297  | 49.958 |      | S    |      |
| Total |           | 3907568 | 140796 |        |      |      |      |

E:\data\zyl\ZYL-ZJ-19-3-RAC-ADH-95-5-205-230-1-.lcd

SHIMADZU LabSolutions Analysis Report

<Sample Information>

Sample Name : ZYL-ZJ-19-3-ASY-ADH-95-5-205-230-1-  
 Sample ID :  
 Data Filename : ZYL-ZJ-19-3-ASY-ADH-95-5-205-230-1-.lcd  
 Method Filename : ZYL-A.lcm  
 Batch Filename :  
 Vial # : 0-0  
 Injection Volume : 20 uL  
 Date Acquired : 2014-6-23 18:51:26  
 Date Processed : 2014-6-23 19:12:24  
 Sample Type : Unknown  
 Acquired by : System Administrator  
 Processed by : System Administrator

<Chromatogram>

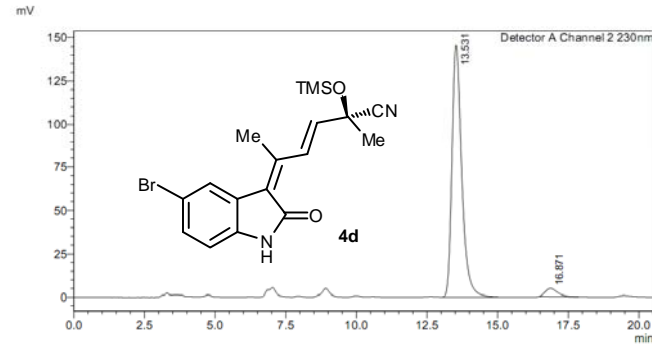

<Peak Table>

| Peak# | Ret. Time | Area    | Height | Conc.  | Unit | Mark | Name |
|-------|-----------|---------|--------|--------|------|------|------|
| 1     | 13.531    | 3502669 | 145644 | 96.085 |      | M    |      |
| 2     | 16.871    | 142724  | 4749   | 3.915  |      | M    |      |
| Total |           | 3645392 | 150393 |        |      |      |      |

E:\data\zyl\ZYL-ZJ-19-3-ASY-ADH-95-5-205-230-1-.lcd

SHIMADZU LabSolutions Analysis Report

## &lt;Sample Information&gt;

Sample Name : ZYL-ZJ-27-8-RAC-ADH-95-5-205-230-1-  
 Sample ID :  
 Data Filename : ZYL-ZJ-27-8-RAC-ADH-95-5-205-230-1-.lcd  
 Method Filename : ZYL-A.lcm  
 Batch Filename :  
 Vial # : 0-0  
 Injection Volume : 20 uL  
 Date Acquired : 2014-6-28 15:12:05  
 Date Processed : 2014-6-28 15:44:53  
 Sample Type : Unknown  
 Acquired by : System Administrator  
 Processed by : System Administrator

## &lt;Chromatogram&gt;

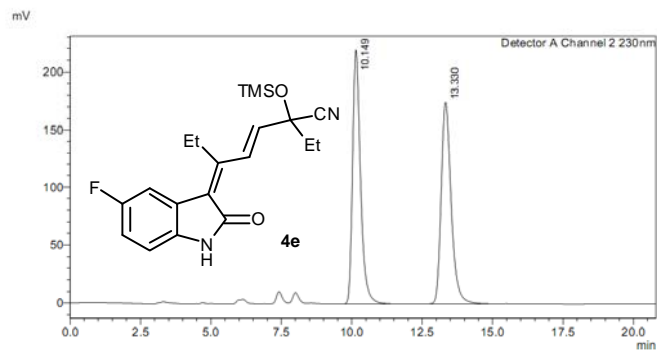

## &lt;Peak Table&gt;

| Detector A Channel 2 230nm |           |         |        |        |      |      |
|----------------------------|-----------|---------|--------|--------|------|------|
| Peak#                      | Ret. Time | Area    | Height | Conc.  | Unit | Name |
| 1                          | 10.149    | 4321611 | 219344 | 49.953 |      |      |
| 2                          | 13.330    | 4329744 | 174463 | 50.047 |      |      |
| Total                      |           | 8651355 | 393806 |        |      |      |

E:\data\zyl\ZYL-ZJ-27-8-RAC-ADH-95-5-205-230-1-.lcd

SHIMADZU LabSolutions Analysis Report

## &lt;Sample Information&gt;

Sample Name : ZYL-ZJ-29-1-ASY-ADH-95-5-205-230-1-  
 Sample ID :  
 Data Filename : ZYL-ZJ-29-1-ASY-ADH-95-5-205-230-1-.lcd  
 Method Filename : ZYL-A.lcm  
 Batch Filename :  
 Vial # : 0-0  
 Injection Volume : 20 uL  
 Date Acquired : 2014-6-28 15:41:59  
 Date Processed : 2014-6-28 16:00:07  
 Sample Type : Unknown  
 Acquired by : System Administrator  
 Processed by : System Administrator

## &lt;Chromatogram&gt;

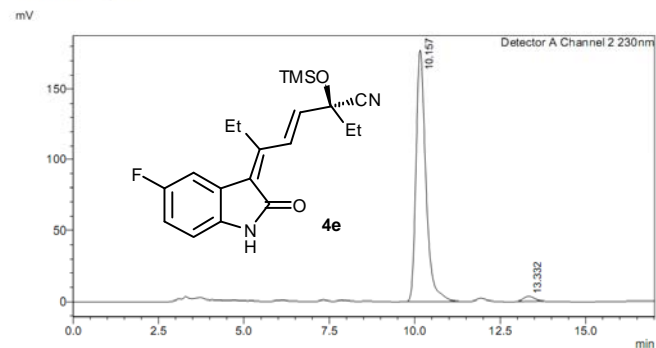

## &lt;Peak Table&gt;

| Detector A Channel 2 230nm |           |         |        |        |      |      |
|----------------------------|-----------|---------|--------|--------|------|------|
| Peak#                      | Ret. Time | Area    | Height | Conc.  | Unit | Name |
| 1                          | 10.157    | 3555705 | 177616 | 98.057 | M    |      |
| 2                          | 13.332    | 70466   | 3289   | 1.943  | M    |      |
| Total                      |           | 3626170 | 180905 |        |      |      |

E:\data\zyl\ZYL-ZJ-29-1-ASY-ADH-95-5-205-230-1-.lcd

SHIMADZU LabSolutions Analysis Report

## &lt;Sample Information&gt;

Sample Name : ZYL-ZJ-19-8--RAC-ADH-90-10-205-230-1-  
 Sample ID :  
 Data Filename : ZYL-ZJ-19-8--RAC-ADH-90-10-205-230-1-.lcd  
 Method Filename : ZYL-A.lcm  
 Batch Filename :  
 Vial # : 0-0  
 Injection Volume : 20 uL  
 Date Acquired : 2014-6-23 10:46:27  
 Date Processed : 2014-6-23 10:57:17  
 Sample Type : Unknown  
 Acquired by : System Administrator  
 Processed by : System Administrator

## &lt;Chromatogram&gt;

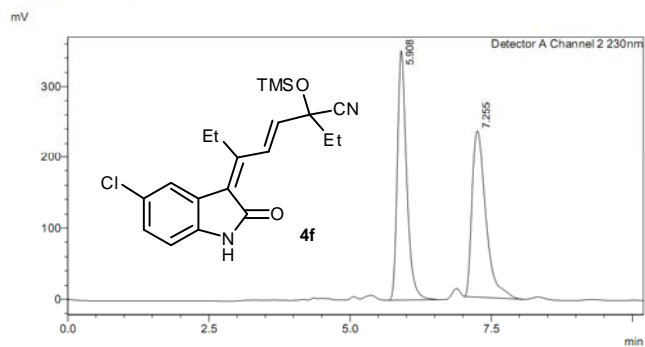

## &lt;Peak Table&gt;

| Detector A Channel 2 230nm |           |         |        |        |      |      |      |
|----------------------------|-----------|---------|--------|--------|------|------|------|
| Peak#                      | Ret. Time | Area    | Height | Conc.  | Unit | Mark | Name |
| 1                          | 5.908     | 4027160 | 350787 | 50.196 |      |      |      |
| 2                          | 7.255     | 3995708 | 233859 | 49.804 |      |      |      |
| Total                      |           | 8022868 | 584646 |        |      |      |      |

E:\data\zyl\ZYL-ZJ-19-8--RAC-ADH-90-10-205-230-1-.lcd

SHIMADZU LabSolutions Analysis Report

## &lt;Sample Information&gt;

Sample Name : ZYL-ZJ-19-8--ASY-ADH-90-10-205-230-1-  
 Sample ID :  
 Data Filename : ZYL-ZJ-19-8--ASY-ADH-90-10-205-230-1-.lcd  
 Method Filename : ZYL-A.lcm  
 Batch Filename :  
 Vial # : 0-0  
 Injection Volume : 20 uL  
 Date Acquired : 2014-6-23 10:32:41  
 Date Processed : 2014-6-23 10:43:20  
 Sample Type : Unknown  
 Acquired by : System Administrator  
 Processed by : System Administrator

## &lt;Chromatogram&gt;

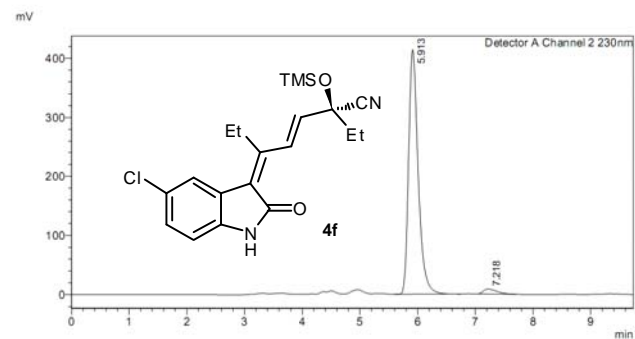

## &lt;Peak Table&gt;

| Detector A Channel 2 230nm |           |         |        |        |      |      |      |
|----------------------------|-----------|---------|--------|--------|------|------|------|
| Peak#                      | Ret. Time | Area    | Height | Conc.  | Unit | Mark | Name |
| 1                          | 5.913     | 4761103 | 413779 | 97.144 |      | M    |      |
| 2                          | 7.218     | 139953  | 8416   | 2.856  |      | M    |      |
| Total                      |           | 4901055 | 422196 |        |      |      |      |

E:\data\zyl\ZYL-ZJ-19-8--ASY-ADH-90-10-205-230-1-.lcd

SHIMADZU LabSolutions Analysis Report

## &lt;Sample Information&gt;

Sample Name : ZYL-ZJ-27-9-RAC-ADH-95-5-205-230-1-  
 Sample ID :  
 Data Filename : ZYL-ZJ-27-9-RAC-ADH-95-5-205-230-1-.lcd  
 Method Filename : ZYL-A.lcm  
 Batch Filename :  
 Vial # :  
 Injection Volume : 20 uL Sample Type : Unknown  
 Date Acquired : 2014-6-28 16:06:48 Acquired by : System Administrator  
 Date Processed : 2014-6-28 16:26:30 Processed by : System Administrator

## &lt;Chromatogram&gt;

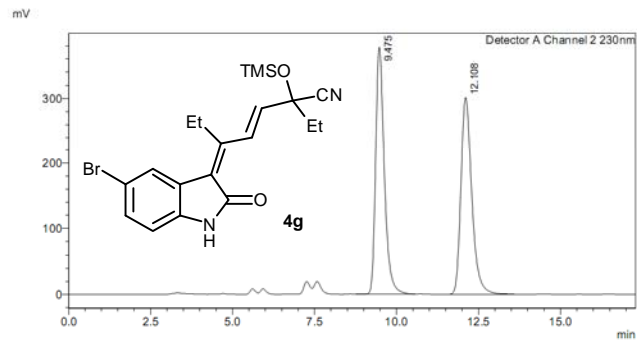

## &lt;Peak Table&gt;

| Detector A Channel 2 230nm |           |          |        |        |      |      |
|----------------------------|-----------|----------|--------|--------|------|------|
| Peak#                      | Ret. Time | Area     | Height | Conc.  | Unit | Name |
| 1                          | 9.475     | 6938523  | 377380 | 49.894 |      |      |
| 2                          | 12.108    | 6967943  | 301550 | 50.106 |      |      |
| Total                      |           | 13906465 | 678930 |        |      |      |

E:\data\zyl\ZYL-ZJ-27-9-RAC-ADH-95-5-205-230-1-.lcd

SHIMADZU LabSolutions Analysis Report

## &lt;Sample Information&gt;

Sample Name : ZYL-ZJ-29-2-ASY-ADH-95-5-205-230-1-  
 Sample ID :  
 Data Filename : ZYL-ZJ-29-2-ASY-ADH-95-5-205-230-1-.lcd  
 Method Filename : ZYL-A.lcm  
 Batch Filename :  
 Vial # : 0-0 Sample Type : Unknown  
 Injection Volume : 20 uL  
 Date Acquired : 2014-6-28 17:02:09 Acquired by : System Administrator  
 Date Processed : 2014-6-28 17:19:53 Processed by : System Administrator

## &lt;Chromatogram&gt;

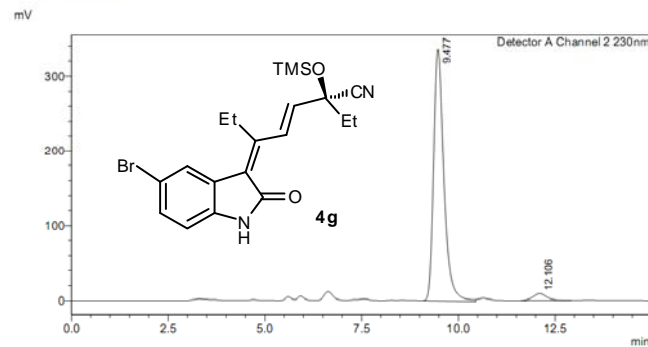

## &lt;Peak Table&gt;

| Detector A Channel 2 230nm |           |         |        |        |      |      |
|----------------------------|-----------|---------|--------|--------|------|------|
| Peak#                      | Ret. Time | Area    | Height | Conc.  | Unit | Name |
| 1                          | 9.477     | 6244229 | 335963 | 96.424 | M    |      |
| 2                          | 12.106    | 231546  | 9264   | 3.576  | M    |      |
| Total                      |           | 6475775 | 345228 |        |      |      |

E:\data\zyl\ZYL-ZJ-29-2-ASY-ADH-95-5-205-230-1-.lcd

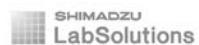

## Analysis Report

### <Sample Information>

Sample Name : ZYL-ZJ-75-RAC-IE-95-5-205-230-1-  
 Sample ID :  
 Data Filename : ZYL-ZJ-75-RAC-IE-95-5-205-230-1-.lcd  
 Method Filename : ZYL-A.lcm  
 Batch Filename :  
 Vial # : 0-0  
 Injection Volume : 20 µL  
 Date Acquired : 2014-8-25 16:10:56  
 Date Processed : 2014-8-25 17:00:32

Sample Type : Unknown  
 Acquired by : System Administrator  
 Processed by : System Administrator

### <Chromatogram>

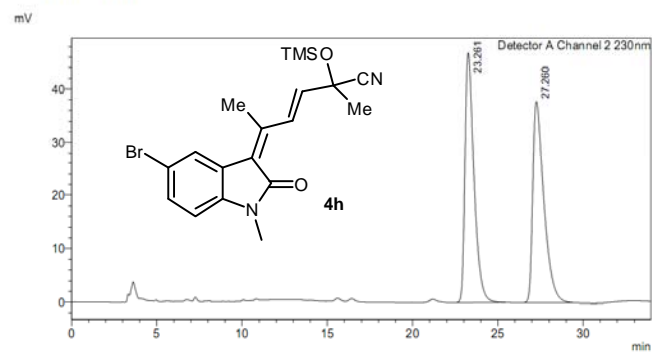

### <Peak Table>

| Detector A Channel 2 230nm |           |         |        |        |      |      |
|----------------------------|-----------|---------|--------|--------|------|------|
| Peak#                      | Ret. Time | Area    | Height | Conc.  | Unit | Name |
| 1                          | 23.261    | 1733766 | 46964  | 50.130 | S    |      |
| 2                          | 27.260    | 1724799 | 37836  | 49.870 | S    |      |
| Total                      |           | 3458565 | 84800  |        |      |      |

E:\data\zyl\ZYL-ZJ-75-RAC-IE-95-5-205-230-1-.lcd

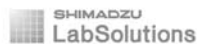

## Analysis Report

### <Sample Information>

Sample Name : ZYL-ZJ-75-ASY--IE-95-5-205-230-1-  
 Sample ID :  
 Data Filename : ZYL-ZJ-75-ASY--IE-95-5-205-230-1-.lcd  
 Method Filename : ZYL-A.lcm  
 Batch Filename :  
 Vial # : 0-0  
 Injection Volume : 20 µL  
 Date Acquired : 2014-8-25 18:11:10  
 Date Processed : 2014-8-25 18:51:54

Sample Type : Unknown  
 Acquired by : System Administrator  
 Processed by : System Administrator

### <Chromatogram>

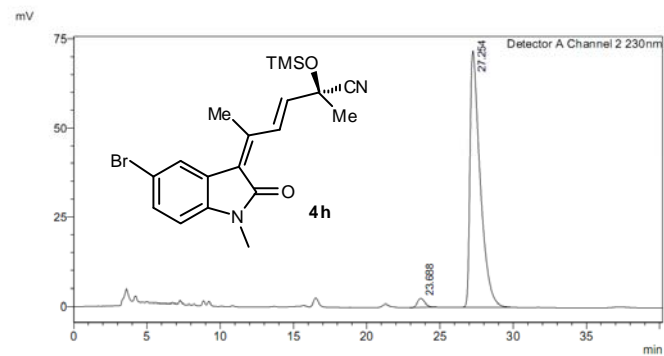

### <Peak Table>

| Detector A Channel 2 230nm |           |         |        |        |      |      |
|----------------------------|-----------|---------|--------|--------|------|------|
| Peak#                      | Ret. Time | Area    | Height | Conc.  | Unit | Name |
| 1                          | 23.688    | 88061   | 2448   | 2.482  |      |      |
| 2                          | 27.254    | 3459372 | 71643  | 97.518 | V    |      |
| Total                      |           | 3547433 | 74091  |        |      |      |

E:\data\zyl\ZYL-ZJ-75-ASY--IE-95-5-205-230-1-.lcd

## &lt;Sample Information&gt;

Sample Name : ZYL-ZJ-79-RAC-IE-90-10-205-230-1  
 Sample ID :  
 Data Filename : ZYL-ZJ-79-RAC-IE-90-10-205-230-1.lcd  
 Method Filename : ZYL-A.lcm  
 Batch Filename :  
 Vial # : 0-0  
 Injection Volume : 20 uL  
 Date Acquired : 2014-8-27 16:38:25  
 Date Processed : 2014-8-27 17:02:54

Sample Type : Unknown  
 Acquired by : System Administrator  
 Processed by : System Administrator

## &lt;Chromatogram&gt;

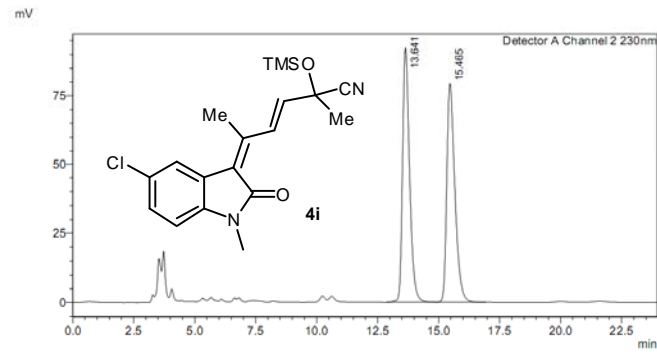

## &lt;Peak Table&gt;

| Detector A Channel 2 230nm |           |         |        |        |      |      |      |
|----------------------------|-----------|---------|--------|--------|------|------|------|
| Peak#                      | Ret. Time | Area    | Height | Conc.  | Unit | Mark | Name |
| 1                          | 13.641    | 1845979 | 92153  | 50.220 |      |      |      |
| 2                          | 15.465    | 1829776 | 79304  | 49.780 |      | SV   |      |
| Total                      |           | 3675755 | 171458 |        |      |      |      |

E:\data\zyl\ZYL-ZJ-79-RAC-IE-90-10-205-230-1.lcd

## &lt;Sample Information&gt;

Sample Name : ZYL-ZJ-79-ASY-IE-90-10-205-230-1  
 Sample ID :  
 Data Filename : ZYL-ZJ-79-ASY-IE-90-10-205-230-1.lcd  
 Method Filename : ZYL-A.lcm  
 Batch Filename :  
 Vial # : 0-0  
 Injection Volume : 20 uL  
 Date Acquired : 2014-8-27 16:19:04  
 Date Processed : 2014-8-27 17:03:47

Sample Type : Unknown  
 Acquired by : System Administrator  
 Processed by : System Administrator

## &lt;Chromatogram&gt;

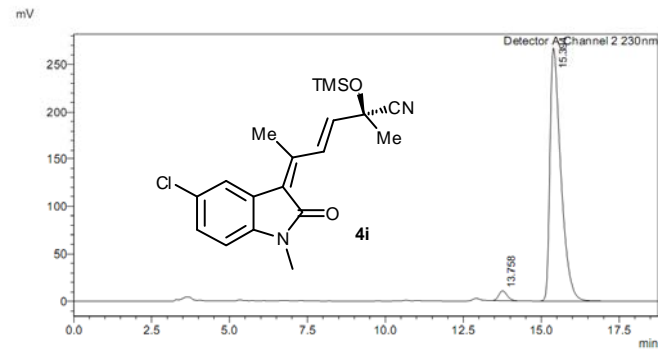

## &lt;Peak Table&gt;

| Detector A Channel 2 230nm |           |         |        |        |      |      |      |
|----------------------------|-----------|---------|--------|--------|------|------|------|
| Peak#                      | Ret. Time | Area    | Height | Conc.  | Unit | Mark | Name |
| 1                          | 13.758    | 196312  | 10636  | 2.922  |      | M    |      |
| 2                          | 15.394    | 6522235 | 266913 | 97.078 |      | S    |      |
| Total                      |           | 6718547 | 277549 |        |      |      |      |

E:\data\zyl\ZYL-ZJ-79-ASY-IE-90-10-205-230-1.lcd

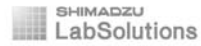

## Analysis Report

### <Sample Information>

Sample Name : ZYL-ZJ-95--RAC-IE-85-15-205-230-1-  
 Sample ID :  
 Data Filename : ZYL-ZJ-95--RAC-IE-85-15-205-230-1-4.lcd  
 Method Filename : ZYL-A.lcm  
 Batch Filename :  
 Vial # : 0-0 Sample Type : Unknown  
 Injection Volume : 20 uL  
 Date Acquired : 2014-9-1 22:12:39 Acquired by : System Administrator  
 Date Processed : 2014-9-1 22:47:37 Processed by : System Administrator

### <Chromatogram>

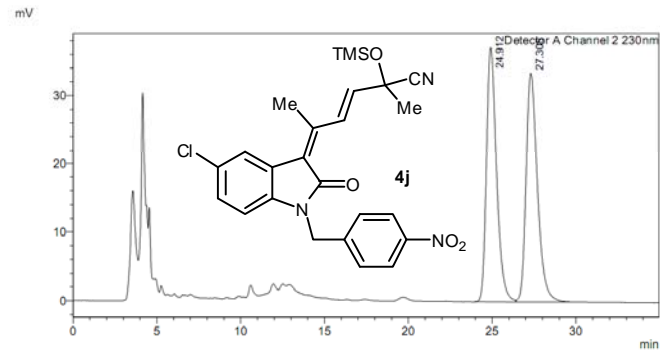

### <Peak Table>

| Detector A Channel 2 230nm |           |         |        |        |      |      |      |
|----------------------------|-----------|---------|--------|--------|------|------|------|
| Peak#                      | Ret. Time | Area    | Height | Conc.  | Unit | Mark | Name |
| 1                          | 24.912    | 1559108 | 37154  | 49.854 |      |      |      |
| 2                          | 27.305    | 1568224 | 33433  | 50.146 |      | SV   |      |
| Total                      |           | 3127332 | 70587  |        |      |      |      |

E:\data\zyl\ZYL-ZJ-95--RAC-IE-85-15-205-230-1-4.lcd

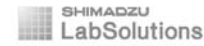

## Analysis Report

### <Sample Information>

Sample Name : ZYL-ZJ-95-ASY-IE-85-15-205-230-1-  
 Sample ID :  
 Data Filename : ZYL-ZJ-95-ASY-IE-85-15-205-230-1-3.lcd  
 Method Filename : ZYL-A.lcm  
 Batch Filename :  
 Vial # : 0-0 Sample Type : Unknown  
 Injection Volume : 20 uL  
 Date Acquired : 2014-9-1 21:36:26 Acquired by : System Administrator  
 Date Processed : 2014-9-1 22:11:15 Processed by : System Administrator

### <Chromatogram>

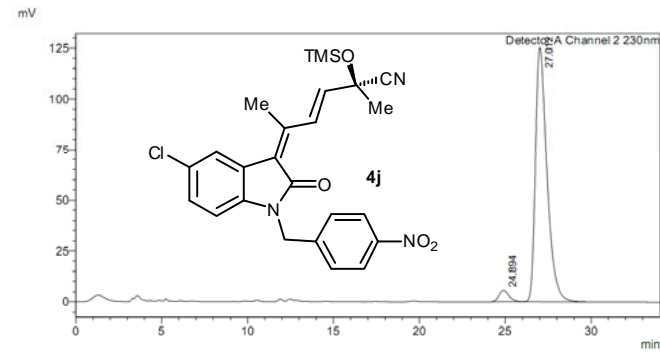

### <Peak Table>

| Detector A Channel 2 230nm |           |         |        |        |      |      |      |
|----------------------------|-----------|---------|--------|--------|------|------|------|
| Peak#                      | Ret. Time | Area    | Height | Conc.  | Unit | Mark | Name |
| 1                          | 24.894    | 230621  | 5769   | 3.784  |      | M    |      |
| 2                          | 27.012    | 5864489 | 125199 | 96.216 |      | S    |      |
| Total                      |           | 6095110 | 130968 |        |      |      |      |

E:\data\zyl\ZYL-ZJ-95-ASY-IE-85-15-205-230-1-3.lcd



SHIMADZU LabSolutions Analysis Report

## &lt;Sample Information&gt;

Sample Name : ZYL-ZJ-97-RAC-IE-90-10-205-230-1-  
 Sample ID :  
 Data Filename : ZYL-ZJ-97-RAC-IE-90-10-205-230-1-5.lcd  
 Method Filename : ZYL-A.lcm  
 Batch Filename :  
 Vial # : 0-0  
 Injection Volume : 20 uL  
 Date Acquired : 2014-9-2 9:08:13  
 Date Processed : 2014-9-2 9:30:26

Sample Type : Unknown  
 Acquired by : System Administrator  
 Processed by : System Administrator

## &lt;Chromatogram&gt;

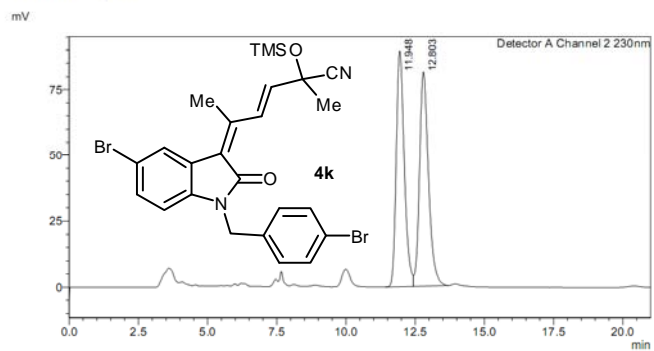

## &lt;Peak Table&gt;

| Detector A Channel 2 230nm |           |         |        |        |      |      |      |
|----------------------------|-----------|---------|--------|--------|------|------|------|
| Peak#                      | Ret. Time | Area    | Height | Conc.  | Unit | Mark | Name |
| 1                          | 11.948    | 1806720 | 89446  | 49.672 |      |      |      |
| 2                          | 12.803    | 1830604 | 81087  | 50.328 |      | V    |      |
| Total                      |           | 3637324 | 170534 |        |      |      |      |

E:\data\zyl\ZYL-ZJ-97-RAC-IE-90-10-205-230-1-5.lcd

SHIMADZU LabSolutions Analysis Report

## &lt;Sample Information&gt;

Sample Name : ZYL-ZJ-97-ASY-IE-90-10-205-230-1-  
 Sample ID :  
 Data Filename : ZYL-ZJ-97-ASY-IE-90-10-205-230-1-6.lcd  
 Method Filename : ZYL-A.lcm  
 Batch Filename :  
 Vial # : 0-0  
 Injection Volume : 20 uL  
 Date Acquired : 2014-9-2 9:31:52  
 Date Processed : 2014-9-2 9:49:19

Sample Type : Unknown  
 Acquired by : System Administrator  
 Processed by : System Administrator

## &lt;Chromatogram&gt;

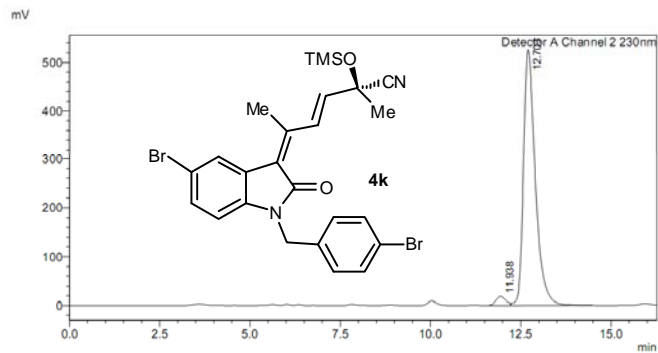

## &lt;Peak Table&gt;

| Detector A Channel 2 230nm |           |          |        |        |      |      |      |
|----------------------------|-----------|----------|--------|--------|------|------|------|
| Peak#                      | Ret. Time | Area     | Height | Conc.  | Unit | Mark | Name |
| 1                          | 11.938    | 352284   | 18543  | 2.860  |      | M    |      |
| 2                          | 12.703    | 11964055 | 525704 | 97.140 |      | V M  |      |
| Total                      |           | 12316339 | 544246 |        |      |      |      |

E:\data\zyl\ZYL-ZJ-97-ASY-IE-90-10-205-230-1-6.lcd

**319 czy-cr-124-1-rac-AD-97-3-1-230**

|                  |                                       |                   |                 |
|------------------|---------------------------------------|-------------------|-----------------|
| Sample Name:     | <b>czy-cr-124-1-rac-AD-97-3-1-230</b> | Injection Volume: | <b>20.0</b>     |
| Vial Number:     | <b>426</b>                            | Channel:          | <b>UV_VIS_1</b> |
| Sample Type:     | <b>standard</b>                       | Wavelength:       | <b>230</b>      |
| Control Program: | <b>czy</b>                            | Bandwidth:        | <b>n.a.</b>     |
| Quantif. Method: | <b>czy</b>                            | Dilution Factor:  | <b>1.0000</b>   |
| Recording Time:  | <b>2015-12-22 14:09</b>               | Sample Weight:    | <b>1.0000</b>   |
| Run Time (min):  | <b>8.69</b>                           | Sample Amount:    | <b>1.0000</b>   |

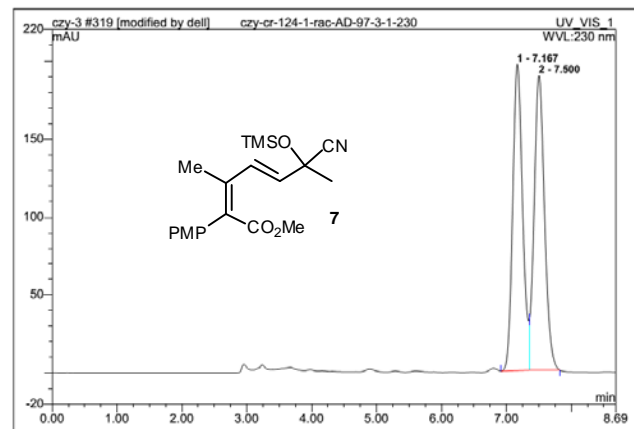

| No.           | Ret.Time<br>min | Peak Name | Height<br>mAU | Area<br>mAU*min | Rel.Area<br>% | Amount | Type |
|---------------|-----------------|-----------|---------------|-----------------|---------------|--------|------|
| 1             | 7.17            | n.a.      | 196.429       | 34.658          | 49.67         | n.a.   | BM * |
| 2             | 7.50            | n.a.      | 188.856       | 35.122          | 50.33         | n.a.   | MB*  |
| <b>Total:</b> |                 |           | 385.285       | 69.779          | 100.00        | 0.000  |      |

**321 czy-cr-126-as-AD-97-3-1-230-2**

|                  |                                      |                   |                 |
|------------------|--------------------------------------|-------------------|-----------------|
| Sample Name:     | <b>czy-cr-126-as-AD-97-3-1-230-2</b> | Injection Volume: | <b>20.0</b>     |
| Vial Number:     | <b>428</b>                           | Channel:          | <b>UV_VIS_1</b> |
| Sample Type:     | <b>standard</b>                      | Wavelength:       | <b>230</b>      |
| Control Program: | <b>czy</b>                           | Bandwidth:        | <b>n.a.</b>     |
| Quantif. Method: | <b>czy</b>                           | Dilution Factor:  | <b>1.0000</b>   |
| Recording Time:  | <b>2015-12-22 14:31</b>              | Sample Weight:    | <b>1.0000</b>   |
| Run Time (min):  | <b>7.98</b>                          | Sample Amount:    | <b>1.0000</b>   |

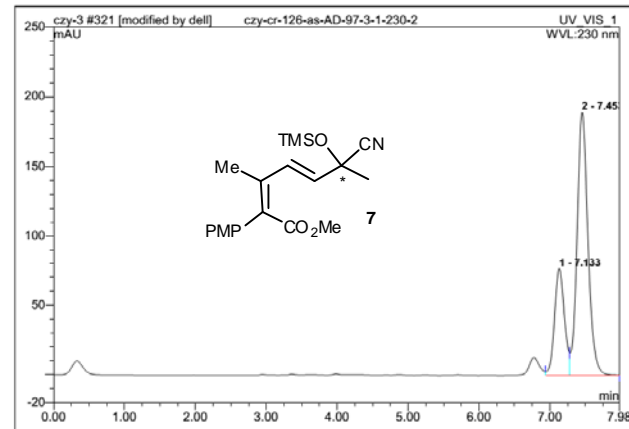

| No.           | Ret.Time<br>min | Peak Name | Height<br>mAU | Area<br>mAU*min | Rel.Area<br>% | Amount | Type |
|---------------|-----------------|-----------|---------------|-----------------|---------------|--------|------|
| 1             | 7.13            | n.a.      | 76.480        | 12.417          | 26.97         | n.a.   | M *  |
| 2             | 7.45            | n.a.      | 189.564       | 33.620          | 73.03         | n.a.   | MB*  |
| <b>Total:</b> |                 |           | 266.044       | 46.038          | 100.00        | 0.000  |      |

**329 czy-cr-145-RAC-OD-90-10-1-230-2**

|                  |                                        |                   |                 |
|------------------|----------------------------------------|-------------------|-----------------|
| Sample Name:     | <b>czy-cr-145-RAC-OD-90-10-1-230-2</b> | Injection Volume: | <b>20.0</b>     |
| Vial Number:     | <b>436</b>                             | Channel:          | <b>UV_VIS_1</b> |
| Sample Type:     | <b>standard</b>                        | Wavelength:       | <b>230</b>      |
| Control Program: | <b>czy</b>                             | Bandwidth:        | <b>n.a.</b>     |
| Quantif. Method: | <b>czy</b>                             | Dilution Factor:  | <b>1.0000</b>   |
| Recording Time:  | <b>2016-1-6 20:03</b>                  | Sample Weight:    | <b>1.0000</b>   |
| Run Time (min):  | <b>6.65</b>                            | Sample Amount:    | <b>1.0000</b>   |

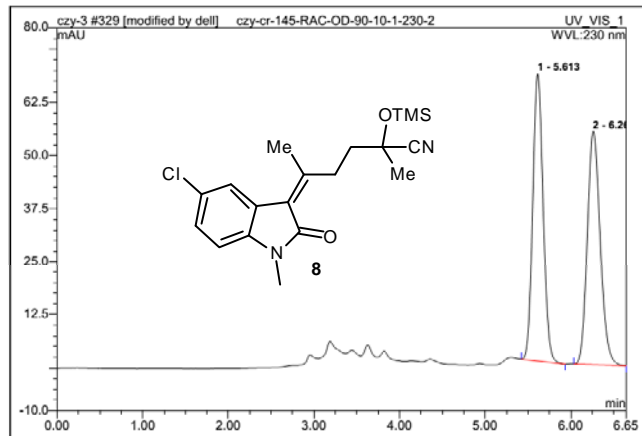

| No.           | Ret.Time<br>min | Peak Name | Height<br>mAU | Area<br>mAU*min | Rel.Area<br>% | Amount | Type |
|---------------|-----------------|-----------|---------------|-----------------|---------------|--------|------|
| 1             | 5.61            | n.a.      | 67.616        | 9.482           | 49.81         | n.a.   | BMB* |
| 2             | 6.26            | n.a.      | 54.853        | 9.556           | 50.19         | n.a.   | BMB* |
| <b>Total:</b> |                 |           | 122.469       | 19.038          | 100.00        | 0.000  |      |

**328 czy-cr-147-as-OD-90-10-1-230-2**

|                  |                                       |                   |                 |
|------------------|---------------------------------------|-------------------|-----------------|
| Sample Name:     | <b>czy-cr-147-as-OD-90-10-1-230-2</b> | Injection Volume: | <b>20.0</b>     |
| Vial Number:     | <b>435</b>                            | Channel:          | <b>UV_VIS_1</b> |
| Sample Type:     | <b>standard</b>                       | Wavelength:       | <b>230</b>      |
| Control Program: | <b>czy</b>                            | Bandwidth:        | <b>n.a.</b>     |
| Quantif. Method: | <b>czy</b>                            | Dilution Factor:  | <b>1.0000</b>   |
| Recording Time:  | <b>2016-1-6 19:52</b>                 | Sample Weight:    | <b>1.0000</b>   |
| Run Time (min):  | <b>6.63</b>                           | Sample Amount:    | <b>1.0000</b>   |

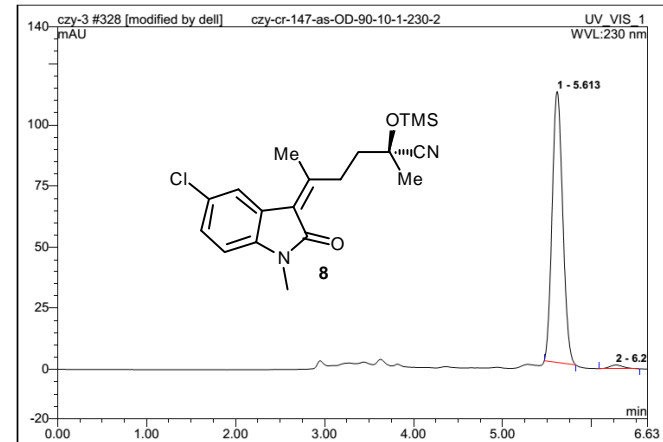

| No.           | Ret.Time<br>min | Peak Name | Height<br>mAU | Area<br>mAU*min | Rel.Area<br>% | Amount | Type |
|---------------|-----------------|-----------|---------------|-----------------|---------------|--------|------|
| 1             | 5.61            | n.a.      | 110.841       | 15.284          | 98.07         | n.a.   | BMB* |
| 2             | 6.27            | n.a.      | 1.578         | 0.300           | 1.93          | n.a.   | MB*  |
| <b>Total:</b> |                 |           | 112.419       | 15.584          | 100.00        | 0.000  |      |
